# Supplementary material for: The synthesis of α-aryl-α-aminophosphonates and α-aryl-α-aminophosphine oxides by the microwave-assisted Pudovik reaction
Source: publisher site journal article supplement (doi:10.3762/bjoc.13.10), 2017-01-12
Supplement: Additional file 1 [file 1860-5397-13-10-S1.pdf]

**Supporting Information**  
**for**  
**The synthesis of  $\alpha$ -aryl- $\alpha$ -aminophosphonates and  $\alpha$ -aryl- $\alpha$ -aminophosphine oxides by the microwave-assisted Pudovik reaction**

Erika Bálint<sup>1\*</sup>, Ádám Tajti<sup>2</sup>, Anna Ádám<sup>2</sup>, István Csontos<sup>2</sup>, Konstantin Karaghiosoff<sup>3</sup>, Mátyás Czugler<sup>2</sup>, Péter Ábrányi-Balogh<sup>4</sup> and György Keglevich<sup>2\*</sup>

Address: <sup>1</sup>MTA-BME Research Group for Organic Chemical Technology, 1521 Budapest, Hungary, <sup>2</sup>Department of Organic Chemistry and Technology, Budapest University of Technology and Economics, 1521 Budapest, Hungary, <sup>3</sup>Department Chemie, Ludwig-Maximilians-Universität München, 81377 München, Germany and <sup>4</sup>Hungarian Academy of Sciences, Research Centre for Natural Sciences, Institute of Organic Chemistry, 1519 Budapest, Hungary

Email: Erika Bálint\* - [ebalint@mail.bme.hu](mailto:ebalint@mail.bme.hu); György Keglevich\* - [gkeglevich@mail.bme.hu](mailto:gkeglevich@mail.bme.hu)

\*Corresponding author

**Experimental, X-ray crystallographic data, and NMR spectra**

**Table of contents**

|                                                                                                                 |     |
|-----------------------------------------------------------------------------------------------------------------|-----|
| General information .....                                                                                       | S2  |
| General procedure for the preparation of <i>N</i> -benzylideneamines .....                                      | S3  |
| General procedure for the synthesis of the $\alpha$ -aminophosphonates and $\alpha$ -aminophosphine oxides..... | S4  |
| Real time monitoring of the addition of diethyl phosphite to <i>N</i> -benzylidene(butyl)amine .....            | S12 |
| Single crystal X-ray diffraction measurements .....                                                             | S13 |
| Quantum chemical calculations .....                                                                             | S16 |
| <sup>31</sup> P NMR, <sup>1</sup> H NMR and <sup>13</sup> C NMR spectra .....                                   | S17 |
| References .....                                                                                                | S51 |

## General information

The reactions were carried out in a 300 W CEM Discover focused microwave reactor (CEM Microwave Technology Ltd., Buckingham, UK) equipped with a pressure controller using 20–30 W irradiation under isothermal conditions.

GC measurements were performed on an HP5890 series 2 GC-FID chromatograph, using a 15 m × 0.18 mm Restek, Rtx-5 column with a film layer of 0.20 μm. The temperature of the column was initially held at 40 °C for 1 min, followed by programming at 25 °C/min up to 300 °C, and a final period at 300 °C (isothermal) for 10 min. The temperature of the injector was 290 °C, and of the FID detector 300 °C. The carrier gas was N<sub>2</sub>.

GC–MS measurements were performed on an Agilent 6890 N-GC-5973 N-MSD chromatograph, using a 30 m × 0.25 mm Restek, Rtx-5SILMS column with a film layer of 0.25 μm. The initial temperature of column was 45 °C for 1 min, followed by programming at 10 °C/min up to 310 °C and a final period at 310 °C (isothermal) for 17 min. The temperature of the injector was 250 °C. The carrier gas was He and the operation mode was splitless.

LC–MS experiments were performed with an Agilent 1200 liquid chromatography system coupled with a 6130 quadrupole mass spectrometer equipped with an ESI ion source (Agilent Technologies, Palo Alto, CA, USA). Analysis was performed at 40 °C on a Gemini C18 column (150 mm × 4.6 mm, 3 μm; Phenomenex, Torrance, CA, USA) with a mobile phase flow rate of 0.6 mL/min. The composition of eluent A was 0.1% NH<sub>4</sub>HCO<sub>3</sub> in water; eluent B was 0.1% NH<sub>4</sub>HCO<sub>3</sub> and 8% water in acetonitrile; 0→3 min 5% B, 3→13 min gradient, 13→20 min 95% B. The injection volume was 20 μL. The chromatographic profile was registered at 222 nm. The MSD operating parameters were as follows: positive ionization mode, scan spectra from *m/z* 100 to 1000, drying gas temperature 300 °C, nitrogen-flow rate 12 L/min, nebulizer pressure 60 psi, capillary voltage 2500 V.

High resolution mass spectrometric measurements were performed using a Q-TOF Premier mass spectrometer in positive electrospray mode.

The <sup>31</sup>P, <sup>13</sup>C, <sup>1</sup>H NMR spectra were taken in CDCl<sub>3</sub> solution on a Bruker AV-300 or DRX-500 spectrometer operating at 121.5, 75.5 and 300 or 202.4, 125.7 and 500 MHz, respectively. Chemical shifts are downfield relative to 85% H<sub>3</sub>PO<sub>4</sub> and TMS. Non-equivalence effects were observed in <sup>1</sup>H and <sup>13</sup>C{<sup>1</sup>H} NMR spectra. Corresponding pairs of resonances were marked with (I) and (II), respectively.

In situ FTIR measurements were conducted using a ReactIR 1000 equipment (Mettler-Toledo Inc., Columbus, OH). An attenuated total reflectance (ATR) diamond probe was placed in a

100-mL four-necked flask equipped with a dropping funnel, a condenser, a thermometer, and a magnetic stirrer. The temperature was maintained by using an appropriately adjusted oil bath.

### General procedure for the preparation of *N*-benzylideneamines

A mixture of 25 mmol of amine [butylamine (2.5 mL), cyclohexylamine (2.9 mL), aniline (2.3 mL)] and 25 mmol of aldehyde [benzaldehyde (2.6 mL), 2-chlorobenzaldehyde (2.8 mL), 3-chlorobenzaldehyde (2.8 mL), 4-chlorobenzaldehyde (3.5 g)] was stirred for 6–10 min at rt (25 °C). After completion, 10 mL of dichloromethane were added to the mixture, dried ( $\text{Na}_2\text{SO}_4$ ) and filtered. Evaporation of the volatile components provided the products **1a–f**.

#### *N*-Benzylidene(butyl)amine (**1a**)

Yield: 97% (3.9 g) of compound **1a** as pale yellow oil;  $^{13}\text{C}$  NMR ( $\text{CDCl}_3$ )  $\delta$  13.9 ( $\text{CH}_3$ ), 20.5 ( $\text{CH}_3\text{CH}_2$ ), 33.0 ( $\text{CH}_2\text{CH}_2\text{N}$ ), 61.5 ( $\text{CH}_2\text{N}$ ), 128.0 ( $\text{C}_2$ ), 128.6 ( $\text{C}_3$ ), 130.4 ( $\text{C}_4$ ), 136.4 ( $\text{C}_1$ ), 160.7 ( $\text{CH}=\text{N}$ );  $\delta$  [S1] ( $\text{CDCl}_3$ ) 13.5, 20.1, 32.6, 61.1, 127.6, 128.1, 130.0, 136.0, 160.2;  $[\text{M}+\text{H}]^+_{\text{found}} = 162.1282$ ,  $\text{C}_{11}\text{H}_{16}\text{N}$  requires 162.1277.

#### *N*-Benzylidene(cyclohexyl)amine (**1b**)

Yield: 96% (4.5 g) of compound **1b** as yellow oil;  $^{13}\text{C}$  NMR ( $\text{CDCl}_3$ )  $\delta$  24.8 ( $\text{C}_3$ ), 25.7 ( $\text{C}_4$ ), 34.4 ( $\text{C}_2$ ), 70.0 ( $\text{C}_1$ ), 128.1 ( $\text{C}_3'$ ), 128.5 ( $\text{C}_2'$ ), 130.3 ( $\text{C}_4'$ ), 136.6 ( $\text{C}_1'$ ), 158.6 ( $\text{CH}=\text{N}$ );  $\delta$  [S1] ( $\text{CDCl}_3$ ) 24.8, 25.6, 34.4, 70.0, 128.0, 128.5, 130.3, 136.6, 158.5;  $[\text{M}+\text{H}]^+_{\text{found}} = 188.1441$ ,  $\text{C}_{13}\text{H}_{18}\text{N}$  requires 188.1434.

#### *N*-Benzylideneaniline (**1c**)

Yield: 96% (4.3 g) of compound **1c** as yellow crystal; Mp: 47–48 °C; Mp [S2]: 50–51 °C;  $^{13}\text{C}$  NMR ( $\text{CDCl}_3$ )  $\delta$  120.9 ( $\text{C}_2$ ), 125.9 ( $\text{C}_4$ ), 128.77 ( $\text{C}_3'$ ), 128.81 ( $\text{C}_3$ ), 129.1 ( $\text{C}_2'$ ), 131.4 ( $\text{C}_4'$ ), 136.2 ( $\text{C}_1'$ ), 152.1 ( $\text{C}_1$ ), 160.4 ( $\text{CH}=\text{N}$ );  $\delta$  [S1] ( $\text{CDCl}_3$ ) 120.9, 125.9, 128.79, 128.83, 129.2, 131.4, 136.3, 152.1, 160.4;  $[\text{M}+\text{H}]^+_{\text{found}} = 182.0972$ ,  $\text{C}_{13}\text{H}_{12}\text{N}$  requires 182.0964.

#### *N*-2-Chlorobenzylidene(butyl)amine (**1d**)

Yield: 95% (4.6 g) of compound **1d** as pale yellow oil;  $^{13}\text{C}$  NMR ( $\text{CDCl}_3$ )  $\delta$  13.9 ( $\text{CH}_3$ ), 20.5 ( $\text{CH}_3\text{CH}_2$ ), 32.9 ( $\text{CH}_2\text{CH}_2\text{N}$ ), 61.6 ( $\text{CH}_2\text{N}$ ), 127.0 ( $\text{C}_5$ ), 128.3 ( $\text{C}_6$ ), 129.7 ( $\text{C}_3$ ), 131.3 ( $\text{C}_4$ ), 133.4 ( $\text{C}_2$ ), 134.9 ( $\text{C}_1$ ), 157.5 ( $\text{CH}=\text{N}$ );  $\delta$  [S3] (DMSO) 13.85, 20.42, 32.92, 61.56, 126.92, 128.26, 129.68, 131.21, 133.40, 134.88, 157.44;  $[\text{M}+\text{H}]^+_{\text{found}} = 196.0895$ ,  $\text{C}_{11}\text{H}_{15}\text{NCl}$  requires 196.0888.

### ***N*-3-Chlorobenzylidene(butyl)amine (1e)**

Yield: 97% (4.7 g) of compound **1e** as yellow oil;  $^{13}\text{C}$  NMR ( $\text{CDCl}_3$ )  $\delta$  13.9 ( $\text{CH}_3$ ), 20.5 ( $\text{CH}_3\text{CH}_2$ ), 32.9 ( $\text{CH}_2\text{CH}_2\text{N}$ ), 61.4 ( $\text{CH}_2\text{N}$ ), 126.3 ( $\text{C}_6$ ), 127.7 ( $\text{C}_2$ ), 129.8 ( $\text{C}_5$ ), 130.4 ( $\text{C}_4$ ), 134.8 ( $\text{C}_1$ ), 138.2 ( $\text{C}_3$ ), 159.2 ( $\text{CH}=\text{N}$ );  $^1\text{H}$  NMR ( $\text{CDCl}_3$ )  $\delta$  0.95 (t,  $J_{\text{HH}} = 7.3$ , 3H,  $\text{CH}_3$ ), 1.31-1.46 (m, 2H,  $\text{CH}_3\text{CH}_2$ ), 1.61-1.75 (m, 2H,  $\text{CH}_2\text{CH}_2\text{N}$ ), 3.62 (t,  $J_{\text{HH}} = 7.0$ , 2H,  $\text{CH}_2\text{N}$ ), 7.29-7.41 (m, 2H,  $\text{C}_4\text{H}$ ,  $\text{C}_5\text{H}$ ), 7.53-7.59 (m, 1H,  $\text{C}_6\text{H}$ ), 7.75 (s, 1H,  $\text{C}_2\text{H}$ ), 8.22 (s, 1H,  $\text{CH}=\text{N}$ );  $[\text{M}+\text{H}]^+_{\text{found}} = 196.0892$ ,  $\text{C}_{11}\text{H}_{15}\text{NCl}$  requires 196.0888.

### ***N*-4-chlorobenzylidene(butyl)amine (1f)**

Yield: 96% (4.7 g) of compound **1f** as yellow oil;  $^{13}\text{C}$  NMR ( $\text{CDCl}_3$ )  $\delta$  13.9 ( $\text{CH}_3$ ), 20.5 ( $\text{CH}_3\text{CH}_2$ ), 33.0 ( $\text{CH}_2\text{CH}_2\text{N}$ ), 61.4 ( $\text{CH}_2\text{N}$ ), 128.8 ( $\text{C}_3$ ), 129.2 ( $\text{C}_2$ ), 134.9 ( $\text{C}_1$ ), 136.3 ( $\text{C}_4$ ), 159.3 ( $\text{CH}=\text{N}$ );  $\delta$  [S4] ( $\text{CDCl}_3$ ) 13.9, 20.4, 32.9, 61.4, 128.8, 129.2, 134.9, 136.3, 159.3;  $[\text{M}+\text{H}]^+_{\text{found}} = 196.0887$ ,  $\text{C}_{11}\text{H}_{15}\text{NCl}$  requires 196.0888.

### **General procedure for the synthesis of the $\alpha$ -aminophosphonates and $\alpha$ -aminophosphine oxides**

A mixture of 1 mmol imine derivate [**1a** (0.16 g), **1b** (0.19 g), **1c** (0.18 g), **1d-e** (0.20 g)] and  $>\text{P}(\text{O})\text{H}$  derivative (1.0 mmol [dimethyl phosphite (0.092 mL), diethyl phosphite (0.13 mL)] or 1.2 mmol [dimethyl phosphite (0.11 mL), diethyl phosphite (0.15 mL), dibutyl phosphite (0.23 mL), dibenzyl phosphite (0.27 mL), diphenylphosphine oxide (0.24 g)] or 1.5 mmol [dimethyl phosphite (0.14 mL)]) was irradiated in a sealed tube at 80–100 °C for 10–60 min in a CEM Microwave reactor equipped with a pressure controller. The volatile components were removed under reduced pressure. The residue obtained was purified by flash column chromatography using silica gel and dichloromethane/methanol 97:3 or ethyl acetate/hexane 1:1 as the eluent to afford  $\alpha$ -aminophosphonates and  $\alpha$ -aminophosphine oxides.

### **Dimethyl ((butylamino)(phenyl)methyl)phosphonate (2a)**

Yield: 73% (0.20 g) of compound **2a** as colorless oil;  $^{31}\text{P}$  NMR ( $\text{CDCl}_3$ )  $\delta$  26.0;  $^{13}\text{C}$  NMR ( $\text{CDCl}_3$ ) 13.9 ( $\text{CH}_3\text{CH}_2$ ), 20.3 ( $\text{CH}_3\text{CH}_2$ ), 32.0 (d,  $J_{\text{CP}} = 0.5$ ,  $\text{CH}_2\text{CH}_2\text{N}$ ), 47.7 (d,  $^3J_{\text{CP}} = 16.7$ ,  $\text{CH}_2\text{N}$ ), 53.5 (d,  $^2J_{\text{CP}} = 7.0$ ,  $\text{CH}_3\text{O}^{\text{I}}$ ), 53.7 (d,  $^2J_{\text{CP}} = 7.1$ ,  $\text{CH}_3\text{O}^{\text{II}}$ ), 60.8 (d,  $^1J_{\text{CP}} = 153.4$ ,  $\text{CHP}$ ), 127.9 (d,  $J_{\text{CP}} = 3.2$ ,  $\text{C}_4$ ), 128.4 (d,  $^3J_{\text{CP}} = 6.2$ ,  $\text{C}_2$ ), 128.5 (d,  $J_{\text{CP}} = 2.5$ ,  $\text{C}_3$ ), 136.0 (d,  $^2J_{\text{CP}} = 3.8$ ,  $\text{C}_1$ );  $^1\text{H}$  NMR ( $\text{CDCl}_3$ )  $\delta$  0.86 (t,  $J_{\text{HH}} = 7.2$ , 3H,  $\text{CH}_3\text{CH}_2$ ), 1.21-1.38 (m, 2H,  $\text{CH}_3\text{CH}_2$ ), 1.38-1.50 (m, 2H,  $\text{CH}_2\text{CH}_2\text{N}$ ), 1.94 (s, 1H,  $\text{NH}$ ), 2.36-2.59 (m, 2H,  $\text{CH}_2\text{N}$ ), 3.55 (d,  $J_{\text{HP}} = 10.4$ , 3H,

CH<sub>3</sub>O<sup>I</sup>), 3.74 (d,  $J_{HP}$  = 10.5, 3H, CH<sub>3</sub>O<sup>II</sup>), 4.05 (d,  $J_{HP}$  = 20.1, 1H, CHP), 7.26-7.45 (m, 5H, ArH); [M+H]<sup>+</sup><sub>found</sub> = 272.1408, C<sub>13</sub>H<sub>23</sub>NO<sub>3</sub>P requires 272.1410.

#### Diethyl ((butylamino)(phenyl)methyl)phosphonate (2b)

Yield: 85% (0.25 g) of compound **2b** as colorless oil; <sup>31</sup>P NMR (CDCl<sub>3</sub>) δ 23.8; δ [S5] (CDCl<sub>3</sub>) 23.6; [M+H]<sup>+</sup><sub>found</sub> = 300.1734, C<sub>15</sub>H<sub>27</sub>NO<sub>3</sub>P requires 300.1723.

#### Dibutyl ((butylamino)(phenyl)methyl)phosphonate (2c)

Yield: 90% (0.32 g) of compound **2c** as colorless oil; <sup>31</sup>P NMR (CDCl<sub>3</sub>) δ 24.2; <sup>13</sup>C NMR (CDCl<sub>3</sub>) 13.6 (CH<sub>3</sub>(CH<sub>2</sub>)<sub>3</sub>O<sup>I</sup>), 13.7 (CH<sub>3</sub>(CH<sub>2</sub>)<sub>3</sub>O<sup>II</sup>), 14.0 (CH<sub>3</sub>(CH<sub>2</sub>)<sub>3</sub>N), 18.6 (CH<sub>2</sub>(CH<sub>2</sub>)<sub>2</sub>O<sup>I</sup>), 18.7 (CH<sub>2</sub>(CH<sub>2</sub>)<sub>2</sub>O<sup>II</sup>), 20.3 (CH<sub>2</sub>(CH<sub>2</sub>)<sub>2</sub>N), 32.0 (d,  $J_{CP}$  = 0.5, CH<sub>2</sub>CH<sub>2</sub>N), 32.5 (d,  $^3J_{CP}$  = 5.8, CH<sub>2</sub>CH<sub>2</sub>O<sup>I</sup>), 32.6 (d,  $^3J_{CP}$  = 5.8, CH<sub>2</sub>CH<sub>2</sub>O<sup>II</sup>), 47.8 (d,  $^3J_{CP}$  = 16.5, CH<sub>2</sub>N), 61.2 (d,  $^1J_{CP}$  = 152.7, CHP), 66.4 (d,  $^2J_{CP}$  = 7.2, CH<sub>2</sub>O<sup>I</sup>), 66.6 (d,  $^2J_{CP}$  = 7.3, CH<sub>2</sub>O<sup>II</sup>), 127.7 (d,  $J_{CP}$  = 3.2, C<sub>4</sub>), 128.3 (d,  $J_{CP}$  = 2.5, C<sub>3</sub>), 128.5 (d,  $^3J_{CP}$  = 6.2, C<sub>2</sub>), 136.5 (d,  $^2J_{CP}$  = 4.1, C<sub>1</sub>); <sup>1</sup>H NMR (CDCl<sub>3</sub>) δ 0.84 (t,  $J_{HH}$  = 7.2, 3H, CH<sub>3</sub>(CH<sub>2</sub>)<sub>3</sub>O<sup>I</sup>), 0.86 (t,  $J_{HH}$  = 6.8, 3H, CH<sub>3</sub>(CH<sub>2</sub>)<sub>3</sub>N), 0.90 (t,  $J_{HH}$  = 7.2, 3H, CH<sub>3</sub>(CH<sub>2</sub>)<sub>3</sub>O<sup>II</sup>), 1.16-1.53 (m, 10H, CH<sub>2</sub>CH<sub>2</sub>CH<sub>2</sub>N, CH<sub>2</sub>CH<sub>2</sub>CH<sub>2</sub>O, CH<sub>2</sub>CH<sub>2</sub>O<sup>I</sup>), 1.54-1.67 (m, 2H, CH<sub>2</sub>CH<sub>2</sub>O<sup>II</sup>), 1.98 (s, 1H, NH), 2.37-2.60 (m, 2H, CH<sub>2</sub>N) 3.69-3.82 (m, 1H, CH<sub>A</sub>, CH<sub>2</sub>O<sup>I</sup>), 3.84-3.95 (m, 1H, CH<sub>B</sub>, CH<sub>2</sub>O<sup>I</sup>), 3.95-4.09 [4.02 (d,  $J_{HP}$  = 19.6, CHP) overlapped by the multiplet of CH<sub>2</sub>O<sup>II</sup> total int. 3H], 7.23-7.37 (m, 3H, C<sub>2</sub>H, C<sub>4</sub>H), 7.37-7.46 (m, 2H, C<sub>3</sub>H); [M+H]<sup>+</sup><sub>found</sub> = 356.2360, C<sub>19</sub>H<sub>35</sub>NO<sub>3</sub>P requires 356.2349.

#### Dibenzyl ((butylamino)(phenyl)methyl)phosphonate (2d)

Yield: 69% (0.29 g) of compound **2d** as colorless oil; <sup>31</sup>P NMR (CDCl<sub>3</sub>) δ 25.3; <sup>13</sup>C NMR (CDCl<sub>3</sub>) 13.9 (CH<sub>3</sub>), 20.2 (CH<sub>3</sub>CH<sub>2</sub>), 32.0 (d,  $J_{CP}$  = 0.4, CH<sub>2</sub>CH<sub>2</sub>N), 47.8 (d,  $^3J_{CP}$  = 16.7, CH<sub>2</sub>N), 61.4 (d,  $^1J_{CP}$  = 152.6, CHP), 68.1 (d,  $^2J_{CP}$  = 6.8, CH<sub>2</sub>O<sup>I</sup>), 68.3 (d,  $^2J_{CP}$  = 7.1, CH<sub>2</sub>O<sup>II</sup>), 127.7 (C<sub>2</sub><sup>I</sup>), 127.85 (d,  $J_{CP}$  = 3.1, C<sub>4</sub>), 127.88 (C<sub>2</sub><sup>II</sup>), 128.15 (C<sub>4</sub><sup>I</sup>), 128.22 (C<sub>4</sub><sup>II</sup>), 128.37 (C<sub>3</sub><sup>I</sup>), 128.440 (d,  $J_{CP}$  = 2.5, C<sub>3</sub>), 128.444 (C<sub>3</sub><sup>II</sup>), 125.5 (d,  $^3J_{CP}$  = 6.3, C<sub>2</sub>), 136.0 (d,  $^2J_{CP}$  = 3.7, C<sub>1</sub>), 136.3 (d,  $^3J_{CP}$  = 6.2, C<sub>1</sub><sup>I</sup>), 136.5 (d,  $^3J_{CP}$  = 6.2, C<sub>1</sub><sup>II</sup>); <sup>1</sup>H NMR (CDCl<sub>3</sub>) δ 0.84 (t,  $J_{HH}$  = 7.2, 3H, CH<sub>3</sub>), 1.17-1.33 (m, 2H, CH<sub>3</sub>CH<sub>2</sub>), 1.33-1.45 (m, 2H, CH<sub>2</sub>CH<sub>2</sub>N), 1.84 (s, 1H, NH), 2.34-2.58 (m, 2H, CH<sub>2</sub>N), 4.06 (d,  $J_{HP}$  = 20.0, 1H, CHP), 4.73 (dd,  $J_{HP}$  = 11.9,  $J_{HH}$  = 8.1, 1H, CH<sub>A</sub>, CH<sub>2</sub>O<sup>I</sup>), 4.88 (dd,  $J_{HP}$  = 11.9,  $J_{HH}$  = 7.2, 1H, CH<sub>B</sub>, CH<sub>2</sub>O<sup>I</sup>), 5.02 (qd,  $J_{HP}$  = 11.9,  $J_{HH}$  = 8.0, 2H, CH<sub>2</sub>O<sup>II</sup>), 7.08-7.19 (m, 2H, C<sub>4</sub>H), 7.21-7.46 (m, 13H, C<sub>2-4</sub>H, C<sub>2</sub>H and C<sub>3</sub>H), [M+H]<sup>+</sup><sub>found</sub> = 424.2037, C<sub>25</sub>H<sub>31</sub>NO<sub>3</sub>P requires 424.2036.

**((Butylamino)(phenyl)methyl)diphenylphosphine oxide (2e)**

Yield: 89% (0.32 g) of compound **2e** as white crystal; Mp: 166-167 °C;  $^{31}\text{P}$  NMR ( $\text{CDCl}_3$ )  $\delta$  31.1;  $^{13}\text{C}$  NMR ( $\text{CDCl}_3$ )  $\delta$  13.9 ( $\text{CH}_3$ ), 20.2 ( $\text{CH}_3\text{CH}_2$ ), 31.9 ( $\text{CH}_2\text{CH}_2\text{N}$ ), 47.7 (d,  $^3J_{\text{CP}} = 13.8$ ,  $\text{CH}_2\text{N}$ ), 63.5 (d,  $^1J_{\text{CP}} = 79.4$ , CHP), 127.6 (d,  $J_{\text{CP}} = 2.7$ ,  $\text{C}_4$ ), 128.0 (d,  $^2J_{\text{CP}} = 11.5$ ,  $\text{C}_2^{\text{I}}$ ), 128.1 (d,  $J_{\text{CP}} = 2.1$ ,  $\text{C}_3$ ), 128.3 (d,  $^2J_{\text{CP}} = 11.4$ ,  $\text{C}_2^{\text{II}}$ ), 128.8 (d,  $^3J_{\text{CP}} = 5.2$ ,  $\text{C}_2$ ), 131.2 (d,  $^1J_{\text{CP}} = 95.6$ ,  $\text{C}_1^{\text{I}}$ ), 131.3 (d,  $^1J_{\text{CP}} = 97.0$ ,  $\text{C}_1^{\text{II}}$ ), 131.5 (d,  $J_{\text{CP}} = 2.8$ ,  $\text{C}_4^{\text{I}}$ ), 131.7 (d,  $^3J_{\text{CP}} = 8.7$ ,  $\text{C}_3^{\text{I}}$ ), 131.8 (d,  $J_{\text{CP}} = 3.0$ ,  $\text{C}_4^{\text{II}}$ ), 132.1 (d,  $^3J_{\text{CP}} = 8.6$ ,  $\text{C}_3^{\text{II}}$ ), 135.6 (d,  $^2J_{\text{CP}} = 1.8$ ,  $\text{C}_1$ );  $^1\text{H}$  NMR ( $\text{CDCl}_3$ )  $\delta$  0.82 (t,  $J_{\text{HH}} = 7.2$ , 3H,  $\text{CH}_3$ ), 1.16-1.31 (m, 2H,  $\text{CH}_3\text{CH}_2$ ), 1.32-1.46 (m, 2H,  $\text{CH}_2\text{CH}_2\text{N}$ ), 1.76 (s, 1H, NH), 2.34-2.48 (m, 1H,  $\text{CH}_A$ ,  $\text{CH}_2\text{N}$ ), 2.50-2.64 (m, 1H,  $\text{CH}_B$ ,  $\text{CH}_2\text{N}$ ), 4.45 (d,  $J_{\text{HP}} = 11.3$ , 1H, CHP), 7.09-7.22 (m, 5H,  $\text{C}_{2-4}\text{H}$ ), 7.27-7.62 (m, 8H,  $\text{C}_2\text{-H}$ ,  $\text{C}_4\text{-H}$ ,  $\text{C}_3\text{-H}^{\text{I}}$ ), 7.80-7.92 (m, 2H,  $\text{C}_3\text{-H}^{\text{II}}$ );  $[\text{M}+\text{H}]^+_{\text{found}} = 364.1830$ ,  $\text{C}_{23}\text{H}_{27}\text{NOP}$  requires 364.1825.

**Dimethyl ((cyclohexylamino)(phenyl)methyl)phosphonate (4a)**

Yield: 87% (0.26 g) of compound **4a** as colorless oil;  $^{31}\text{P}$  NMR ( $\text{CDCl}_3$ )  $\delta$  26.5;  $\delta$  [S6] ( $\text{CDCl}_3$ ) 26.5;  $[\text{M}+\text{H}]^+_{\text{found}} = 298.1559$ ,  $\text{C}_{15}\text{H}_{25}\text{NO}_3\text{P}$  requires 298.1567.

**Diethyl ((cyclohexylamino)(phenyl)methyl)phosphonate (4b)**

Yield: 91% (0.30 g) of compound **4b** as colorless;  $^{31}\text{P}$  NMR ( $\text{CDCl}_3$ )  $\delta$  24.1;  $\delta$  [S5] ( $\text{CDCl}_3$ ) 24.3;  $[\text{M}+\text{H}]^+_{\text{found}} = 326.1890$ ,  $\text{C}_{17}\text{H}_{29}\text{NO}_3\text{P}$  requires 326.1880.

**Dibutyl ((cyclohexylamino)(phenyl)methyl)phosphonate (4c)**

Yield: 93% (0.35 g) of compound **4c** as colorless oil;  $^{31}\text{P}$  NMR ( $\text{CDCl}_3$ )  $\delta$  24.2;  $^{13}\text{C}$  NMR ( $\text{CDCl}_3$ ) 13.6 ( $\text{CH}_3^{\text{I}}$ ), 13.7 ( $\text{CH}_3^{\text{II}}$ ), 18.6 ( $\text{CH}_3\text{CH}_2^{\text{I}}$ ), 18.7 ( $\text{CH}_3\text{CH}_2^{\text{II}}$ ), 24.4 ( $\text{C}_3^{\text{I}}$ ), 24.9 ( $\text{C}_3^{\text{II}}$ ), 26.1 ( $\text{C}_4$ ), 32.0 ( $\text{C}_2^{\text{I}}$ ), 32.4 (d,  $^3J_{\text{CP}} = 5.9$ ,  $\text{CH}_2\text{CH}_2\text{O}^{\text{I}}$ ), 32.6 (d,  $^3J_{\text{CP}} = 5.9$ ,  $\text{CH}_2\text{CH}_2\text{O}^{\text{II}}$ ), 34.4 ( $\text{C}_2^{\text{II}}$ ), 53.5 (d,  $^3J_{\text{CP}} = 15.5$ ,  $\text{C}_1$ ), 57.6 (d,  $^1J_{\text{CP}} = 153.5$ , CHP), 66.3 (d,  $^2J_{\text{CP}} = 7.3$ ,  $\text{CH}_2\text{O}^{\text{I}}$ ), 66.8 (d,  $^2J_{\text{CP}} = 7.2$ ,  $\text{CH}_2\text{O}^{\text{II}}$ ), 127.6 (d,  $J_{\text{CP}} = 3.2$ ,  $\text{C}_4^{\text{I}}$ ), 128.3 (d,  $J_{\text{CP}} = 2.5$ ,  $\text{C}_3^{\text{I}}$ ), 128.5 (d,  $^3J_{\text{CP}} = 6.2$ ,  $\text{C}_2^{\text{I}}$ ), 137.0 (d,  $^2J_{\text{CP}} = 2.8$ ,  $\text{C}_1^{\text{I}}$ );  $^1\text{H}$  NMR ( $\text{CDCl}_3$ )  $\delta$  0.82 (t,  $J_{\text{HH}} = 7.3$ , 3H,  $\text{CH}_3^{\text{I}}$ ), 0.91 (t,  $J_{\text{HH}} = 7.3$ , 3H,  $\text{CH}_3^{\text{II}}$ ), 0.99-1.29 (m, 7H,  $\text{C}_{2-4}\text{H}_{\text{eq}}$ ,  $\text{CH}_3\text{CH}_2^{\text{I}}$ ), 1.30-1.47 (m, 4H,  $\text{CH}_3\text{CH}_2^{\text{II}}$ ,  $\text{CH}_2\text{CH}_2\text{O}^{\text{I}}$ ), 1.48-1.73 (m, 6H,  $\text{C}_2\text{H}_{\text{ax}}$ ,  $\text{C}_3\text{H}_{\text{ax}}$ ,  $\text{CH}_2\text{CH}_2\text{O}^{\text{II}}$ ), 1.88 (bs, 2H, NH,  $\text{C}_4\text{H}_{\text{ax}}$ ), 2.28-2.43 (m, 1H,  $\text{C}_1\text{H}$ ), 3.63-3.76 (m, 1H,  $\text{CH}_A$ ,  $\text{CH}_2\text{O}^{\text{I}}$ ), 3.80-3.93 (m, 1H,  $\text{CH}_B$ ,  $\text{CH}_2\text{O}^{\text{I}}$ ), 3.96-4.14 (m, 2H,  $\text{CH}_2\text{O}^{\text{II}}$ ), 4.19 (d,  $J_{\text{HP}} = 22.0$ , CHP), 7.23-7.36 (m, 3H,  $\text{C}_2\text{-H}$ ,  $\text{C}_4\text{-H}$ ), 7.37-7.43 (m, 2H,  $\text{C}_3\text{-H}$ );  $[\text{M}+\text{H}]^+_{\text{found}} = 382.2501$ ,  $\text{C}_{21}\text{H}_{37}\text{NO}_3\text{P}$  requires 382.2506.

**Dibenzyl ((cyclohexylamino)(phenyl)methyl)phosphonate (4d)**

Yield: 68% (0.31 g) of compound **4d** as colorless oil;  $^{31}\text{P}$  NMR ( $\text{CDCl}_3$ )  $\delta$  25.0;  $^{13}\text{C}$  NMR ( $\text{CDCl}_3$ ) 24.4 ( $\text{C}_3^{\text{I}}$ ), 24.8 ( $\text{C}_3^{\text{II}}$ ), 26.0 ( $\text{C}_4$ ), 32.0 ( $\text{C}_2^{\text{I}}$ ), 34.3 ( $\text{C}_2^{\text{II}}$ ), 53.6 (d,  $^3J_{\text{CP}} = 15.0$ ,  $\text{C}_1$ ), 57.9 (d,  $^1J_{\text{CP}} = 153.3$ , CHP), 67.9 (d,  $^2J_{\text{CP}} = 7.0$ ,  $\text{CH}_2\text{O}^{\text{I}}$ ), 68.6 (d,  $^2J_{\text{CP}} = 7.0$ ,  $\text{CH}_2\text{O}^{\text{II}}$ ), 127.7 ( $\text{C}_2^{\text{II}}$ ), 127.8 (d,  $J_{\text{CP}} = 3.2$ ,  $\text{C}_4^{\text{I}}$ ), 127.9 ( $\text{C}_2^{\text{II}}$ ), 128.1 ( $\text{C}_4^{\text{I}}$ ), 128.2 ( $\text{C}_4^{\text{II}}$ ), 128.4 ( $\text{C}_3^{\text{I}}$ ), 128.44 ( $\text{C}_3^{\text{II}}$ ), 128.45 (d,  $J_{\text{CP}} = 2.4$ ,  $\text{C}_3^{\text{I}}$ ), 128.50 (d,  $^3J_{\text{CP}} = 6.3$ ,  $\text{C}_2^{\text{I}}$ ), 136.4 (d,  $^3J_{\text{CP}} = 6.2$ ,  $\text{C}_1^{\text{I}}$ ), 136.6 (d,  $^2J_{\text{CP}} = 2.5$ ,  $\text{C}_1^{\text{I}}$ ), 136.7 (d,  $^3J_{\text{CP}} = 6.1$ ,  $\text{C}_1^{\text{II}}$ );  $^1\text{H}$  NMR ( $\text{CDCl}_3$ )  $\delta$  0.89-1.24 (m, 5H,  $\text{C}_{2-4}\text{H}_{\text{ax}}$ ), 1.44-1.73 (m, 4H,  $\text{C}_2\text{H}_{\text{ax}}$ ,  $\text{C}_3\text{H}_{\text{ax}}$ ), 1.76-1.90 (m, 2H, NH,  $\text{C}_4\text{H}_{\text{ax}}$ ), 2.35 (bs, 1H,  $\text{C}_1\text{H}$ ) 4.26 (d,  $J_{\text{HP}} = 22.1$ , 1H, CHP), 4.68 (dd,  $J_{\text{HP}} = 11.7$ ,  $J_{\text{HH}} = 8.1$ , 1H,  $\text{CH}_A$ ,  $\text{CH}_2\text{O}^{\text{I}}$ ), 4.86 (dd,  $J_{\text{HP}} = 11.8$ ,  $J_{\text{HH}} = 7.1$ , 1H,  $\text{CH}_B$ ,  $\text{CH}_2\text{O}^{\text{I}}$ ), 5.07 (qd,  $J_{\text{HP}} = 11.9$ ,  $J_{\text{HH}} = 7.7$ , 2H,  $\text{CH}_2\text{O}^{\text{II}}$ ), 7.12 (bs, 2H,  $\text{C}_4^{\text{II}}$ H), 7.21-7.44 (m, 13H,  $\text{C}_{2'-4'}\text{H}$ ,  $\text{C}_2^{\text{II}}$ H,  $\text{C}_3^{\text{II}}$ H),  $[\text{M}+\text{H}]^+_{\text{found}} = 450.2207$ ,  $\text{C}_{27}\text{H}_{33}\text{NO}_3\text{P}$  requires 450.2193.

**((Cyclohexylamino)(phenyl)methyl)diphenylphosphine oxide (4e)**

Yield: 88% (0.34 g) of compound **4e** as white crystal; Mp: 189-190 °C;  $^{31}\text{P}$  NMR ( $\text{CDCl}_3$ )  $\delta$  31.5;  $^{13}\text{C}$  NMR ( $\text{CDCl}_3$ )  $\delta$  24.2 ( $\text{C}_3^{\text{I}}$ ), 24.7 ( $\text{C}_3^{\text{II}}$ ), 26.0 ( $\text{C}_4$ ), 31.7 ( $\text{C}_2^{\text{I}}$ ), 34.4 ( $\text{C}_2^{\text{II}}$ ), 53.6 (d,  $^3J_{\text{CP}} = 12.8$ ,  $\text{C}_1$ ), 59.9 (d,  $^1J_{\text{CP}} = 79.8$ , CHP), 127.4 (d,  $J_{\text{CP}} = 2.7$ ,  $\text{C}_4^{\text{I}}$ ), 127.9 (d,  $^2J_{\text{CP}} = 11.5$ ,  $\text{C}_2^{\text{I}}$ ), 128.1 (d,  $J_{\text{CP}} = 2.1$ ,  $\text{C}_3^{\text{I}}$ ), 128.3 (d,  $^2J_{\text{CP}} = 11.4$ ,  $\text{C}_2^{\text{II}}$ ), 128.8 (d,  $^3J_{\text{CP}} = 5.1$ ,  $\text{C}_2^{\text{I}}$ ), 131.41 (d,  $J_{\text{CP}} = 2.7$ ,  $\text{C}_4^{\text{I}}$ ), 131.42 (d,  $^1J_{\text{CP}} = 96.4$ ,  $\text{C}_1^{\text{I}}$ ), 131.63 (d,  $^3J_{\text{CP}} = 8.7$ ,  $\text{C}_3^{\text{I}}$ ), 131.64 (d,  $^1J_{\text{CP}} = 97.2$ ,  $\text{C}_1^{\text{II}}$ ), 131.7 (d,  $J_{\text{CP}} = 2.8$ ,  $\text{C}_4^{\text{II}}$ ), 132.1 (d,  $^3J_{\text{CP}} = 8.6$ ,  $\text{C}_3^{\text{II}}$ ), 136.0 (d,  $^2J_{\text{CP}} = 1.6$ ,  $\text{C}_1^{\text{I}}$ );  $^1\text{H}$  NMR ( $\text{CDCl}_3$ )  $\delta$  0.97-1.21 (m, 5H,  $\text{C}_{2-4}\text{H}_{\text{eq}}$ ), 1.48-1.60 (m, 4H,  $\text{C}_2\text{H}_{\text{ax}}$  and  $\text{C}_3\text{H}_{\text{ax}}$ ), 1.87 (bs, 1H,  $\text{C}_4\text{H}_{\text{ax}}$ ), 2.04 (s, 1H, NH), 2.34 (bs, 1H,  $\text{C}_1\text{H}$ ), 4.63 (d,  $J_{\text{HP}} = 11.6$ , 1H, CHP), 7.16 (bs, 5H,  $\text{C}_{2'-4'}\text{H}$ ), 7.22-7.31 (m, 2H,  $\text{C}_3^{\text{I}}$ H), 7.33-7.42 (m, 1H,  $\text{C}_4^{\text{I}}$ H), 7.43-7.59 (m, 5H,  $\text{C}_2^{\text{II}}$ H,  $\text{C}_4^{\text{II}}$ H), 7.85-7.97 (m, 2H,  $\text{C}_3^{\text{II}}$ H);  $[\text{M}+\text{H}]^+_{\text{found}} = 390.1968$ ,  $\text{C}_{25}\text{H}_{29}\text{NOP}$  requires 390.1981.

**Dimethyl ((phenylamino)(phenyl)methyl)phosphonate (5a)**

Yield: 92% (0.27 g) of compound **5a** as yellow crystal; Mp: 94-95 °C; Mp [S7]: 90-92 °C;  $^{31}\text{P}$  NMR ( $\text{CDCl}_3$ )  $\delta$  25.2;  $\delta$  [S8] ( $\text{CDCl}_3$ ) 25.3;  $[\text{M}+\text{H}]^+_{\text{found}} = 292.1103$ ,  $\text{C}_{15}\text{H}_{19}\text{NO}_3\text{P}$  requires 292.1097.

**Diethyl ((phenylamino)(phenyl)methyl)phosphonate (5b)**

Yield: 93% (0.29 g) of compound **5b** as pale blue crystal; Mp: 91-92 °C; Mp [S9]: 90-91 °C;  $^{31}\text{P}$  NMR ( $\text{CDCl}_3$ )  $\delta$  22.8;  $\delta$  [S9] ( $\text{CDCl}_3$ ) 23.2;  $[\text{M}+\text{H}]^+_{\text{found}} = 320.1418$ ,  $\text{C}_{17}\text{H}_{23}\text{NO}_3\text{P}$  requires 320.1410.

**Dibutyl ((phenylamino)(phenyl)methyl)phosphonate (5c)**

Yield: 97% (0.36 g) of compound **5c** as greenish-blue oil;  $^{31}\text{P}$  NMR ( $\text{CDCl}_3$ )  $\delta$  22.7;  $^{13}\text{C}$  NMR ( $\text{CDCl}_3$ ) 13.5 ( $\text{CH}_3^{\text{I}}$ ), 13.6 ( $\text{CH}_3^{\text{II}}$ ), 18.6 ( $\text{CH}_3\text{CH}_2^{\text{I}}$ ), 18.7 ( $\text{CH}_3\text{CH}_2^{\text{II}}$ ), 32.4 (d,  $^3J_{\text{CP}} = 5.7$ ,  $\text{CH}_2\text{CH}_2\text{O}^{\text{I}}$ ), 32.6 (d,  $^3J_{\text{CP}} = 5.7$ ,  $\text{CH}_2\text{CH}_2\text{O}^{\text{II}}$ ), 56.1 (d,  $^1J_{\text{CP}} = 150.8$ , CHP), 67.0 (d,  $^2J_{\text{CP}} = 7.4$ ,  $\text{CH}_2\text{O}^{\text{I}}$ ), 67.1 (d,  $^2J_{\text{CP}} = 7.5$ ,  $\text{CH}_2\text{O}^{\text{II}}$ ), 113.9 ( $\text{C}_2$ ), 118.4 ( $\text{C}_4$ ), 127.90 (d,  $^3J_{\text{CP}} = 5.6$ ,  $\text{C}_2'$ ), 127.92 (d,  $J_{\text{CP}} = 2.8$ ,  $\text{C}_4'$ ), 128.6 (d,  $J_{\text{CP}} = 2.7$ ,  $\text{C}_3'$ ), 129.2 ( $\text{C}_3$ ), 136.0 (d,  $^2J_{\text{CP}} = 2.7$ ,  $\text{C}_1'$ ), 146.4 (d,  $^3J_{\text{CP}} = 14.5$ ,  $\text{C}_1$ );  $\delta$  [S10] ( $\text{CDCl}_3$ ) 13.33, 13.37, 13.39, 18.35, 18.49, 18.55, 32.13, 32.2, 32.26, 32.33, 32.39, 55.13, 56.63, 65.28, 65.35, 66.65, 66.72, 66.74, 66.81, 113.66, 113.69, 118.16, 127.72, 128.37, 128.43, 135.86, 135.88, 146.14, 146.28;  $^1\text{H}$  NMR ( $\text{CDCl}_3$ )  $\delta$  0.82 (t,  $J_{\text{HH}} = 7.3$ , 3H,  $\text{CH}_3^{\text{I}}$ ), 0.88 (t,  $J_{\text{HH}} = 7.3$ , 3H,  $\text{CH}_3^{\text{II}}$ ), 1.16-1.29 (m, 2H,  $\text{CH}_3\text{CH}_2^{\text{I}}$ ), 1.29-1.49 (m, 4H,  $\text{CH}_3\text{CH}_2^{\text{II}}$ ,  $\text{CH}_2\text{CH}_2\text{O}^{\text{I}}$ ), 1.51-1.72 (m, 2H,  $\text{CH}_2\text{CH}_2\text{O}^{\text{II}}$ ), 3.53-3.68 (m, 1H,  $\text{CH}_A$ ,  $\text{CH}_2\text{O}^{\text{I}}$ ), 3.81-3.94 (m, 1H,  $\text{CH}_B$ ,  $\text{CH}_2\text{O}^{\text{I}}$ ), 3.95-4.14 (m, 2H,  $\text{CH}_2\text{O}^{\text{II}}$ ), 4.77 (d,  $J_{\text{HP}} = 24.2$ , CHP), 5.32 (bs, 1H, NH), 6.60 (d,  $J_{\text{HH}} = 7.8$ , 2H,  $\text{C}_2\text{H}$ ), 6.68 (t,  $J_{\text{HH}} = 7.3$ , 1H,  $\text{C}_4\text{H}$ ), 7.09 (t,  $J_{\text{HH}} = 7.9$ , 2H,  $\text{C}_3\text{H}$ ), 7.20-7.38 (m, 3H,  $\text{C}_2'\text{H}$ ,  $\text{C}_4'\text{H}$ ), 7.42-7.51 (m, 2H,  $\text{C}_3'\text{H}$ );  $\delta$  [S10] ( $\text{CDCl}_3$ ) 0.82 (t,  $J = 7.4$ , 3H), 0.88 (t,  $J = 7.4$ , 3H), 1.17-1.27 (m, 8H), 3.54-4.14 (m, 5H), 4.73 (d,  $J = 24.2$ , 1H), 6.57-6.60 (m, 2H), 6.66-6.70 (m, 1H), 7.07-7.11 (m, 2H), 7.30-7.33 (m, 3H), 7.45-7.48 (m, 2H);  $[\text{M}+\text{H}]^+_{\text{found}} = 376.2044$ ,  $\text{C}_{21}\text{H}_{31}\text{NO}_3\text{P}$  requires 376.2036.

**Dibenzyl ((phenylamino)(phenyl)methyl)phosphonate (5d)**

Yield: 70% (0.31 g) of compound **5d** as yellow crystal; Mp: 118-119 °C;  $^{31}\text{P}$  NMR ( $\text{CDCl}_3$ )  $\delta$  23.6;  $^{13}\text{C}$  NMR ( $\text{CDCl}_3$ ) 56.3 (d,  $^1J_{\text{CP}} = 150.4$ , CHP), 68.5 (d,  $^2J_{\text{CP}} = 6.9$ ,  $\text{CH}_2\text{O}^{\text{I}}$ ), 68.6 (d,  $^2J_{\text{CP}} = 7.0$ ,  $\text{CH}_2\text{O}^{\text{II}}$ ), 113.9 ( $\text{C}_2$ ), 118.5 ( $\text{C}_4$ ), 127.88 ( $\text{C}_2'^{\text{I}}$ ), 127.93 (d,  $^3J_{\text{CP}} = 5.6$ ,  $\text{C}_2'$ ), 127.98 (d,  $J_{\text{CP}} = 2.4$ ,  $\text{C}_4'$ ), 128.05 ( $\text{C}_2'^{\text{II}}$ ), 128.4 ( $\text{C}_4'^{\text{I}}$ ), 128.46 ( $\text{C}_4'^{\text{II}}$ ), 128.49 ( $\text{C}_3'^{\text{I}}$ ), 128.6 ( $\text{C}_3'^{\text{II}}$ ), 128.7 (d,  $J_{\text{CP}} = 2.7$ ,  $\text{C}_3'$ ), 129.1 ( $\text{C}_3$ ), 135.7 (d,  $^2J_{\text{CP}} = 2.6$ ,  $\text{C}_1'$ ), 135.9 (d,  $^3J_{\text{CP}} = 6.0$ ,  $\text{C}_1'^{\text{I}}$ ), 136.0 (d,  $^3J_{\text{CP}} = 5.8$ ,  $\text{C}_1'^{\text{II}}$ ), 146.1 (d,  $^3J_{\text{CP}} = 14.5$ ,  $\text{C}_1$ );  $^1\text{H}$  NMR ( $\text{CDCl}_3$ )  $\delta$  4.59 (dd,  $J_{\text{HP}} = 11.7$ ,  $J_{\text{HH}} = 8.3$ , 1H,  $\text{CH}_A$ ,  $\text{CH}_2\text{O}^{\text{I}}$ ), 4.69 (bs, 1H, NH), 4.80 (d,  $J_{\text{HP}} = 24.5$ , 1H, CHP), 4.86 (dd,  $J_{\text{HP}} = 11.7$ ,  $J_{\text{HH}} = 7.6$ , 1H,  $\text{CH}_B$ ,  $\text{CH}_2\text{O}^{\text{I}}$ ), 5.00 (qd,  $J_{\text{HP}} = 11.7$ ,  $J_{\text{HH}} = 8.4$ , 2H,  $\text{CH}_2\text{O}^{\text{II}}$ ), 6.53 (d,  $J_{\text{HH}} = 7.7$ , 2H,  $\text{C}_2\text{H}$ ), 6.68 (t,  $J_{\text{HH}} = 7.3$ , 1H,  $\text{C}_4\text{H}$ ), 7.03-7.16 [7.08 (t,  $J_{\text{HH}} = 7.6$ , 2H,  $\text{C}_2\text{H}$ ) overlapped by the multiplet of  $\text{C}_4'\text{H}$  total int. 4H], 7.20-7.38 (m, 11H,  $\text{C}_2'\text{H}$ ,  $\text{C}_4'\text{H}$ ,  $\text{C}_2'^{\text{I}}\text{H}$ ,  $\text{C}_3'^{\text{I}}\text{H}$ ), 7.40-7.49 (m, 2H,  $\text{C}_3'\text{H}$ );  $[\text{M}+\text{H}]^+_{\text{found}} = 444.1717$ ,  $\text{C}_{27}\text{H}_{27}\text{NO}_3\text{P}$  requires 444.1723.

**((Phenylamino)(phenyl)methyl)diphenylphosphine oxide (5e)**

Yield: 89% (0.34 g) of compound **5e** as yellow crystal; Mp: 252-253 °C; Mp [S11]: 252 °C;  $^{31}\text{P}$  NMR ( $\text{CDCl}_3$ )  $\delta$  33.2;  $\delta$  [S12] ( $\text{CDCl}_3$ ) 33.6;  $[\text{M}+\text{H}]^+_{\text{found}} = 384.1525$ ,  $\text{C}_{25}\text{H}_{23}\text{NOP}$  requires 384.1512.

**Dimethyl ((butylamino)(2-chlorophenyl)methyl)phosphonate (6a)**

Yield: 91% (0.28 g) of compound **6a** as colorless oil;  $^{31}\text{P}$  NMR ( $\text{CDCl}_3$ )  $\delta$  25.5;  $^{13}\text{C}$  NMR ( $\text{CDCl}_3$ ) 13.9 ( $\text{CH}_3\text{CH}_2$ ), 20.2 ( $\text{CH}_3\text{CH}_2$ ), 31.9 (d,  $J_{\text{CP}} = 0.6$ ,  $\text{CH}_2\text{CH}_2\text{N}$ ), 47.5 (d,  $^3J_{\text{CP}} = 16.4$ ,  $\text{CH}_2\text{N}$ ), 53.3 (d,  $^2J_{\text{CP}} = 6.8$ ,  $\text{CH}_3\text{O}^{\text{I}}$ ), 53.9 (d,  $^2J_{\text{CP}} = 6.8$ ,  $\text{CH}_3\text{O}^{\text{II}}$ ), 55.8 (d,  $^1J_{\text{CP}} = 155.7$ ,  $\text{CHP}$ ), 127.2 (d,  $J_{\text{CP}} = 2.8$ ,  $\text{C}_5$ ), 128.9 (d,  $J_{\text{CP}} = 3.1$ ,  $\text{C}_3$ ), 129.3 (d,  $^3J_{\text{CP}} = 4.3$ ,  $\text{C}_6$ ), 129.5 (d,  $J_{\text{CP}} = 2.2$ ,  $\text{C}_4$ ), 134.3 (d,  $^2J_{\text{CP}} = 1.2$ ,  $\text{C}_1$ ), 134.6 (d,  $^3J_{\text{CP}} = 9.0$ ,  $\text{C}_2$ );  $^1\text{H}$  NMR ( $\text{CDCl}_3$ )  $\delta$  0.86 (t,  $J_{\text{HH}} = 7.3$ , 3H,  $\text{CH}_3\text{CH}_2$ ), 1.23-1.37 (m, 2H,  $\text{CH}_3\text{CH}_2$ ), 1.37-1.49 (m, 2H,  $\text{CH}_2\text{CH}_2\text{N}$ ), 1.69 (bs, 1H, NH), 2.46 (t,  $J_{\text{HH}} = 6.9$ , 2H,  $\text{CH}_2\text{N}$ ), 3.54 (d,  $J_{\text{HP}} = 10.5$ , 3H,  $\text{CH}_3\text{O}^{\text{I}}$ ), 3.84 (d,  $J_{\text{HP}} = 10.6$ , 3H,  $\text{CH}_3\text{O}^{\text{II}}$ ), 4.74 (d,  $J_{\text{HP}} = 21.4$ , 1H,  $\text{CHP}$ ), 7.23 (t,  $J_{\text{HH}} = 7.6$ , 1H,  $\text{C}_4\text{H}$ ), 7.32 (t,  $J_{\text{HH}} = 7.5$ , 1H,  $\text{C}_5\text{H}$ ), 7.38 (d,  $J_{\text{HH}} = 7.9$ , 1H,  $\text{C}_6\text{H}$ ), 7.64 (d,  $J_{\text{HH}} = 7.8$ , 1H,  $\text{C}_3\text{H}$ );  $[\text{M}+\text{H}]^+_{\text{found}} = 306.1029$ ,  $\text{C}_{13}\text{H}_{22}\text{NO}_3\text{PCl}$  requires 306.1020.

**Diethyl ((butylamino)(2-chlorophenyl)methyl)phosphonate (6b)**

Yield: 72% (0.24 g) of compound **6b** as colorless oil;  $^{31}\text{P}$  NMR ( $\text{CDCl}_3$ )  $\delta$  21.4;  $^{13}\text{C}$  NMR ( $\text{CDCl}_3$ ) 13.9 ( $\text{CH}_3\text{CH}_2\text{CH}_2$ ), 16.2 (d,  $^3J_{\text{CP}} = 5.8$ ,  $\text{CH}_3\text{CH}_2\text{O}^{\text{I}}$ ), 16.5 (d,  $^3J_{\text{CP}} = 5.9$ ,  $\text{CH}_3\text{CH}_2\text{O}^{\text{II}}$ ), 20.2 ( $\text{CH}_3\text{CH}_2\text{CH}_2$ ), 32.0 (d,  $J_{\text{CP}} = 0.6$ ,  $\text{CH}_2\text{CH}_2\text{N}$ ), 47.6 (d,  $^3J_{\text{CP}} = 16.3$ ,  $\text{CH}_2\text{N}$ ), 56.1 (d,  $^1J_{\text{CP}} = 155.3$ ,  $\text{CHP}$ ), 62.8 (d,  $^2J_{\text{CP}} = 7.1$ ,  $\text{CH}_2\text{O}^{\text{I}}$ ), 63.2 (d,  $^2J_{\text{CP}} = 6.9$ ,  $\text{CH}_2\text{O}^{\text{II}}$ ), 127.1 (d,  $J_{\text{CP}} = 3.0$ ,  $\text{C}_5$ ), 128.8 (d,  $J_{\text{CP}} = 3.0$ ,  $\text{C}_3$ ), 129.37 (d,  $^3J_{\text{CP}} = 4.3$ ,  $\text{C}_6$ ), 129.40 (d,  $J_{\text{CP}} = 2.1$ ,  $\text{C}_4$ ), 134.7 (d,  $^2J_{\text{CP}} = 1.6$ ,  $\text{C}_1$ ), 134.8 (d,  $^3J_{\text{CP}} = 8.7$ ,  $\text{C}_2$ );  $^1\text{H}$  NMR ( $\text{CDCl}_3$ )  $\delta$  0.85 (t,  $J_{\text{HH}} = 7.2$ , 3H,  $\text{CH}_3\text{CH}_2\text{CH}_2$ ), 1.11 (t,  $J_{\text{HH}} = 7.1$ , 3H,  $\text{CH}_3\text{CH}_2\text{O}^{\text{I}}$ ), 1.22-1.48 [1.33 (t,  $J_{\text{HH}} = 7.1$ ,  $\text{CH}_3\text{CH}_2\text{O}^{\text{II}}$ ) overlapped by the multiplet of  $\text{CH}_3\text{CH}_2\text{CH}_2$  total int. 7H], 1.88 (bs, 1H, NH), 2.47 (t,  $J_{\text{HH}} = 6.9$ , 2H,  $\text{CH}_2\text{N}$ ), 3.73-3.87 (m, 1H,  $\text{CH}_A$ ,  $\text{CH}_2\text{O}^{\text{I}}$ ), 3.87-4.02 (m, 1H,  $\text{CH}_B$ ,  $\text{CH}_2\text{O}^{\text{II}}$ ), 4.09-4.31 (m, 2H,  $\text{CH}_2\text{O}^{\text{II}}$ ), 4.70 (d,  $J_{\text{HP}} = 21.3$ , 1H,  $\text{CHP}$ ), 7.21 (t,  $J_{\text{HH}} = 7.6$ , 1H,  $\text{C}_4\text{H}$ ), 7.29 (d,  $J_{\text{HH}} = 7.7$ , 1H,  $\text{C}_6\text{H}$ ), 7.35 (t,  $J_{\text{HH}} = 7.8$ , 1H,  $\text{C}_5\text{H}$ ), 7.66 (d,  $J_{\text{HH}} = 7.7$ , 1H,  $\text{C}_3\text{H}$ );  $[\text{M}+\text{H}]^+_{\text{found}} = 334.1318$ ,  $\text{C}_{15}\text{H}_{26}\text{NO}_3\text{PCl}$  requires 334.1333.

**Dibutyl ((butylamino)(2-chlorophenyl)methyl)phosphonate (6c)**

Yield: 74% (0.29 g) of compound **6c** as colorless oil;  $^{31}\text{P}$  NMR ( $\text{CDCl}_3$ )  $\delta$  23.2;  $^{13}\text{C}$  NMR ( $\text{CDCl}_3$ ) 13.5 ( $\text{CH}_3(\text{CH}_2)_3\text{O}^{\text{I}}$ ), 13.6 ( $\text{CH}_3(\text{CH}_2)_3\text{O}^{\text{II}}$ ), 13.9 ( $\text{CH}_3(\text{CH}_2)_3\text{N}$ ), 18.5 ( $\text{CH}_2(\text{CH}_2)_2\text{O}^{\text{I}}$ ),

18.7 ( $\text{CH}_2(\text{CH}_2)_2\text{O}^{\text{II}}$ ), 20.2 ( $\text{CH}_2(\text{CH}_2)_2\text{N}$ ), 32.0 (d,  $J_{\text{CP}} = 0.6$ ,  $\text{CH}_2\text{CH}_2\text{N}$ ), 32.4 (d,  $^3J_{\text{CP}} = 5.9$ ,  $\text{CH}_2\text{CH}_2\text{O}^{\text{I}}$ ), 32.7 (d,  $^3J_{\text{CP}} = 5.8$ ,  $\text{CH}_2\text{CH}_2\text{O}^{\text{II}}$ ), 47.6 (d,  $^3J_{\text{CP}} = 16.4$ ,  $\text{CH}_2\text{N}$ ), 56.1 (d,  $^1J_{\text{CP}} = 155.6$ , CHP), 66.4 (d,  $^2J_{\text{CP}} = 7.4$ ,  $\text{CH}_2\text{O}^{\text{I}}$ ), 66.9 (d,  $^2J_{\text{CP}} = 7.1$ ,  $\text{CH}_2\text{O}^{\text{II}}$ ), 127.1 (d,  $J_{\text{CP}} = 2.9$ ,  $\text{C}_5$ ), 128.7 (d,  $J_{\text{CP}} = 2.9$ ,  $\text{C}_3$ ), 129.3 (d,  $J_{\text{CP}} = 2.0$ ,  $\text{C}_4$ ), 129.4 (d,  $^3J_{\text{CP}} = 4.3$ ,  $\text{C}_6$ ), 134.7 (d,  $^3J_{\text{CP}} = 8.8$ ,  $\text{C}_2$ ), 134.9 (d,  $^2J_{\text{CP}} = 1.5$ ,  $\text{C}_1$ );  $^1\text{H}$  NMR ( $\text{CDCl}_3$ )  $\delta$  0.82 (t,  $J_{\text{HH}} = 7.3$ , 3H,  $\text{CH}_3(\text{CH}_2)_3\text{O}^{\text{I}}$ ), 0.86 (t,  $J_{\text{HH}} = 7.0$ , 3H,  $\text{CH}_3(\text{CH}_2)_3\text{N}$ ), 0.93 (t,  $J_{\text{HH}} = 7.3$ , 3H,  $\text{CH}_3(\text{CH}_2)_3\text{O}^{\text{II}}$ ), 1.14-1.51 (m, 10H,  $\text{CH}_2\text{CH}_2\text{CH}_2\text{N}$ ,  $\text{CH}_2\text{CH}_2\text{CH}_2\text{O}$ ,  $\text{CH}_2\text{CH}_2\text{O}^{\text{I}}$ ), 1.60-1.72 (m, 2H,  $\text{CH}_2\text{CH}_2\text{O}^{\text{II}}$ ), 1.88 (bs, 1H, NH), 2.47 (t,  $J_{\text{HH}} = 6.6$ , 2H,  $\text{CH}_2\text{N}$ ), 3.67-3.80 (m, 1H,  $\text{CH}_A$ ,  $\text{CH}_2\text{O}^{\text{I}}$ ), 3.81-3.95 (m, 1H,  $\text{CH}_B$ ,  $\text{CH}_2\text{O}^{\text{I}}$ ), 4.03-4.23 (m, 2H,  $\text{CH}_2\text{O}^{\text{II}}$ ), 4.70 (d,  $J_{\text{HP}} = 21.3$ , CHP), 7.22 (t,  $J_{\text{HH}} = 7.6$ , 1H,  $\text{C}_4\text{H}$ ), 7.29 (d,  $J_{\text{HH}} = 6.8$ , 1H,  $\text{C}_6\text{H}$ ), 7.35 (t,  $J_{\text{HH}} = 7.7$ , 1H,  $\text{C}_5\text{H}$ ), 7.65 (d,  $J_{\text{HH}} = 7.7$ , 1H,  $\text{C}_3\text{H}$ );  $[\text{M}+\text{H}]^+_{\text{found}} = 390.1950$ ,  $\text{C}_{19}\text{H}_{34}\text{NO}_3\text{PCl}$  requires 390.1959.

#### Dimethyl ((butylamino)(3-chlorophenyl)methyl)phosphonate (7a)

Yield: 80% (0.24 g) of compound **7a** as pale yellow oil;  $^{31}\text{P}$  NMR ( $\text{CDCl}_3$ )  $\delta$  25.2;  $^{13}\text{C}$  NMR ( $\text{CDCl}_3$ ) 13.9 ( $\text{CH}_3\text{CH}_2$ ), 20.2 ( $\text{CH}_3\text{CH}_2$ ), 31.9 (d,  $J_{\text{CP}} = 0.7$ ,  $\text{CH}_2\text{CH}_2\text{N}$ ), 47.8 (d,  $^3J_{\text{CP}} = 16.5$ ,  $\text{CH}_2\text{N}$ ), 53.6 (d,  $^2J_{\text{CP}} = 6.9$ ,  $\text{CH}_3\text{O}^{\text{I}}$ ), 53.8 (d,  $^2J_{\text{CP}} = 7.1$ ,  $\text{CH}_3\text{O}^{\text{II}}$ ), 60.5 (d,  $^1J_{\text{CP}} = 153.1$ , CHP), 126.6 (d,  $^3J_{\text{CP}} = 6.0$ ,  $\text{C}_6$ ), 128.1 (d,  $J_{\text{CP}} = 3.2$ ,  $\text{C}_5$ ), 128.5 (d,  $^3J_{\text{CP}} = 6.3$ ,  $\text{C}_2$ ), 129.7 (d,  $J_{\text{CP}} = 2.6$ ,  $\text{C}_4$ ), 134.5 (d,  $^2J_{\text{CP}} = 2.8$ ,  $\text{C}_1$ ), 138.4 (d,  $J_{\text{CP}} = 9.0$ ,  $\text{C}_3$ );  $^1\text{H}$  NMR ( $\text{CDCl}_3$ )  $\delta$  0.87 (t,  $J_{\text{HH}} = 7.2$ , 3H,  $\text{CH}_3\text{CH}_2$ ), 1.23-1.37 (m, 2H,  $\text{CH}_3\text{CH}_2$ ), 1.37-1.51 (m, 2H,  $\text{CH}_2\text{CH}_2\text{N}$ ), 1.88 (bs, 1H, NH), 2.37-2.57 (m, 2H,  $\text{CH}_2\text{N}$ ), 3.62 (d,  $J_{\text{HP}} = 10.5$ , 3H,  $\text{CH}_3\text{O}^{\text{I}}$ ), 3.75 (d,  $J_{\text{HP}} = 10.5$ , 3H,  $\text{CH}_3\text{O}^{\text{II}}$ ), 4.03 (d,  $J_{\text{HP}} = 20.3$ , 1H, CHP), 7.25-7.33 (m, 3H,  $\text{C}_{4-6}\text{H}$ ), 7.41 (s, 1H,  $\text{C}_2\text{H}$ );  $[\text{M}+\text{H}]^+_{\text{found}} = 306.1016$ ,  $\text{C}_{13}\text{H}_{22}\text{NO}_3\text{PCl}$  requires 306.1020.

#### Diethyl ((butylamino)(3-chlorophenyl)methyl)phosphonate (7b)

Yield: 94% (0.31 g) of compound **7b** as pale yellow oil;  $^{31}\text{P}$  NMR ( $\text{CDCl}_3$ )  $\delta$  22.7;  $^{13}\text{C}$  NMR ( $\text{CDCl}_3$ ) 13.9 ( $\text{CH}_3\text{CH}_2\text{CH}_2$ ), 16.3 (d,  $^3J_{\text{CP}} = 5.8$ ,  $\text{CH}_3\text{CH}_2\text{O}^{\text{I}}$ ), 16.4 (d,  $^3J_{\text{CP}} = 5.8$ ,  $\text{CH}_3\text{CH}_2\text{O}^{\text{II}}$ ), 20.3 ( $\text{CH}_3\text{CH}_2\text{CH}_2$ ), 31.9 (d,  $J_{\text{CP}} = 0.5$ ,  $\text{CH}_2\text{CH}_2\text{N}$ ), 47.9 (d,  $^3J_{\text{CP}} = 16.4$ ,  $\text{CH}_2\text{N}$ ), 60.9 (d,  $^1J_{\text{CP}} = 152.2$ , CHP), 62.9 (d,  $^2J_{\text{CP}} = 6.9$ ,  $\text{CH}_2\text{O}^{\text{I}}$ ), 63.1 (d,  $^2J_{\text{CP}} = 7.1$ ,  $\text{CH}_2\text{O}^{\text{II}}$ ), 126.7 (d,  $^3J_{\text{CP}} = 5.9$ ,  $\text{C}_6$ ), 127.9 (d,  $J_{\text{CP}} = 3.2$ ,  $\text{C}_5$ ), 128.6 (d,  $^3J_{\text{CP}} = 6.1$ ,  $\text{C}_2$ ), 129.6 (d,  $J_{\text{CP}} = 2.6$ ,  $\text{C}_4$ ), 134.3 (d,  $^2J_{\text{CP}} = 3.0$ ,  $\text{C}_1$ ), 138.6 (d,  $J_{\text{CP}} = 4.5$ ,  $\text{C}_3$ );  $^1\text{H}$  NMR ( $\text{CDCl}_3$ )  $\delta$  0.87 (t,  $J_{\text{HH}} = 7.2$ , 3H,  $\text{CH}_3\text{CH}_2\text{CH}_2$ ), 1.19 (t,  $J_{\text{HH}} = 7.0$ , 3H,  $\text{CH}_3\text{CH}_2\text{O}^{\text{I}}$ ), 1.24-1.37 [1.28 (t,  $J_{\text{HH}} = 7.1$ ,  $\text{CH}_3\text{CH}_2\text{O}^{\text{II}}$ ) overlapped by the multiplet of  $\text{CH}_3\text{CH}_2\text{CH}_2$  total int. 5H], 1.38-1.50 (m, 2H,  $\text{CH}_2\text{CH}_2\text{N}$ ), 2.02 (bs, 1H, NH), 2.38-2.58 (m, 2H,  $\text{CH}_2\text{N}$ ), 3.85-4.16 [4.01 (d,  $J_{\text{HP}} = 19.9$ , CHP) overlapped by

the multiplet of CH<sub>2</sub>O total int. 5H], 7.22-7.36 (m, 3H, C<sub>4-6</sub>H), 7.42 (s, 1H, C<sub>2</sub>H); [M+H]<sup>+</sup><sub>found</sub> = 334.1336, C<sub>15</sub>H<sub>26</sub>NO<sub>3</sub>PCl requires 334.1333.

#### **Dibutyl ((butylamino)(3-chlorophenyl)methyl)phosphonate (7c)**

Yield: 73% (0.28 g) of compound **7c** as pale yellow oil; <sup>31</sup>P NMR (CDCl<sub>3</sub>) δ 22.8; <sup>13</sup>C NMR (CDCl<sub>3</sub>) 13.56 (CH<sub>3</sub>(CH<sub>2</sub>)<sub>3</sub>O<sup>I</sup>), 13.60 (CH<sub>3</sub>(CH<sub>2</sub>)<sub>3</sub>O<sup>II</sup>), 13.9 (CH<sub>3</sub>(CH<sub>2</sub>)<sub>3</sub>N), 18.6 (CH<sub>2</sub>(CH<sub>2</sub>)<sub>2</sub>O<sup>I</sup>), 18.7 (CH<sub>2</sub>(CH<sub>2</sub>)<sub>2</sub>O<sup>II</sup>), 20.2 (CH<sub>2</sub>(CH<sub>2</sub>)<sub>2</sub>N), 32.0 (d, *J*<sub>CP</sub> = 0.5, CH<sub>2</sub>CH<sub>2</sub>N), 32.5 (d, <sup>3</sup>*J*<sub>CP</sub> = 5.9, CH<sub>2</sub>CH<sub>2</sub>O<sup>I</sup>), 32.6 (d, <sup>3</sup>*J*<sub>CP</sub> = 5.9, CH<sub>2</sub>CH<sub>2</sub>O<sup>II</sup>), 47.9 (d, <sup>3</sup>*J*<sub>CP</sub> = 16.4, CH<sub>2</sub>N), 60.9 (d, <sup>1</sup>*J*<sub>CP</sub> = 152.2, CHP), 66.6 (d, <sup>2</sup>*J*<sub>CP</sub> = 7.2, CH<sub>2</sub>O<sup>I</sup>), 66.8 (d, <sup>2</sup>*J*<sub>CP</sub> = 7.3, CH<sub>2</sub>O<sup>II</sup>), 126.7 (d, <sup>3</sup>*J*<sub>CP</sub> = 5.9, C<sub>6</sub>), 127.9 (d, *J*<sub>CP</sub> = 3.2, C<sub>5</sub>), 128.6 (d, <sup>3</sup>*J*<sub>CP</sub> = 6.1, C<sub>2</sub>), 129.6 (d, *J*<sub>CP</sub> = 2.7, C<sub>4</sub>), 134.3 (d, <sup>2</sup>*J*<sub>CP</sub> = 2.9, C<sub>1</sub>), 138.8 (d, *J*<sub>CP</sub> = 4.6, C<sub>3</sub>); <sup>1</sup>H NMR (CDCl<sub>3</sub>) δ 0.866 (t, *J*<sub>HH</sub> = 7.3, 3H, CH<sub>3</sub>(CH<sub>2</sub>)<sub>3</sub>O<sup>I</sup>), 0.870 (t, *J*<sub>HH</sub> = 7.2, 3H, CH<sub>3</sub>(CH<sub>2</sub>)<sub>3</sub>N), 0.91 (t, *J*<sub>HH</sub> = 7.2, 3H, CH<sub>3</sub>(CH<sub>2</sub>)<sub>3</sub>O<sup>II</sup>), 1.20-1.55 (m, 10H, CH<sub>2</sub>CH<sub>2</sub>CH<sub>2</sub>N, CH<sub>2</sub>CH<sub>2</sub>CH<sub>2</sub>O, CH<sub>2</sub>CH<sub>2</sub>O<sup>I</sup>), 1.55-1.64 (m, 2H, CH<sub>2</sub>CH<sub>2</sub>O<sup>II</sup>), 1.85 (bs, 1H, NH), 2.38-2.57 (m, 2H, CH<sub>2</sub>N), 3.80-3.96 (m, 2H, CH<sub>2</sub>O<sup>I</sup>), 3.96-4.09 [4.01 (d, *J*<sub>HP</sub> = 20.0, CHP) overlapped by the multiplet of CH<sub>2</sub>O<sup>II</sup> total int. 3H], 7.22-7.34 (m, 3H, C<sub>4-6</sub>H), 7.41 (s, 1H, C<sub>2</sub>H); [M+H]<sup>+</sup><sub>found</sub> = 390.1946, C<sub>19</sub>H<sub>34</sub>NO<sub>3</sub>PCl requires 390.1959.

#### **Dimethyl ((butylamino)(4-chlorophenyl)methyl)phosphonate (8a)**

Yield: 75% (0.23 g) of compound **8a** as pale yellow oil; <sup>31</sup>P NMR (CDCl<sub>3</sub>) δ 25.4; <sup>13</sup>C NMR (CDCl<sub>3</sub>) 13.9 (CH<sub>3</sub>CH<sub>2</sub>), 20.3 (CH<sub>3</sub>CH<sub>2</sub>), 32.0 (d, *J*<sub>CP</sub> = 0.5, CH<sub>2</sub>CH<sub>2</sub>N), 47.7 (d, <sup>3</sup>*J*<sub>CP</sub> = 16.6, CH<sub>2</sub>N), 53.5 (d, <sup>2</sup>*J*<sub>CP</sub> = 7.0, CH<sub>3</sub>O<sup>I</sup>), 53.8 (d, <sup>2</sup>*J*<sub>CP</sub> = 7.1, CH<sub>3</sub>O<sup>II</sup>), 60.3 (d, <sup>1</sup>*J*<sub>CP</sub> = 153.4, CHP), 128.7 (d, *J*<sub>CP</sub> = 2.6, C<sub>3</sub>), 129.7 (d, <sup>3</sup>*J*<sub>CP</sub> = 6.2, C<sub>2</sub>), 133.7 (d, <sup>2</sup>*J*<sub>CP</sub> = 3.9, C<sub>1</sub>), 134.6 (d, *J*<sub>CP</sub> = 4.5, C<sub>4</sub>); <sup>1</sup>H NMR (CDCl<sub>3</sub>) δ 0.86 (t, *J*<sub>HH</sub> = 7.2, 3H, CH<sub>3</sub>CH<sub>2</sub>), 1.24-1.35 (m, 2H, CH<sub>3</sub>CH<sub>2</sub>), 1.37-1.48 (m, 2H, CH<sub>2</sub>CH<sub>2</sub>N), 1.85 (bs, 1H, NH), 2.35-2.55 (m, 2H, CH<sub>2</sub>N), 3.60 (d, *J*<sub>HP</sub> = 10.5, 3H, CH<sub>3</sub>O<sup>I</sup>), 3.74 (d, *J*<sub>HP</sub> = 10.5, 3H, CH<sub>3</sub>O<sup>II</sup>), 4.04 (d, *J*<sub>HP</sub> = 20.0, 1H, CHP), 7.30-7.40 (m, 4H, ArH); [M+H]<sup>+</sup><sub>found</sub> = 306.1014, C<sub>13</sub>H<sub>22</sub>NO<sub>3</sub>PCl requires 306.1020.

#### **Diethyl ((butylamino)(4-chlorophenyl)methyl)phosphonate (8b)**

Yield: 80% (0.27 g) of compound **8b** as pale yellow oil; <sup>31</sup>P NMR (CDCl<sub>3</sub>) δ 23.0; <sup>13</sup>C NMR (CDCl<sub>3</sub>) 13.9 (CH<sub>3</sub>CH<sub>2</sub>CH<sub>2</sub>), 16.4 (d, <sup>3</sup>*J*<sub>CP</sub> = 5.7, CH<sub>3</sub>CH<sub>2</sub>O<sup>I</sup>), 16.5 (d, <sup>3</sup>*J*<sub>CP</sub> = 5.7, CH<sub>3</sub>CH<sub>2</sub>O<sup>II</sup>), 20.3 (CH<sub>3</sub>CH<sub>2</sub>CH<sub>2</sub>), 32.0 (d, *J*<sub>CP</sub> = 0.7, CH<sub>2</sub>CH<sub>2</sub>N), 47.8 (d, <sup>3</sup>*J*<sub>CP</sub> = 16.5, CH<sub>2</sub>N), 60.7 (d, <sup>1</sup>*J*<sub>CP</sub> = 152.6, CHP), 62.9 (d, <sup>2</sup>*J*<sub>CP</sub> = 7.0, CH<sub>2</sub>O<sup>I</sup>), 63.0 (d, <sup>2</sup>*J*<sub>CP</sub> = 7.1, CH<sub>2</sub>O<sup>II</sup>), 128.6 (d, *J*<sub>CP</sub> = 2.6, C<sub>3</sub>), 129.8 (d, <sup>3</sup>*J*<sub>CP</sub> = 6.1, C<sub>2</sub>), 133.5 (d, <sup>2</sup>*J*<sub>CP</sub> = 3.9, C<sub>1</sub>), 135.0 (d, *J*<sub>CP</sub> = 4.8, C<sub>4</sub>); δ [S10] (CDCl<sub>3</sub>) 16,16; 16,21; 16,33; 53,43; 54,72; 56,22; 63,23; 63,30; 63,33; 63,40; 113,78;

118,60; 118,74; 128,71; 128,74; 129,06; 129,11; 129,16; 129,36; 133,66; 134,53; 134,56; 145,89; 146,03; 152,64;  $^1\text{H}$  NMR ( $\text{CDCl}_3$ )  $\delta$  0.86 (t,  $J_{\text{HH}} = 7.2$ , 3H,  $\text{CH}_3\text{CH}_2\text{CH}_2$ ), 1.19 (t,  $J_{\text{HH}} = 7.1$ , 3H,  $\text{CH}_3\text{CH}_2\text{O}^{\text{I}}$ ), 1.23-1.36 [1.28 (t,  $J_{\text{HH}} = 7.0$ ,  $\text{CH}_3\text{CH}_2\text{O}^{\text{II}}$ ) overlapped by the multiplet of  $\text{CH}_3\text{CH}_2\text{CH}_2$  total int. 5H], 1.36-1.50 (m, 2H,  $\text{CH}_2\text{CH}_2\text{N}$ ), 1.90 (bs, 1H, NH), 2.36-2.56 (m, 2H,  $\text{CH}_2\text{N}$ ), 3.83-4.15 [4.01 (d,  $J_{\text{HP}} = 19.9$ , CHP) overlapped by the multiplet of  $\text{CH}_2\text{O}$  total int. 5H], 7.28-7.42 (m, 4H, ArH);  $\delta$  [S10] ( $\text{CDCl}_3$ ) 1,15 (t,  $J = 7.09$ , 3H), 1,28 (t,  $J = 7.09$ , 3H), 3,72-4,18 (m, 4H), 4,73 (d,  $J = 24.49$ , 1H), 6,54-6,57 (m, 2H), 6,68-6,72 (m, 1H), 7,07-7,12 (m, 2H), 7,29-7,31 (m, 2H), 7,39-7,42 (m, 2H);  $[\text{M}+\text{H}]^+_{\text{found}} = 334.1337$ ,  $\text{C}_{15}\text{H}_{26}\text{NO}_3\text{PCl}$  requires 334.1333.

### Dibutyl ((butylamino)(4-chlorophenyl)methyl)phosphonate (8c)

Yield: 81% (0.32 g) of compound **8c** as colorless oil;  $^{31}\text{P}$  NMR ( $\text{CDCl}_3$ )  $\delta$  23.5;  $^{13}\text{C}$  NMR ( $\text{CDCl}_3$ ) 13.56 ( $\text{CH}_3(\text{CH}_2)_3\text{O}^{\text{I}}$ ), 13.60 ( $\text{CH}_3(\text{CH}_2)_3\text{O}^{\text{II}}$ ), 13.9 ( $\text{CH}_3(\text{CH}_2)_3\text{N}$ ), 18.6 ( $\text{CH}_2(\text{CH}_2)_2\text{O}^{\text{I}}$ ), 18.7 ( $\text{CH}_2(\text{CH}_2)_2\text{O}^{\text{II}}$ ), 20.3 ( $\text{CH}_2(\text{CH}_2)_2\text{N}$ ), 32.0 (d,  $J_{\text{CP}} = 0.5$ ,  $\text{CH}_2\text{CH}_2\text{N}$ ), 32.5 (d,  $^3J_{\text{CP}} = 5.8$ ,  $\text{CH}_2\text{CH}_2\text{O}^{\text{I}}$ ), 32.6 (d,  $^3J_{\text{CP}} = 5.8$ ,  $\text{CH}_2\text{CH}_2\text{O}^{\text{II}}$ ), 47.9 (d,  $^3J_{\text{CP}} = 16.5$ ,  $\text{CH}_2\text{N}$ ), 60.7 (d,  $^1J_{\text{CP}} = 152.7$ , CHP), 66.5 (d,  $^2J_{\text{CP}} = 7.2$ ,  $\text{CH}_2\text{O}^{\text{I}}$ ), 66.7 (d,  $^2J_{\text{CP}} = 7.4$ ,  $\text{CH}_2\text{O}^{\text{II}}$ ), 128.5 (d,  $J_{\text{CP}} = 2.6$ ,  $\text{C}_3$ ), 129.8 (d,  $^3J_{\text{CP}} = 6.1$ ,  $\text{C}_2$ ), 133.5 (d,  $^2J_{\text{CP}} = 4.0$ ,  $\text{C}_1$ ), 135.1 (d,  $J_{\text{CP}} = 4.7$ ,  $\text{C}_4$ );  $^1\text{H}$  NMR ( $\text{CDCl}_3$ )  $\delta$  0.86 (t,  $J_{\text{HH}} = 7.2$ , 6H,  $\text{CH}_3(\text{CH}_2)_3\text{O}^{\text{I}}$ ,  $\text{CH}_3(\text{CH}_2)_3\text{N}$ ), 0.91 (t,  $J_{\text{HH}} = 7.4$ , 3H,  $\text{CH}_3(\text{CH}_2)_3\text{O}^{\text{II}}$ ), 1.20-1.53 (m, 10H,  $\text{CH}_2\text{CH}_2\text{CH}_2\text{N}$ ,  $\text{CH}_2\text{CH}_2\text{CH}_2\text{O}$ ,  $\text{CH}_2\text{CH}_2\text{O}^{\text{I}}$ ), 1.53-1.68 (m, 2H,  $\text{CH}_2\text{CH}_2\text{O}^{\text{II}}$ ), 1.81 (bs, 1H, NH), 2.36-2.56 (m, 2H,  $\text{CH}_2\text{N}$ ), 3.77-3.95 (m, 2H,  $\text{CH}_2\text{O}^{\text{I}}$ ), 3.95-4.08 [4.00 (d,  $J_{\text{HP}} = 19.8$ , CHP) overlapped by the multiplet of  $\text{CH}_2\text{O}^{\text{II}}$  total int. 3H], 7.26-7.40 (m, 4H, ArH);  $[\text{M}+\text{H}]^+_{\text{found}} = 390.1962$ ,  $\text{C}_{19}\text{H}_{34}\text{NO}_3\text{PCl}$  requires 390.1959.

### Real time monitoring of the addition of diethyl phosphite to *N*-benzylidene(butyl)amine

To the mixture of imine **1a** (30 mmol, 4.8 g) in 20 mL acetonitrile, diethyl phosphite (30 mmol, 3.9 mL) was added drop wise at rt with intensive stirring. After complete addition the mixture was heated gradually from 25 °C to 80 °C and stirred for 3.5 h at this temperature.

### Single crystal X-ray diffraction measurements

A crystal of **5b** was mounted on a glass fiber. Cell parameters were determined by least-squares from the respective setting angles. Completeness was equal or greater to  $2\theta = 99.4\%$  for **5b** and  $99.6\%$  for **5d**. Multi-scan absorption correction was applied to the data with minimum and maximum transmission factors of 0.809 and 1.00 for **5b** and 0.988 and 1.00 for **5d**, respectively. Initial structure models were obtained by direct methods [S13] and subsequent difference syntheses. Anisotropic full-matrix least-squares refinements on  $F^2$  were applied for all non-hydrogen atoms and the model was refined to convergence [S13]. Hydrogen atomic positions were calculated from assumed geometries where appropriate. N–H hydrogen atoms were located from difference electron density maps. Hydrogen atoms were included in structure factor calculations and the non-trivial hydrogen positions and their isotropic displacements were refined. Other H atoms were kept riding on their anchor atoms, with isotropic displacement parameters of these hydrogen atoms were approximated from the  $U(\text{eq})$  value of the atom they were bonded. The maximum and minimum residual electron densities in the final difference maps range 0.6 and  $-0.4 \text{ e}\cdot\text{\AA}^{-3}$  and were normal for both. All further calculations and drawings were done by using PLATON [S14] and Diamond [S15]. Crystal structure data are deposited with the Cambridge Crystallographic Data Centre under CCDC 1508647 (**5b**) and 1508648 (**5d**) and can be obtained free of charge upon application.

**Table S1:** Essential crystallographic data of the **5b** and **5d** single crystal diffraction experiments and model refinements.

|                                       | <b>5b</b>                                         | <b>5d</b>                                         |
|---------------------------------------|---------------------------------------------------|---------------------------------------------------|
| Formula                               | C <sub>17</sub> H <sub>22</sub> NO <sub>3</sub> P | C <sub>27</sub> H <sub>26</sub> NO <sub>3</sub> P |
| F. W.                                 | 319.32                                            | 443.46                                            |
| Space grp.                            | P-1 (No. 2)                                       | P-1 (No. 2)                                       |
| a, b, c [Å]                           | 8.7262(5) 9.8627(6) 10.0063(6)                    | 9.7723(5) 10.7780(6) 11.1060(7)                   |
| α, β, γ [°]                           | 94.125(5) 94.790(5) 91.430(5)                     | 101.830(5) 94.026(4) 90.170(4)                    |
| V [Å <sup>3</sup> ]                   | 855.54(9)                                         | 1141.90(11)                                       |
| Z                                     | 2                                                 | 2                                                 |
| D <sub>(c)</sub> [Mg/m <sup>3</sup> ] | 1.240                                             | 1.290                                             |
| μ(MoKα) [/mm]                         | 0.172                                             | 0.150                                             |
| Cryst. Size [mm]                      | 0.06 x 0.35 x 0.40                                | 0.08 x 0.15 x 0.15                                |
| Temp. (K)                             | 173                                               | 173                                               |
| Radiation λ [Å]                       | MoKα 0.71073                                      | MoKα 0.71073                                      |
| θ Min-Max [°]                         | 4.5, 26.4                                         | 4.2, 26.4                                         |
| Tot., Uniq. Data, R(int)              | 10779, 3477, 0.044                                | 14708, 4650, 0.043                                |
| Obsd data [I > 2.0 σ(I)]              | 2578                                              | 3473                                              |
| Nref, Npar                            | 3477, 219                                         | 4650, 315                                         |
| R <sub>1</sub> , wR <sup>2</sup> , S  | 0.0524, 0.1427, 1.06                              | 0.0427, 0.1054, 1.03                              |
| Max./ Av. Shift/Error                 | 0.00, 0.00                                        | 0.00, 0.00                                        |
| Min/Max Res.Den. [e/Å <sup>3</sup> ]  | -0.34, 0.62                                       | -0.36, 0.41                                       |

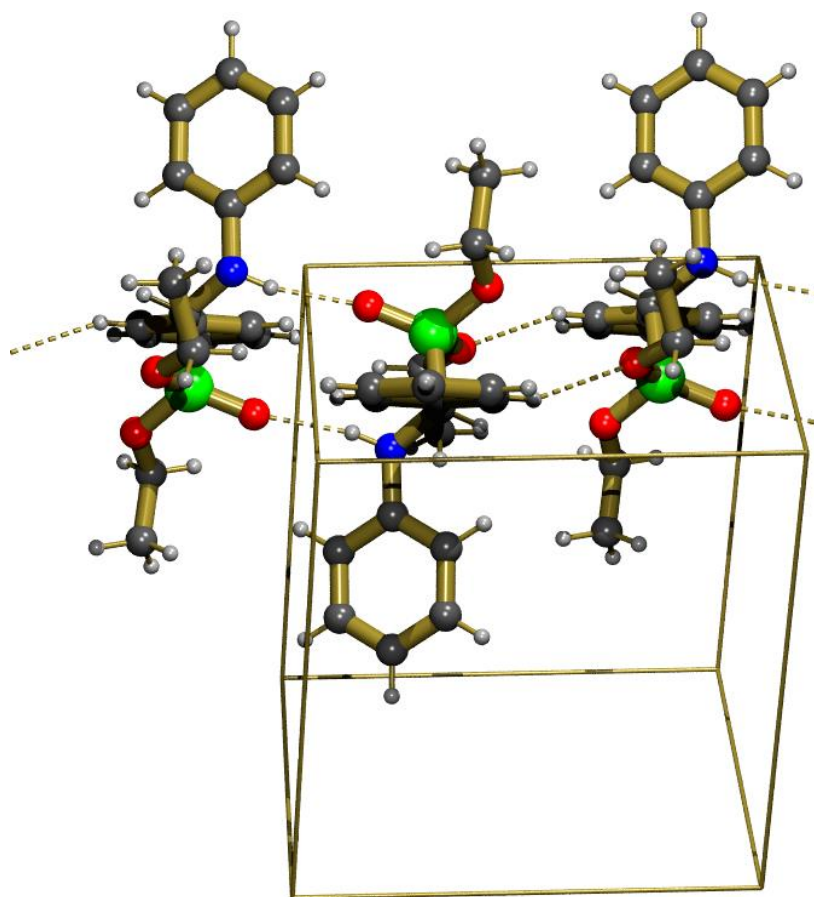

**Figure S1:** Pairs of **5b** molecules fused through N–H $\cdots$ O and C–H $\cdots$ O hydrogen bridges into *RS*-centrosymmetric dimeric infinite sheets. Broken lines indicate H-bridges.

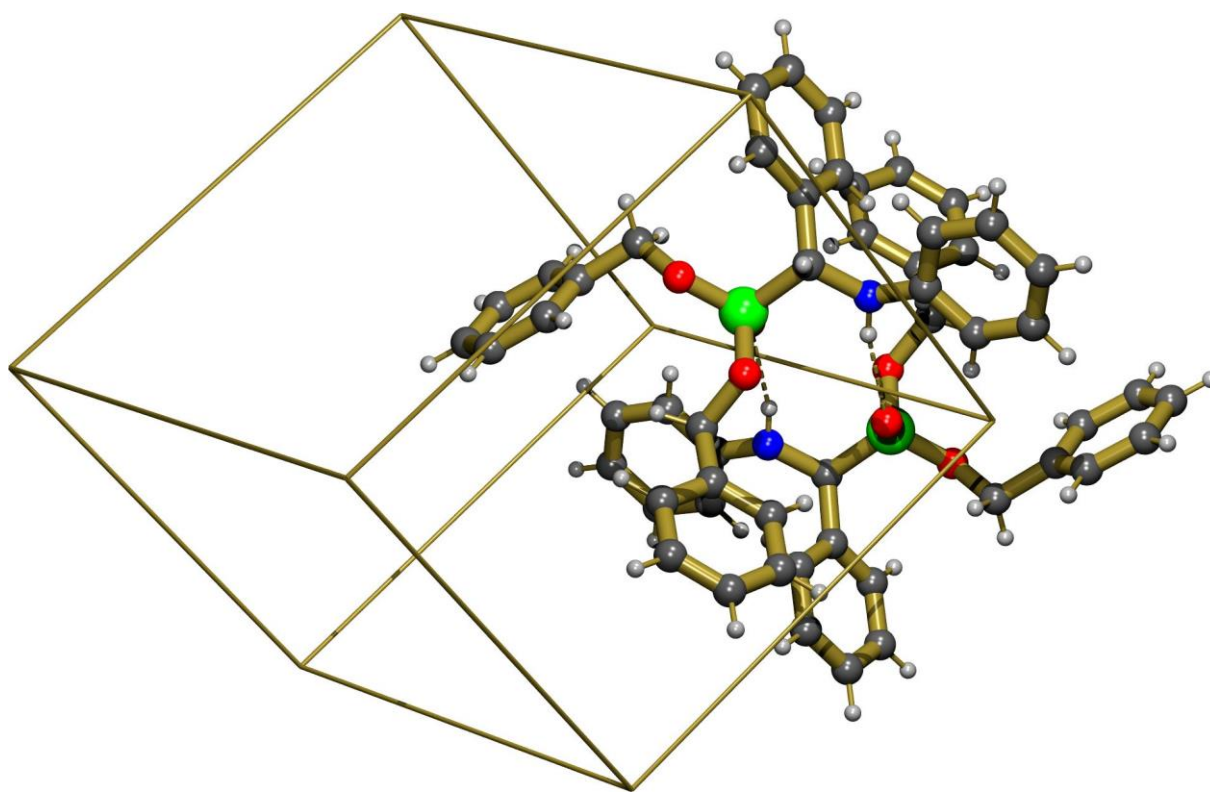

**Figure S2:** An isolated *RS* dimer of **5d** molecules formed around a symmetry center.

## Quantum chemical calculations

In all quantum chemical calculations, the B3LYP/6-31G(d,p) method [S16-S20] was used implemented in the Gaussian09 program package [S21]. During the calculations including geometry optimizations, scanning and IRC optimizations, transition-state determinations and frequency calculations, the IEFPCM [S22,S23] implicit method was used taking into account the effect of water as the solvent, approximating the dielectric constant of the reaction mixture. The reaction pathways and energetics were calculated by scanning and IRC calculations to verify that a calculated transition state indeed connects the two corresponding minima. The transition states were optimized with the QST3 method. Transition states were identified by having one imaginary frequency in the Hessian matrix. All the geometries and transition states were optimized and frequency calculations were made to assure that the structures are in a local minimum on a saddle point, respectively.

# <sup>31</sup>P NMR, <sup>1</sup>H NMR and <sup>13</sup>C NMR spectra

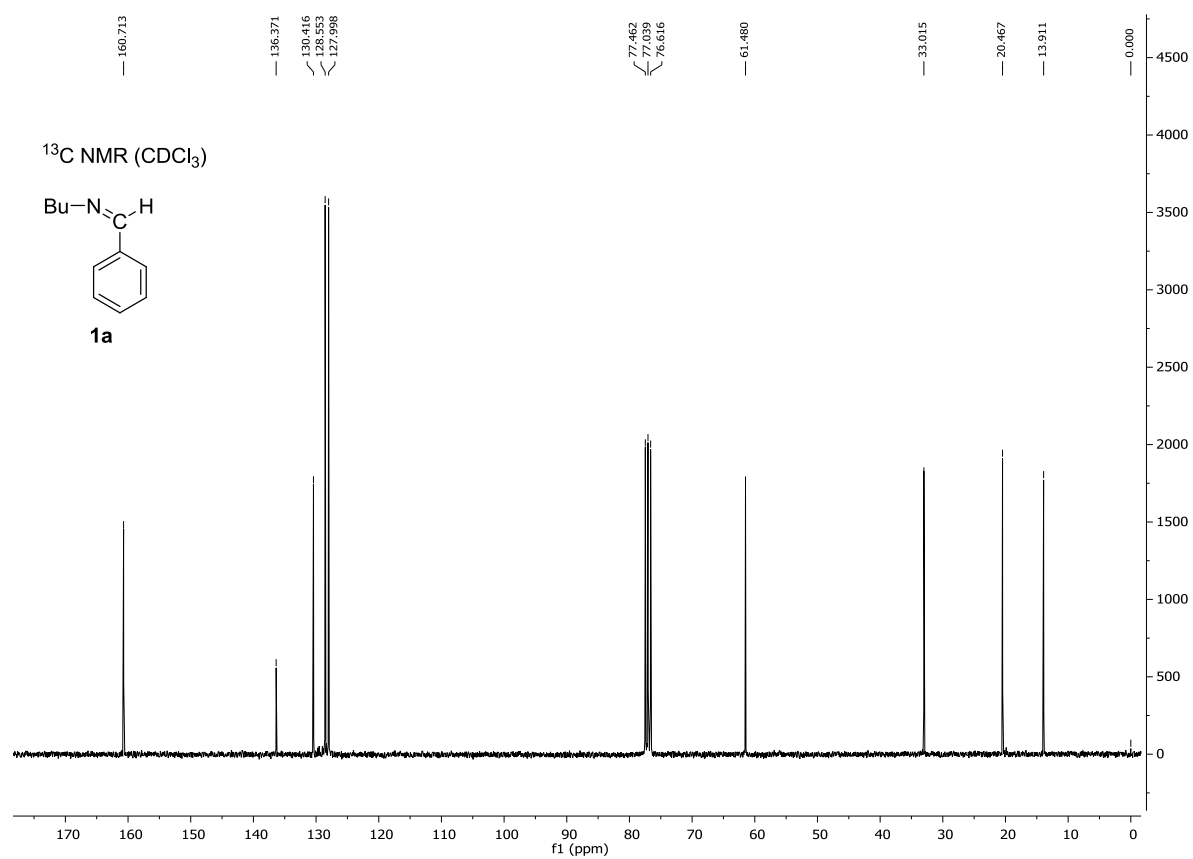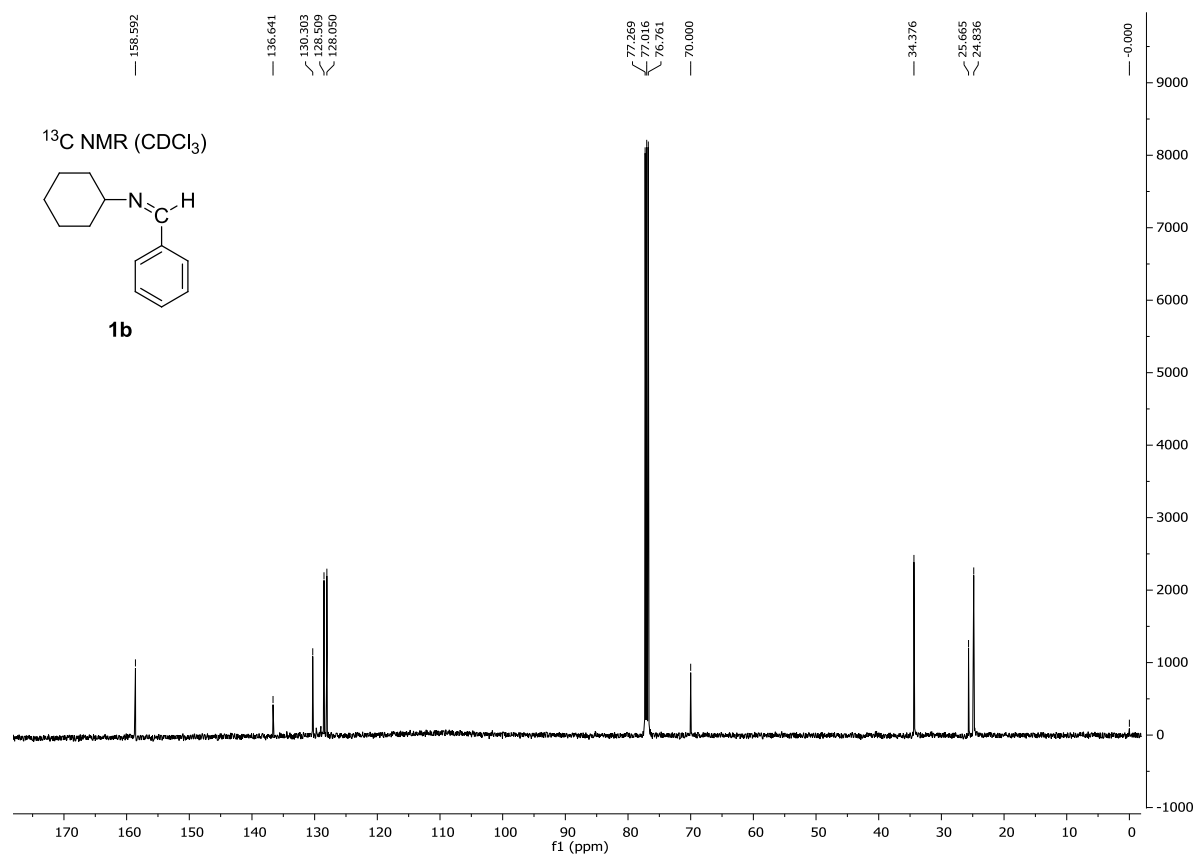

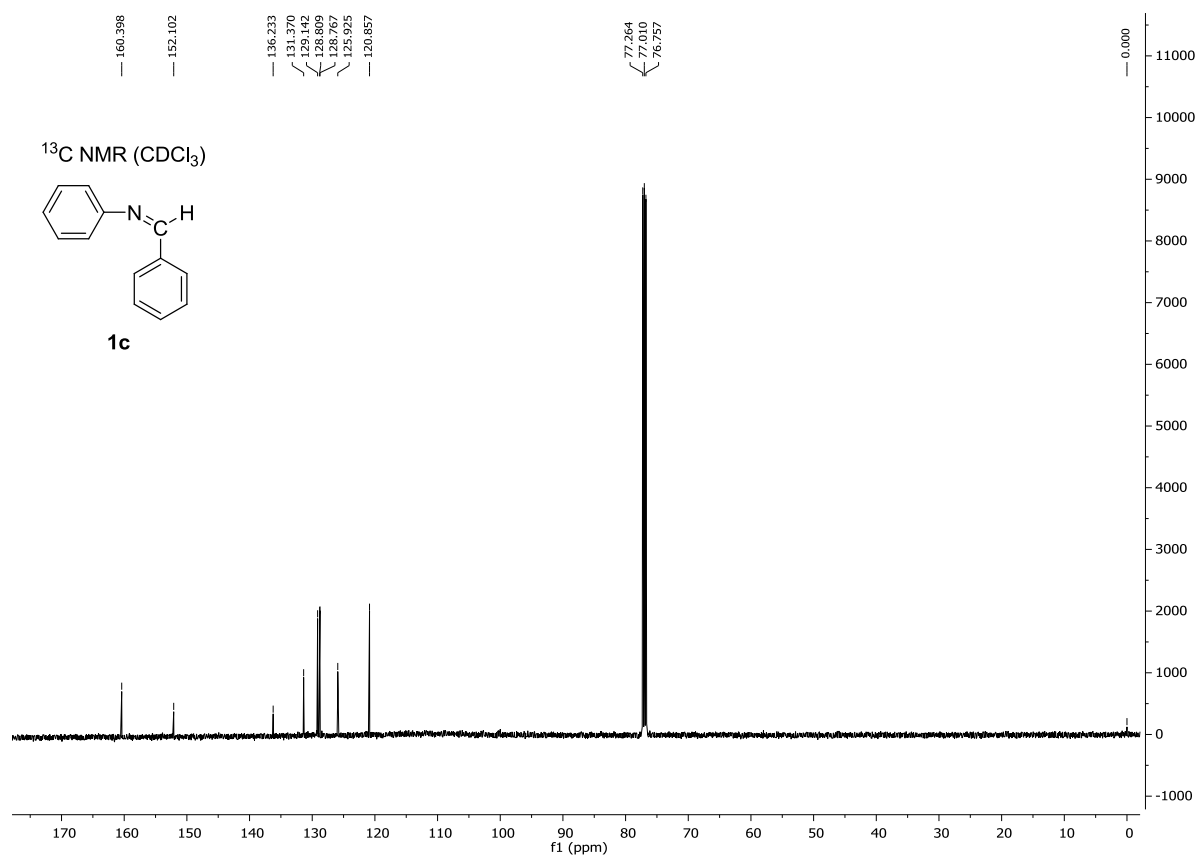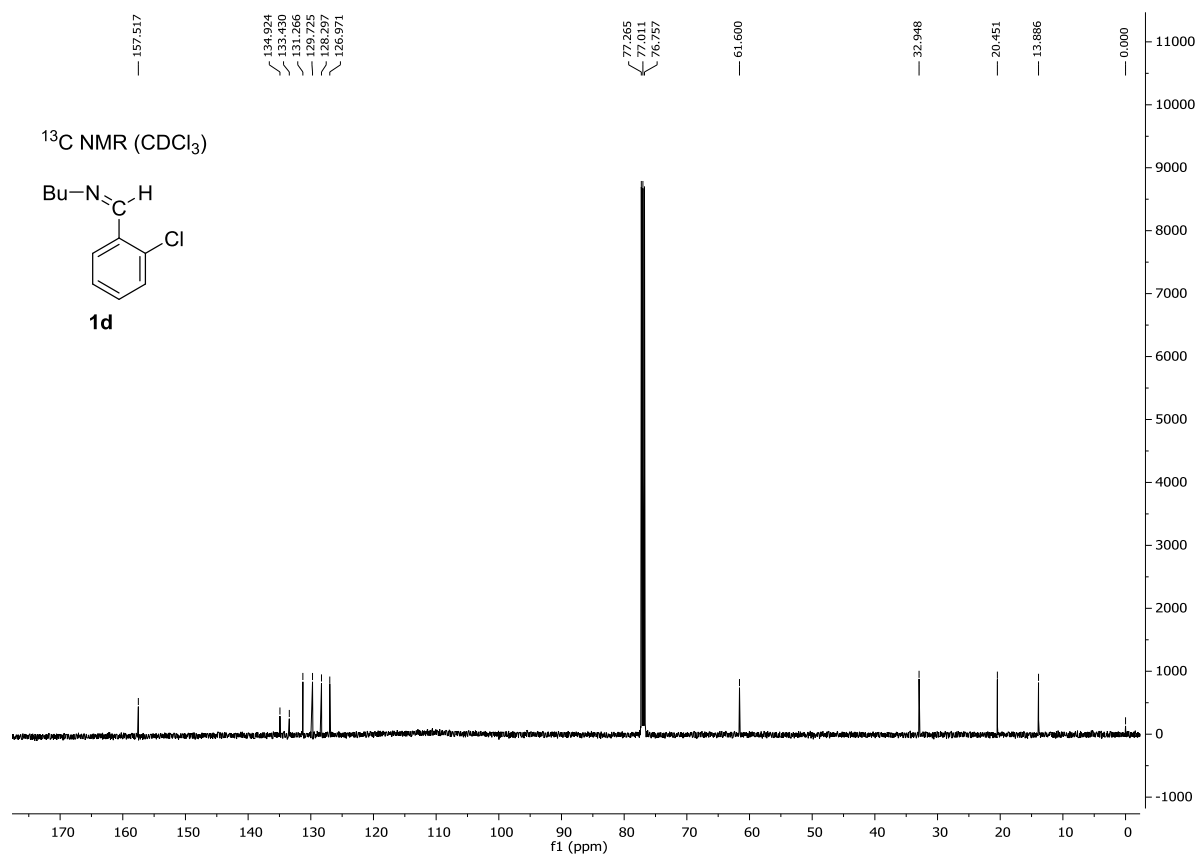

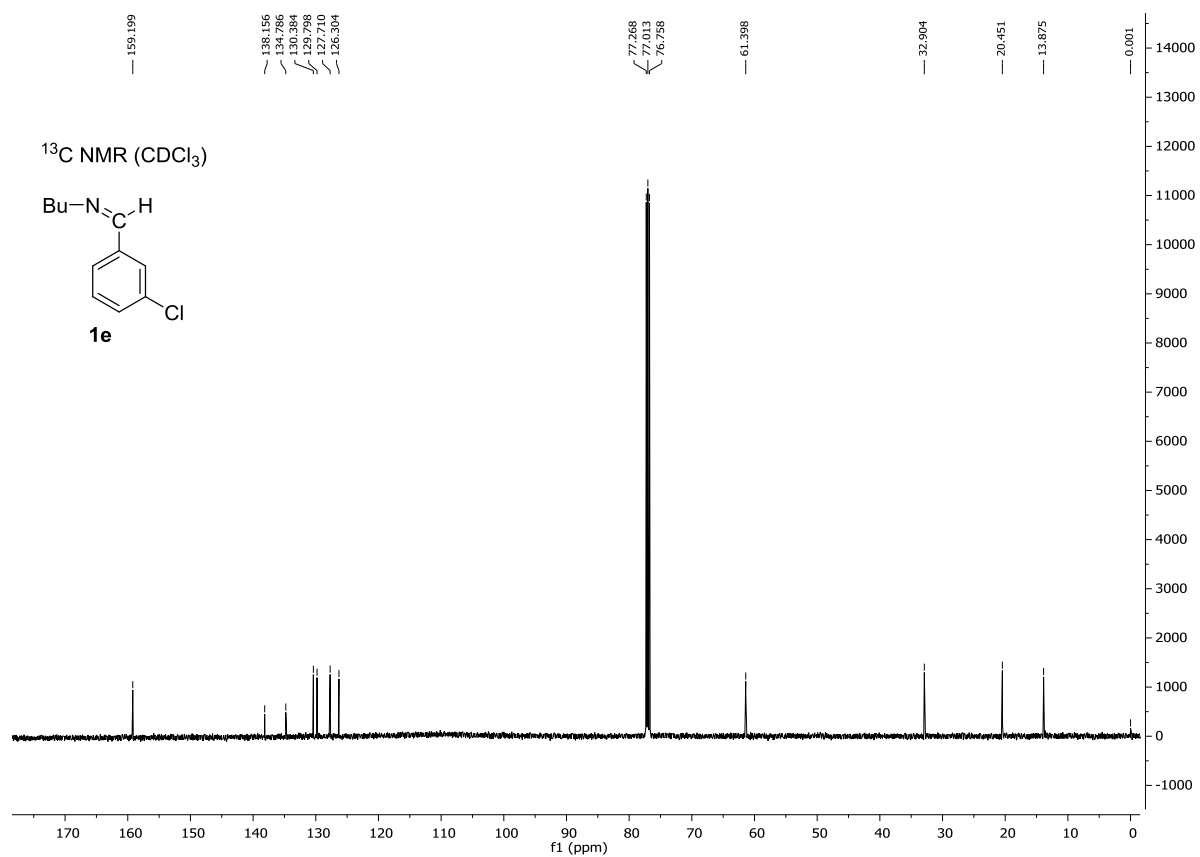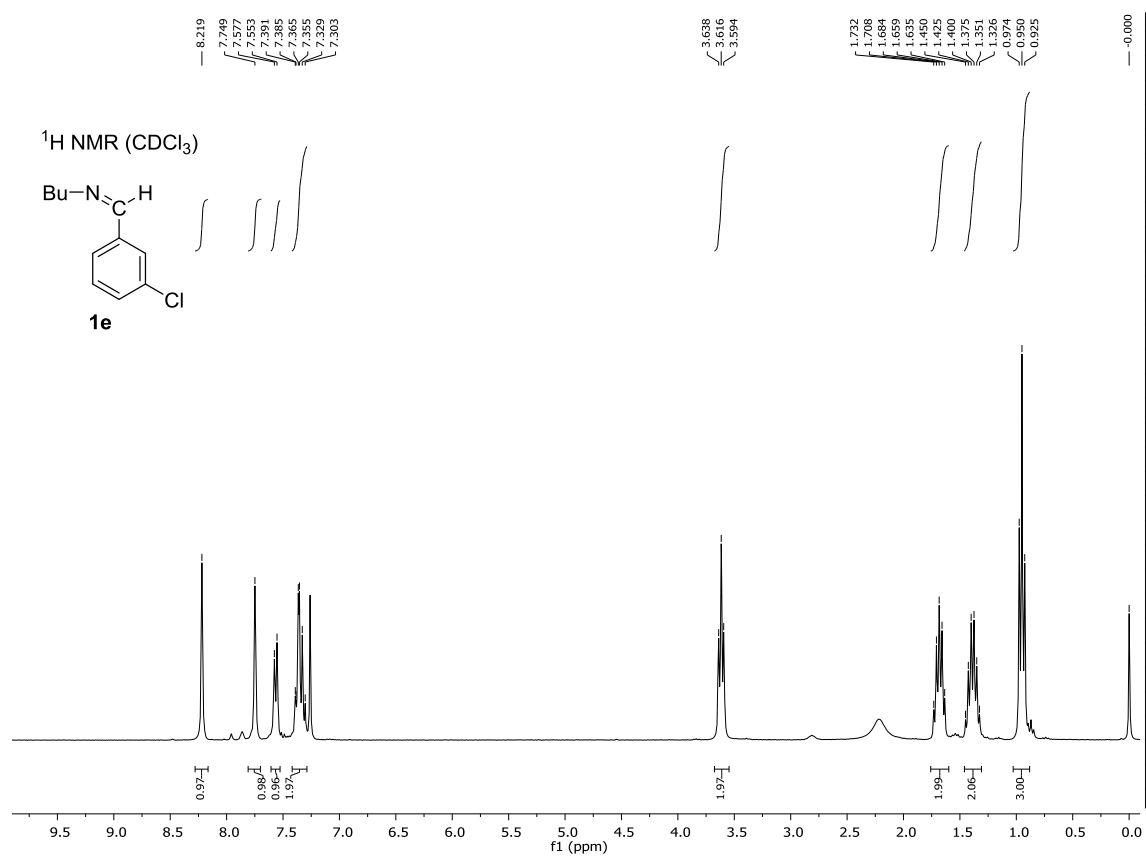

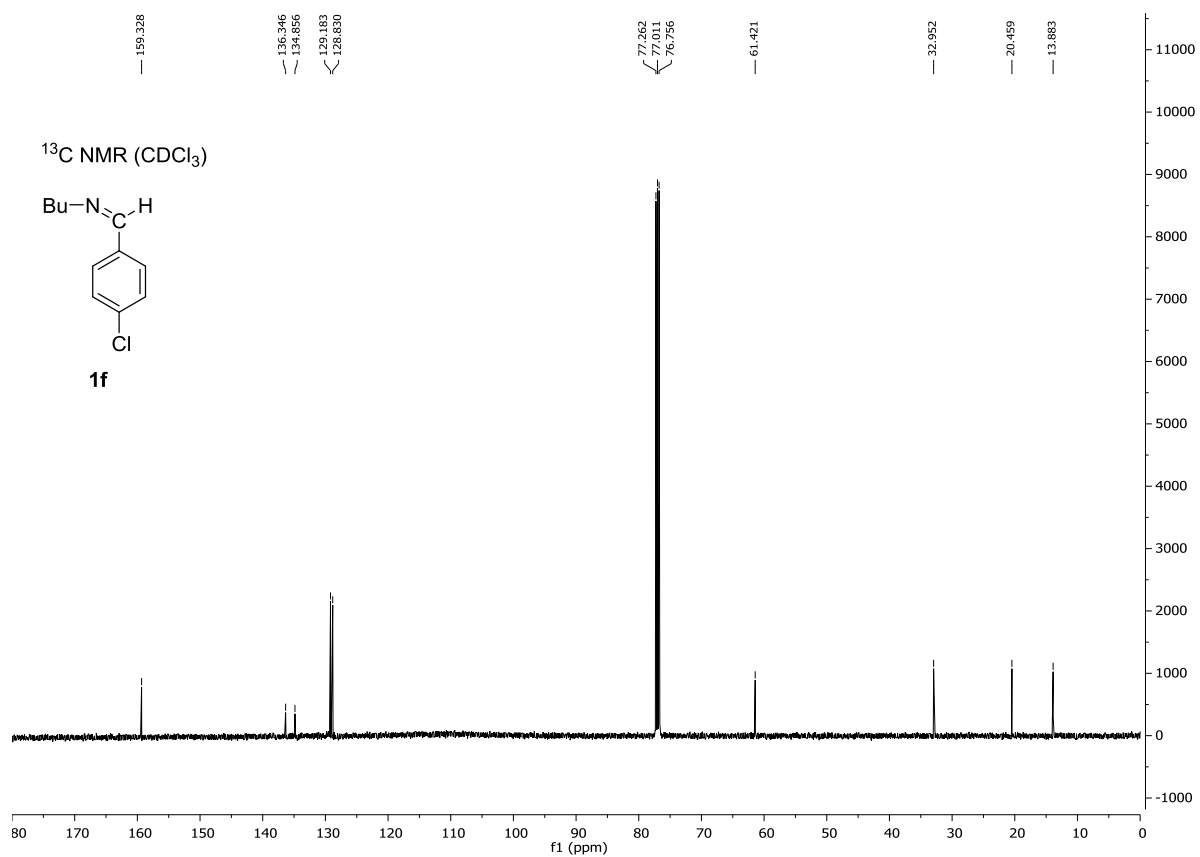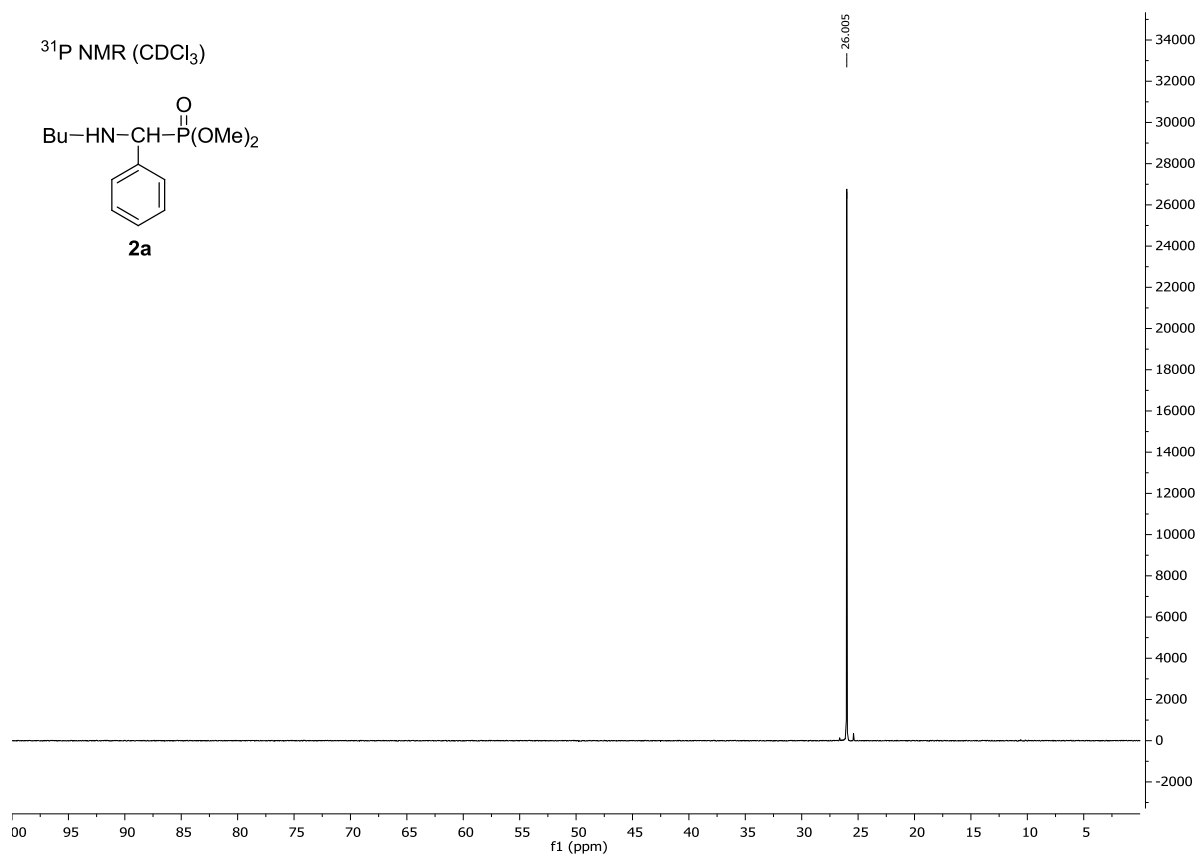

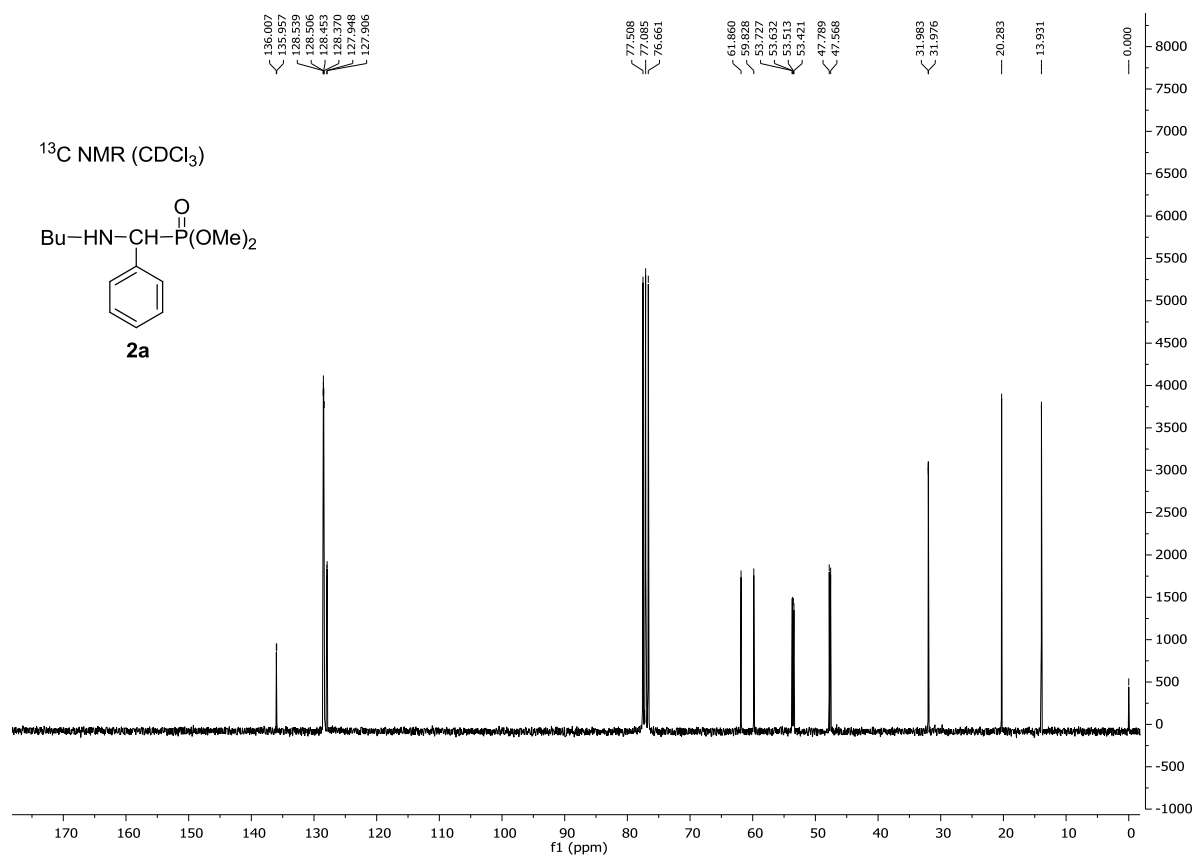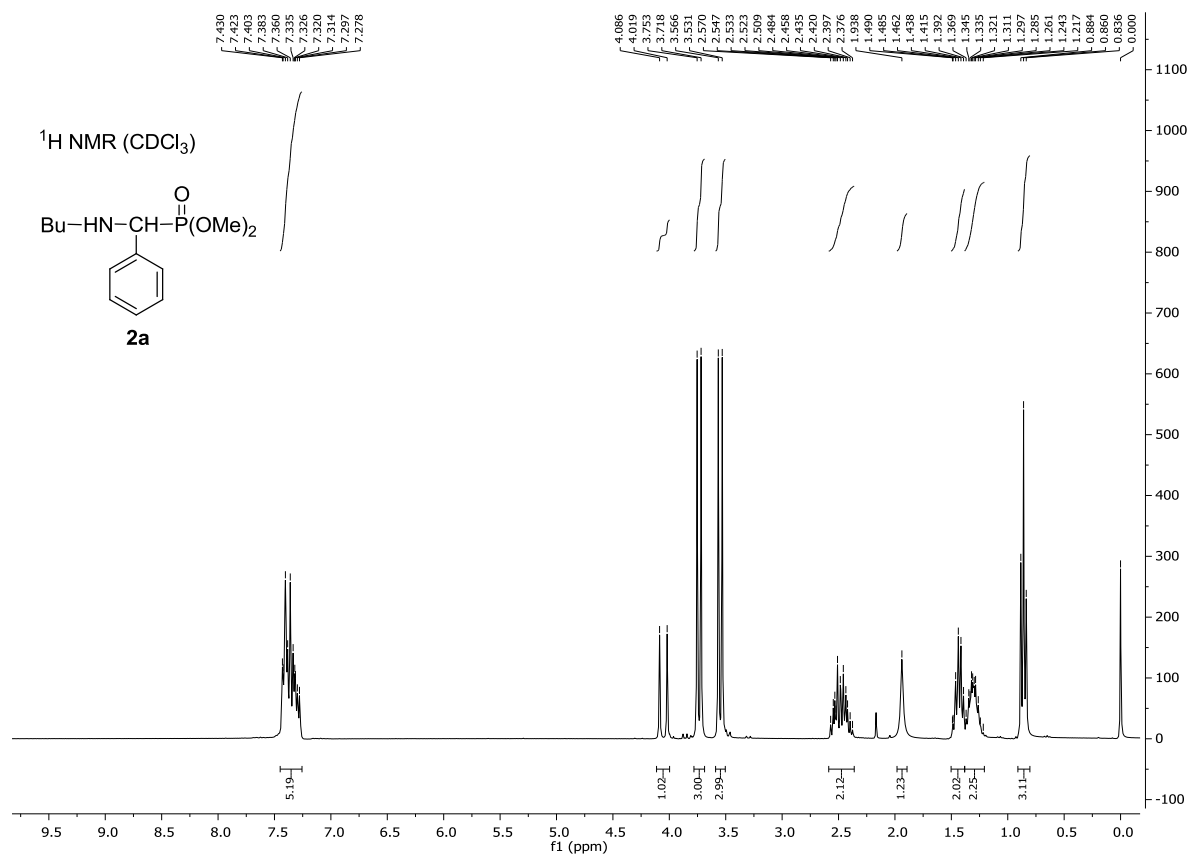

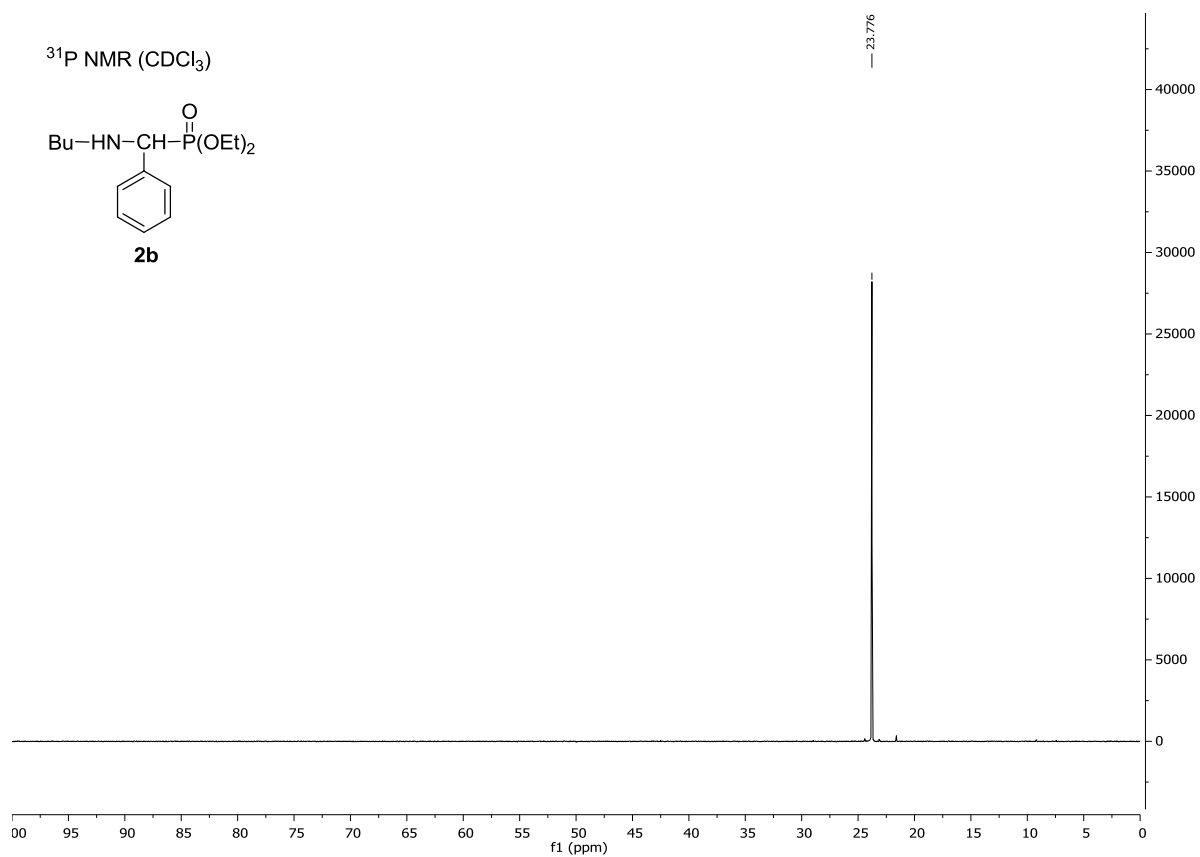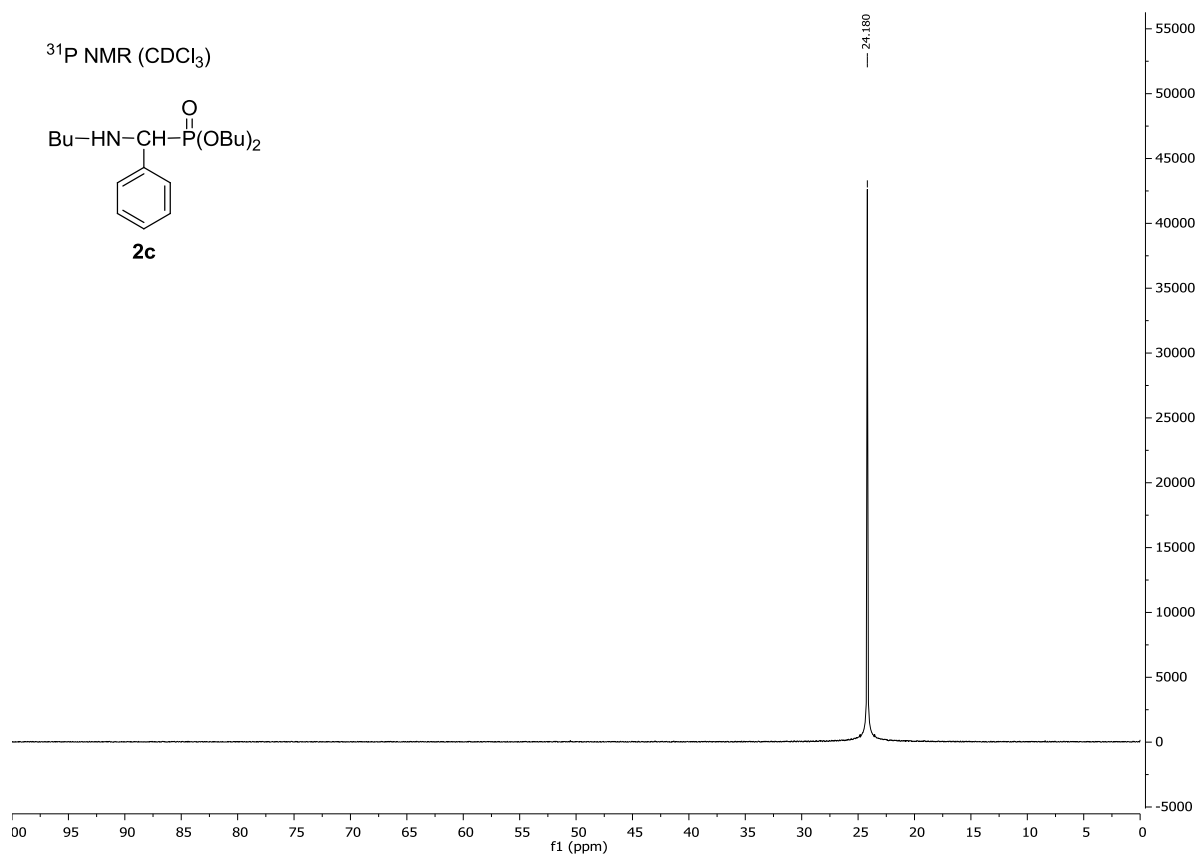

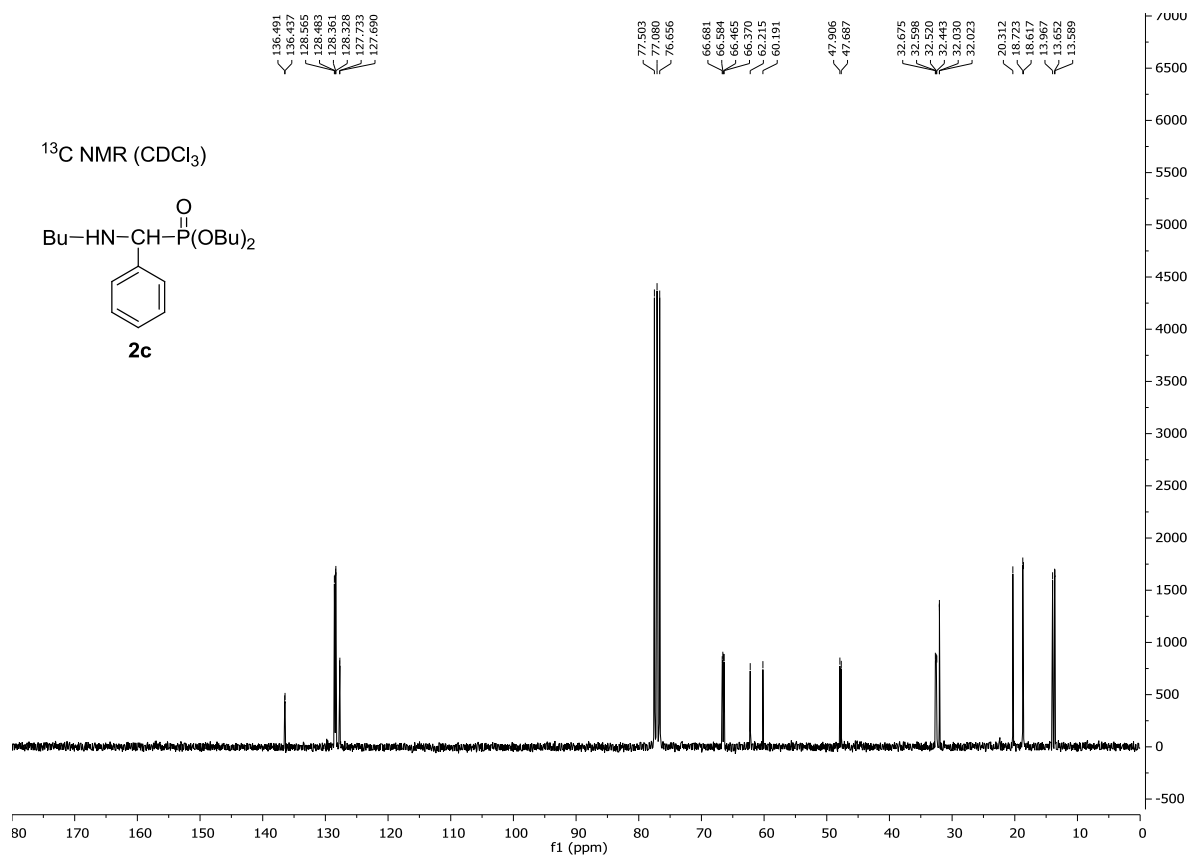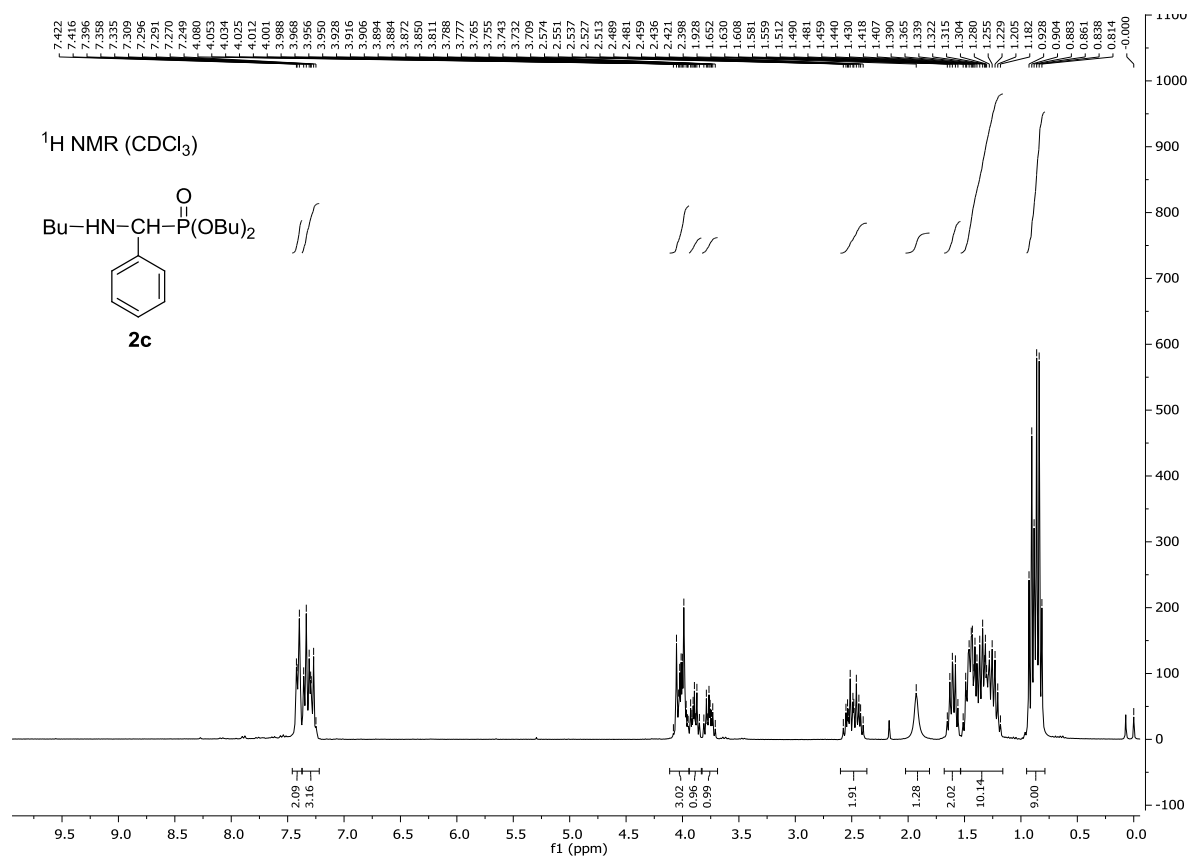

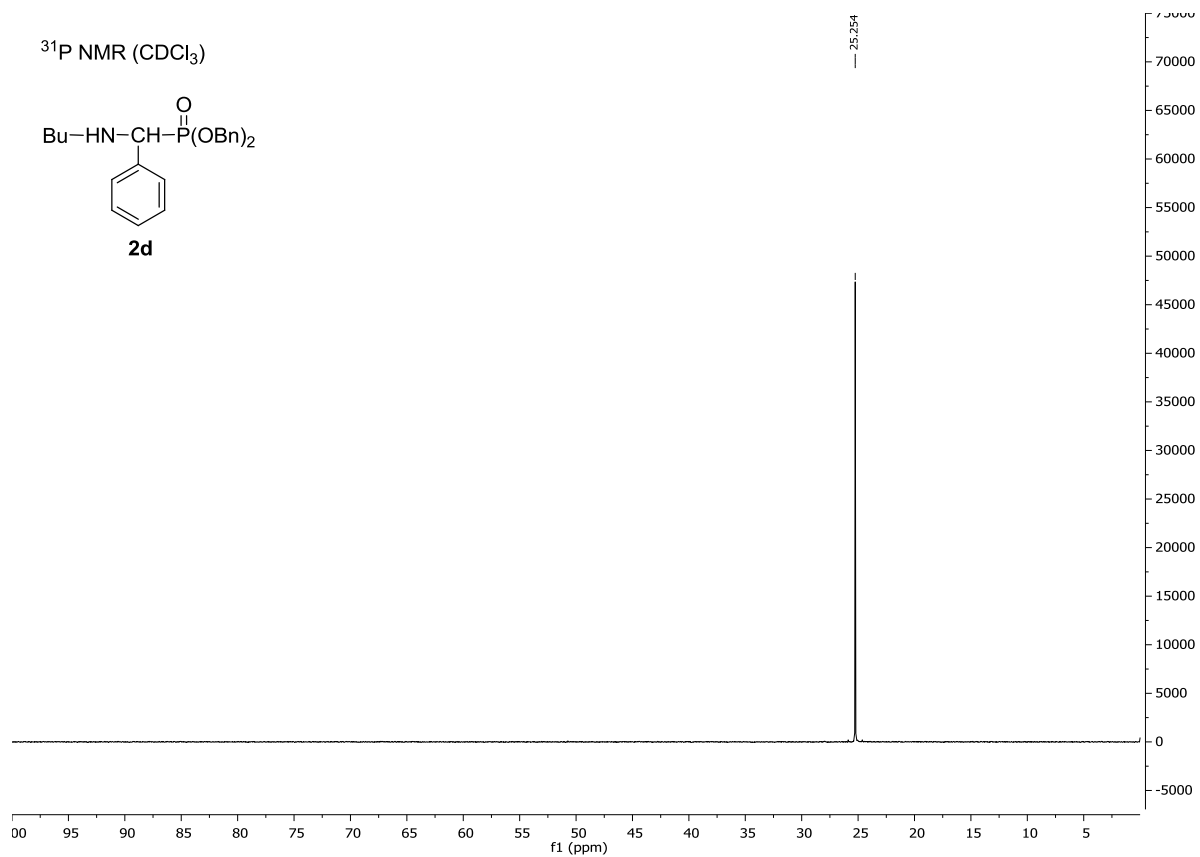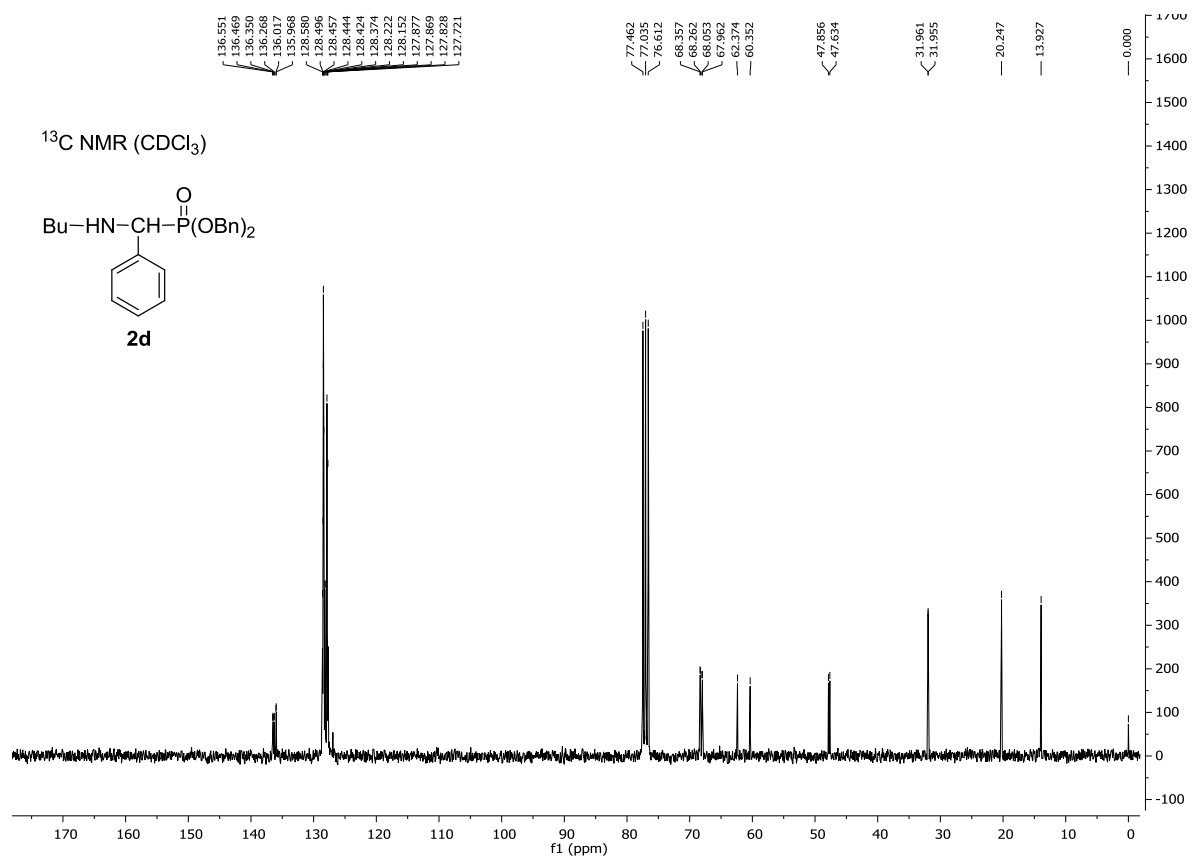

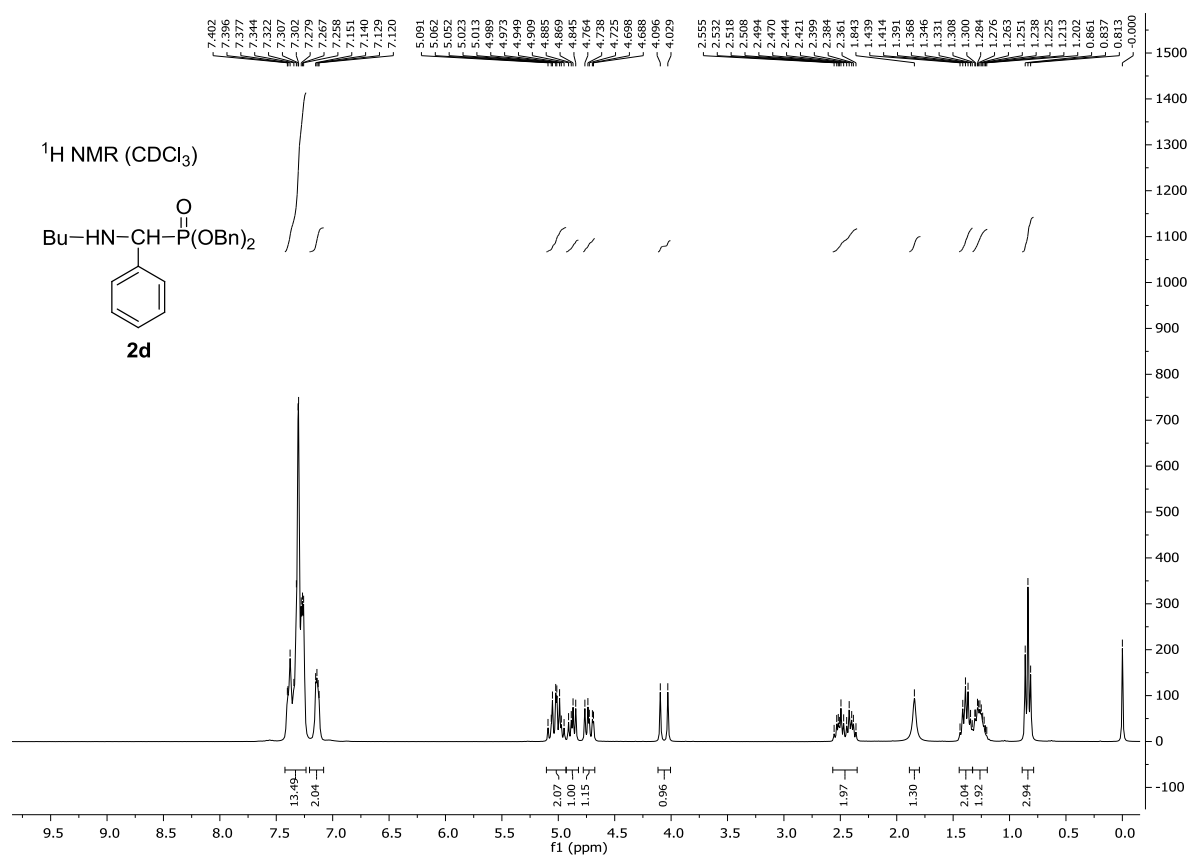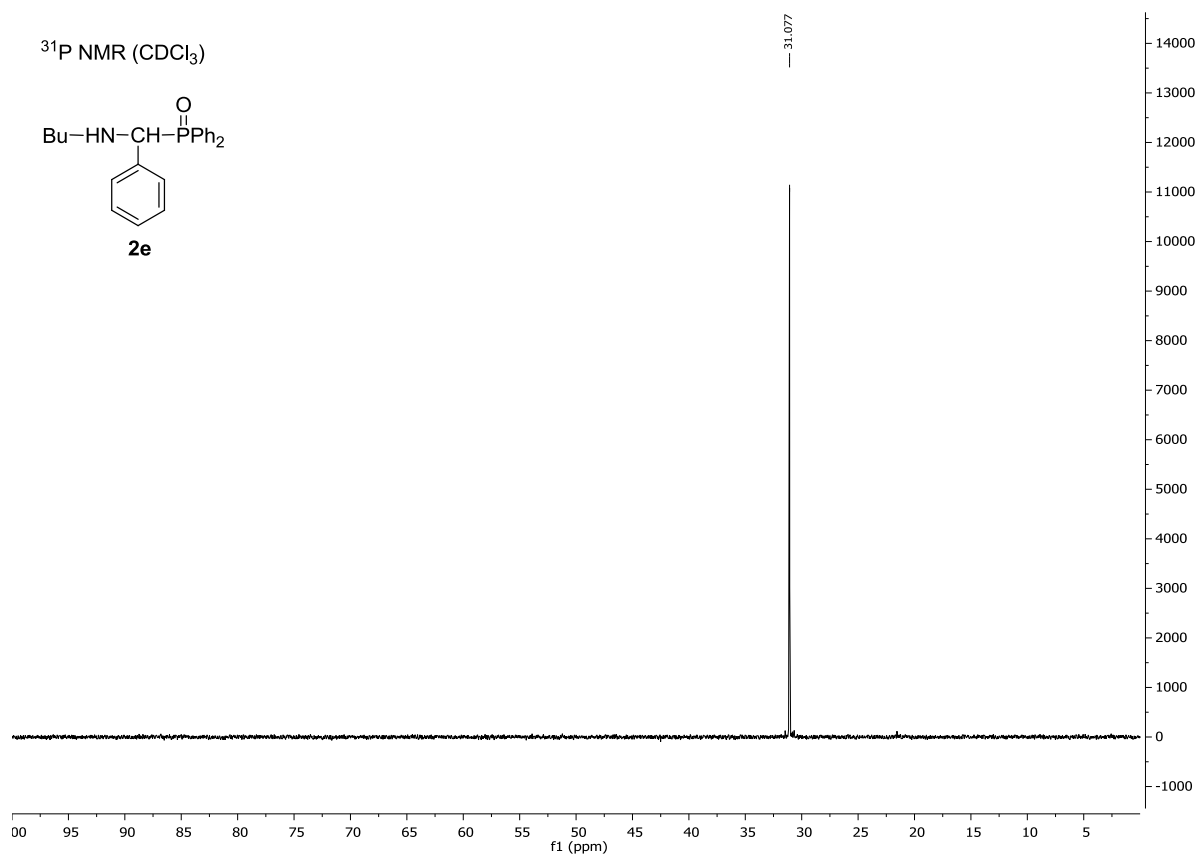

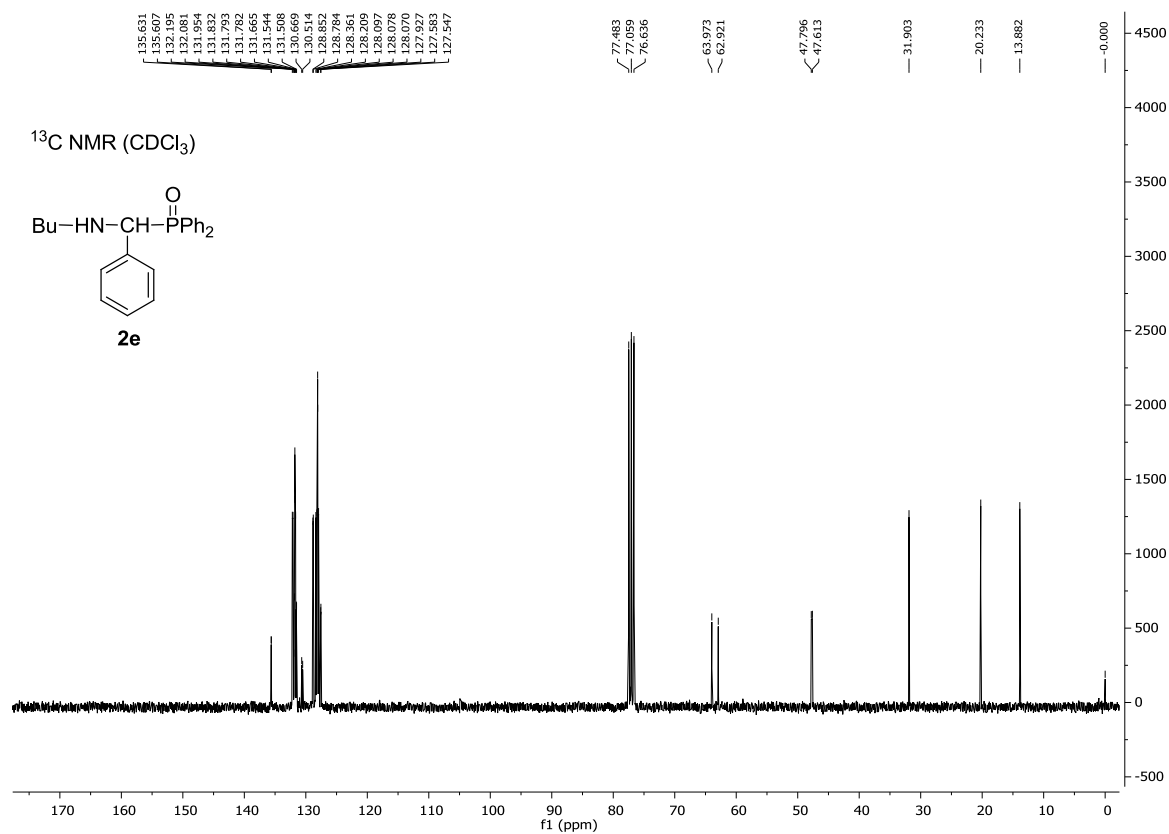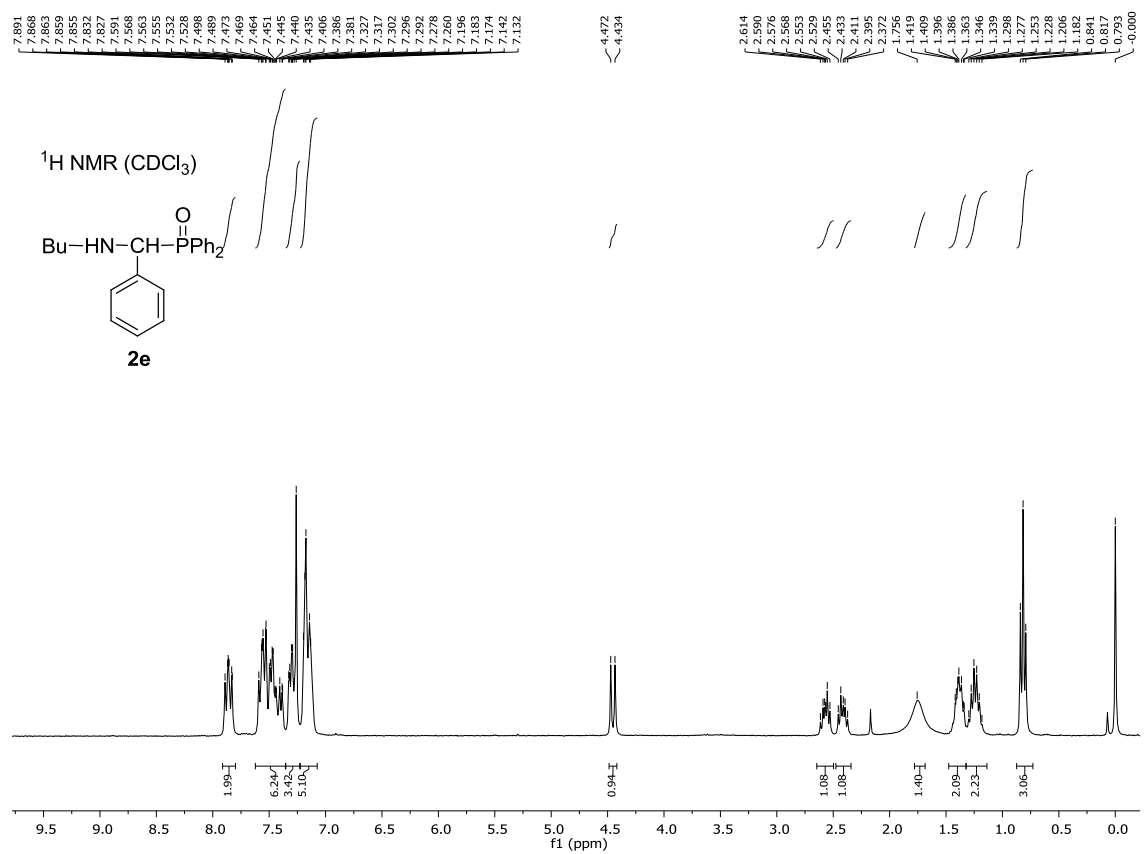

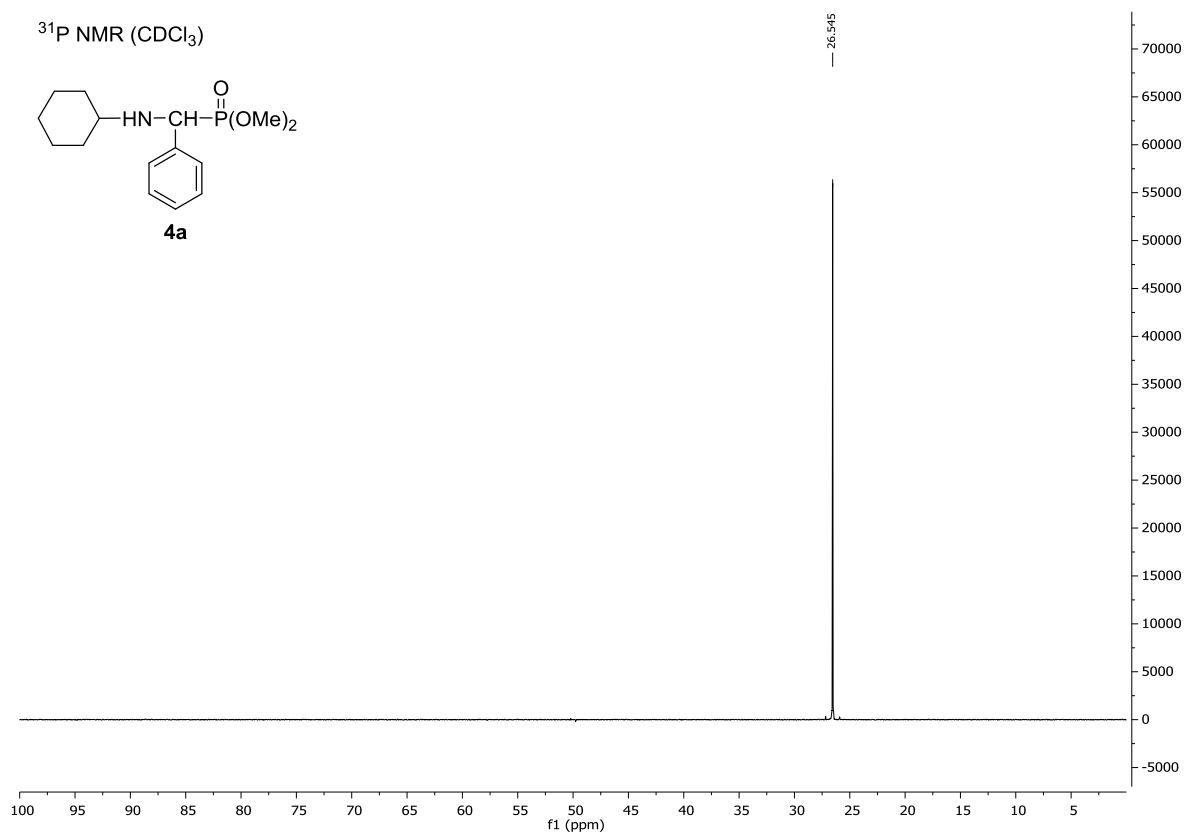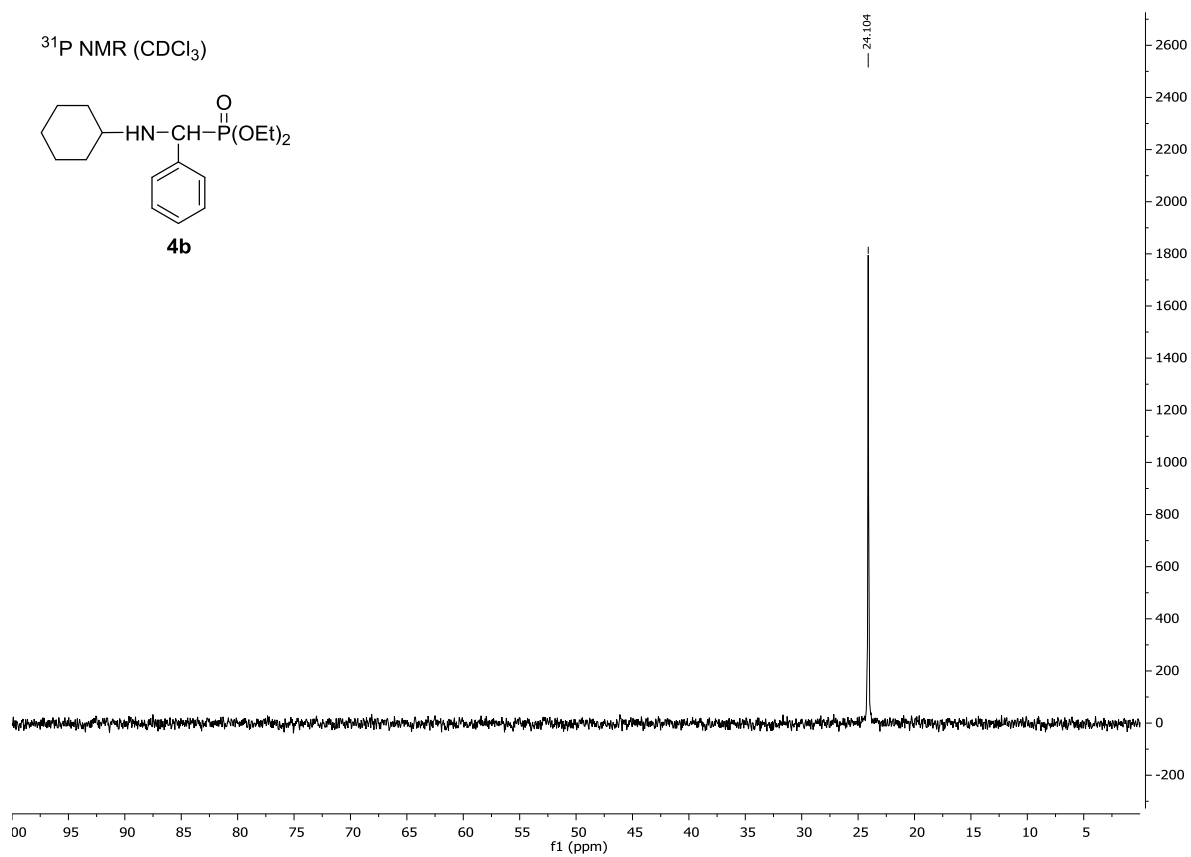

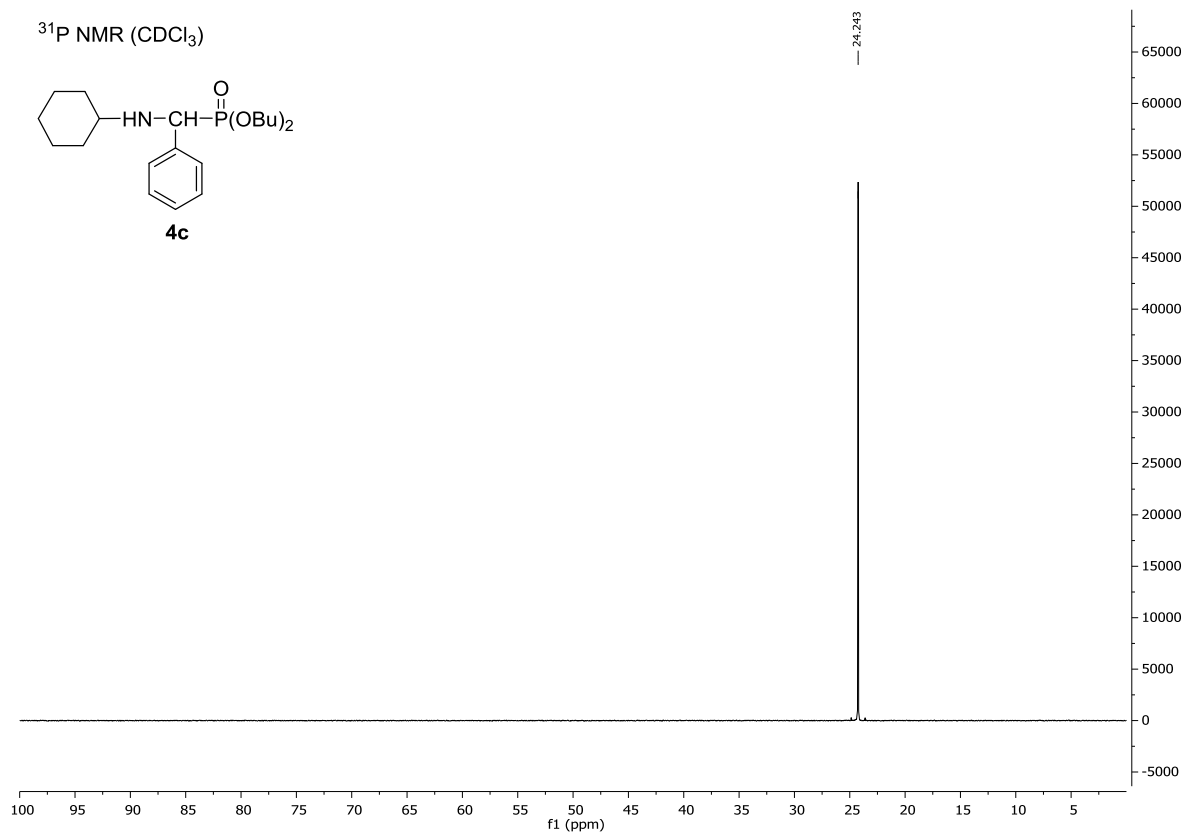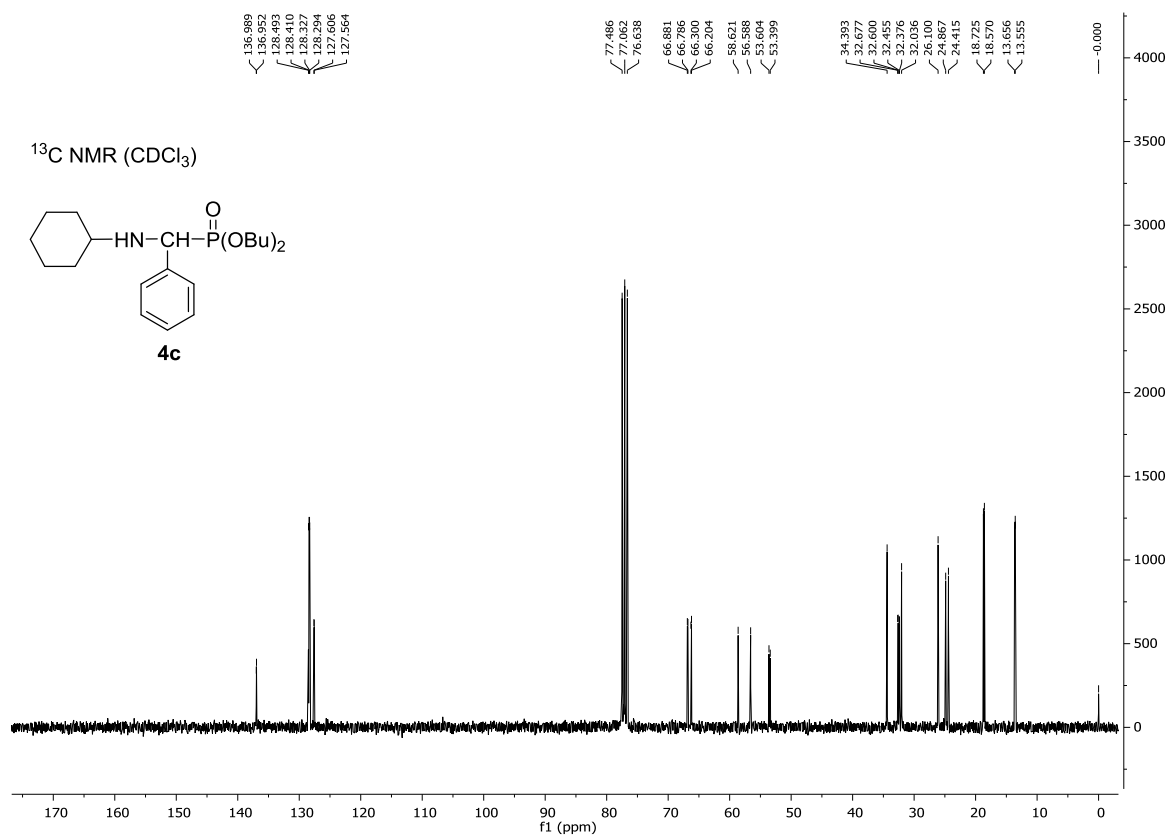

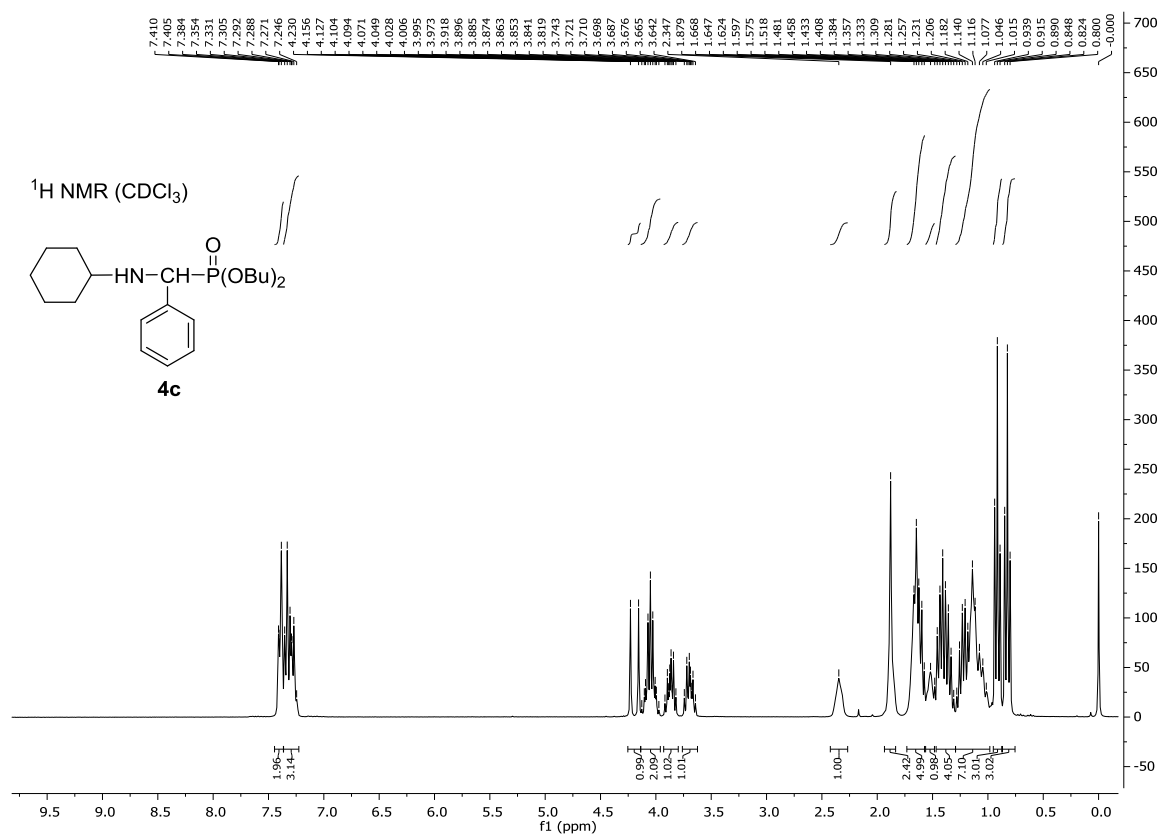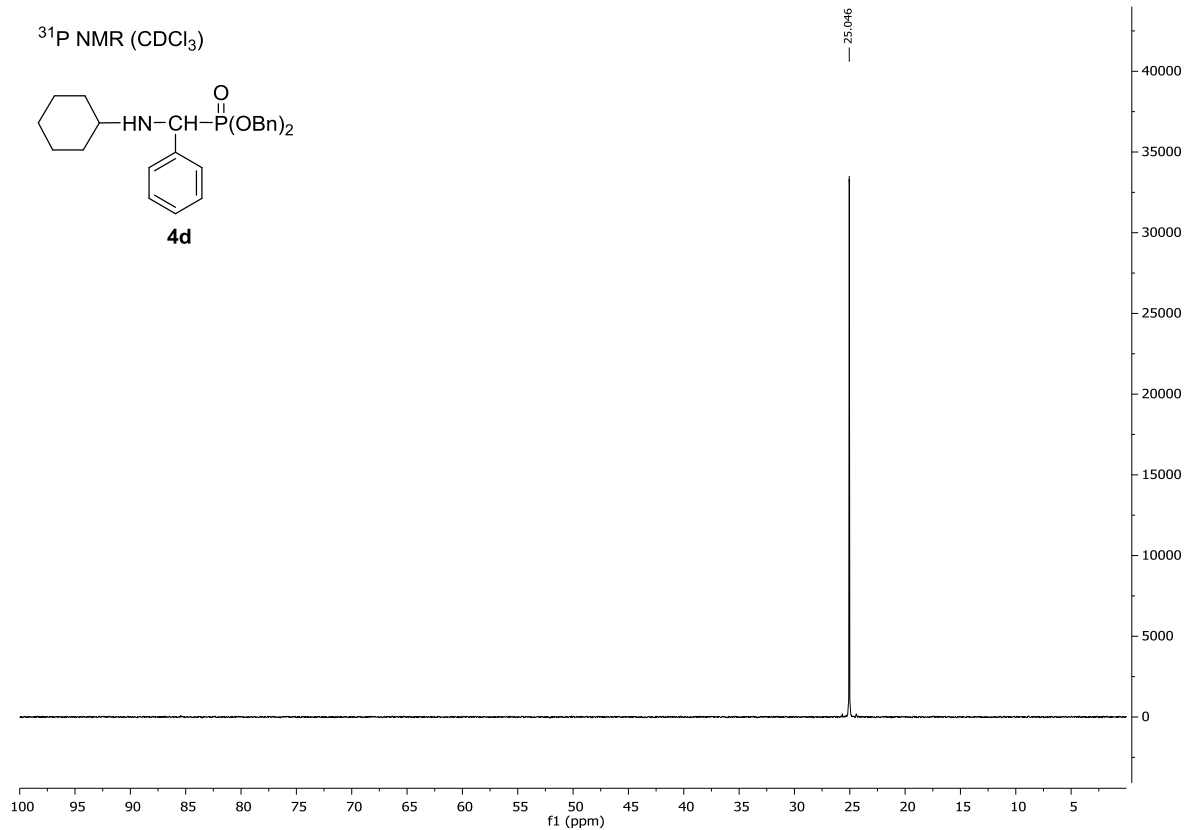

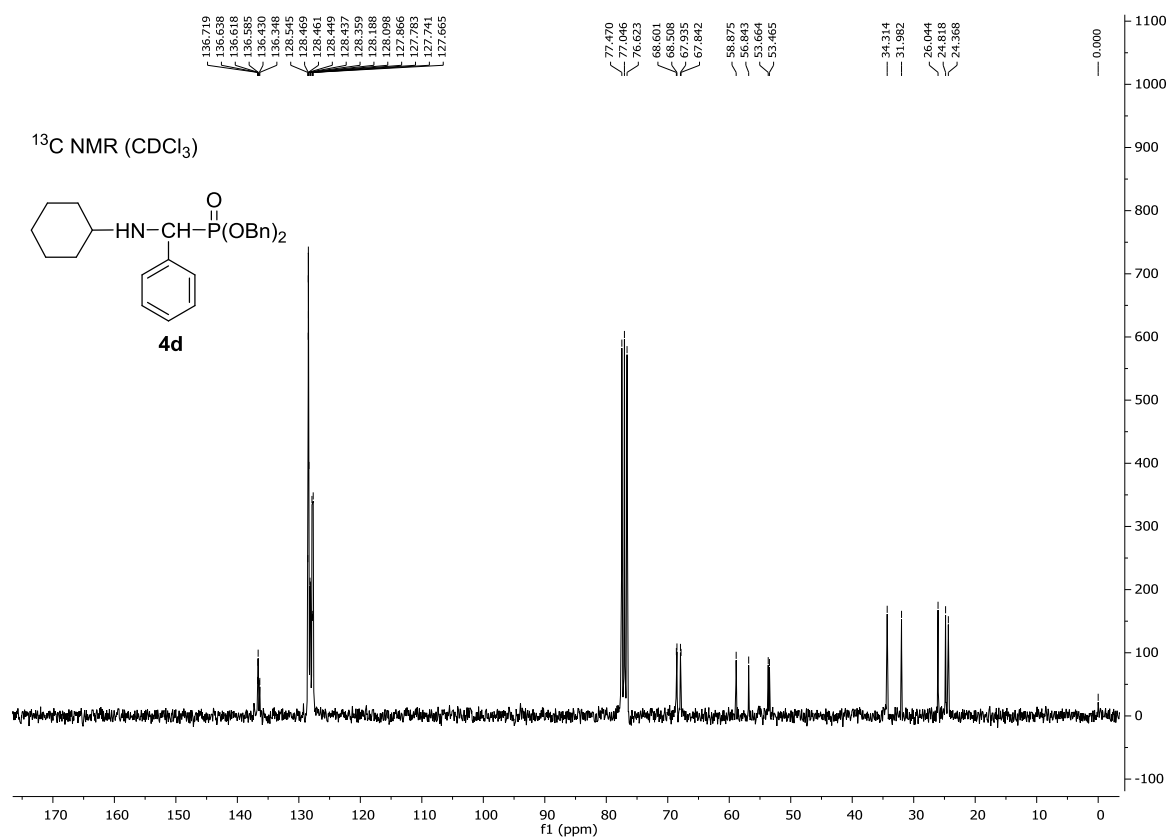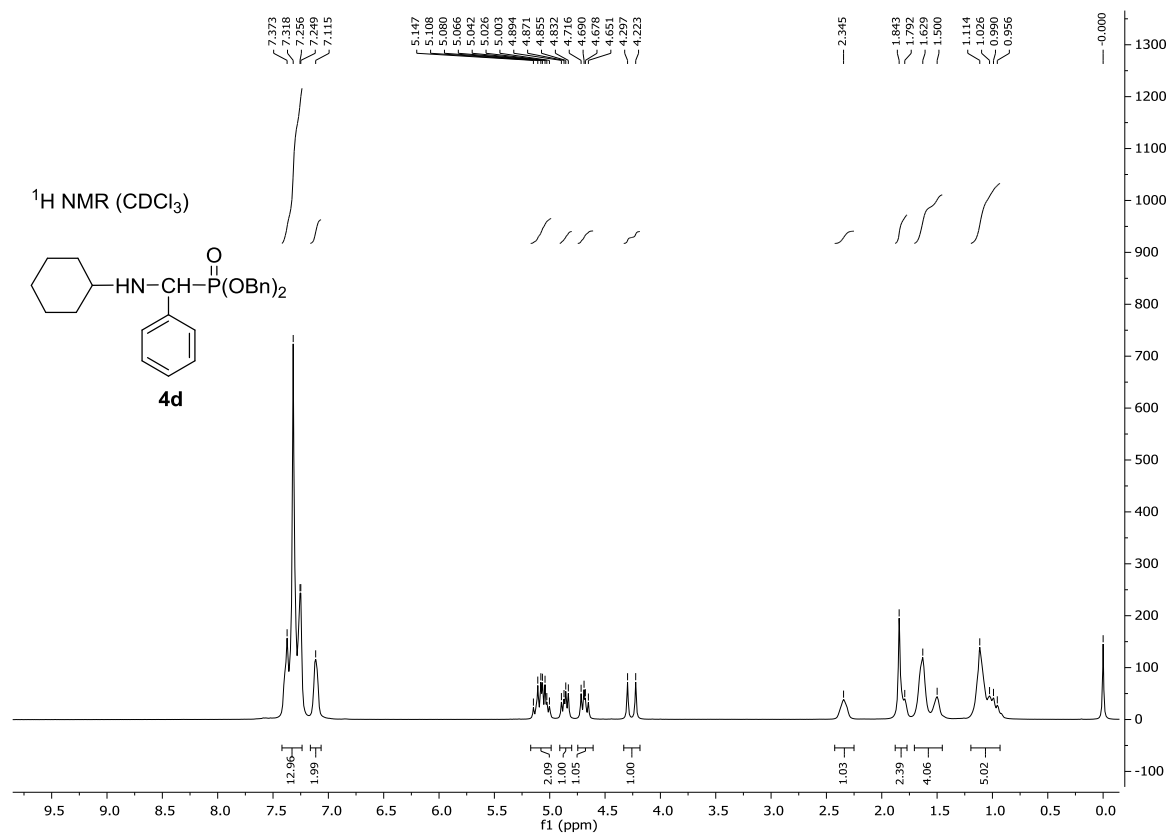

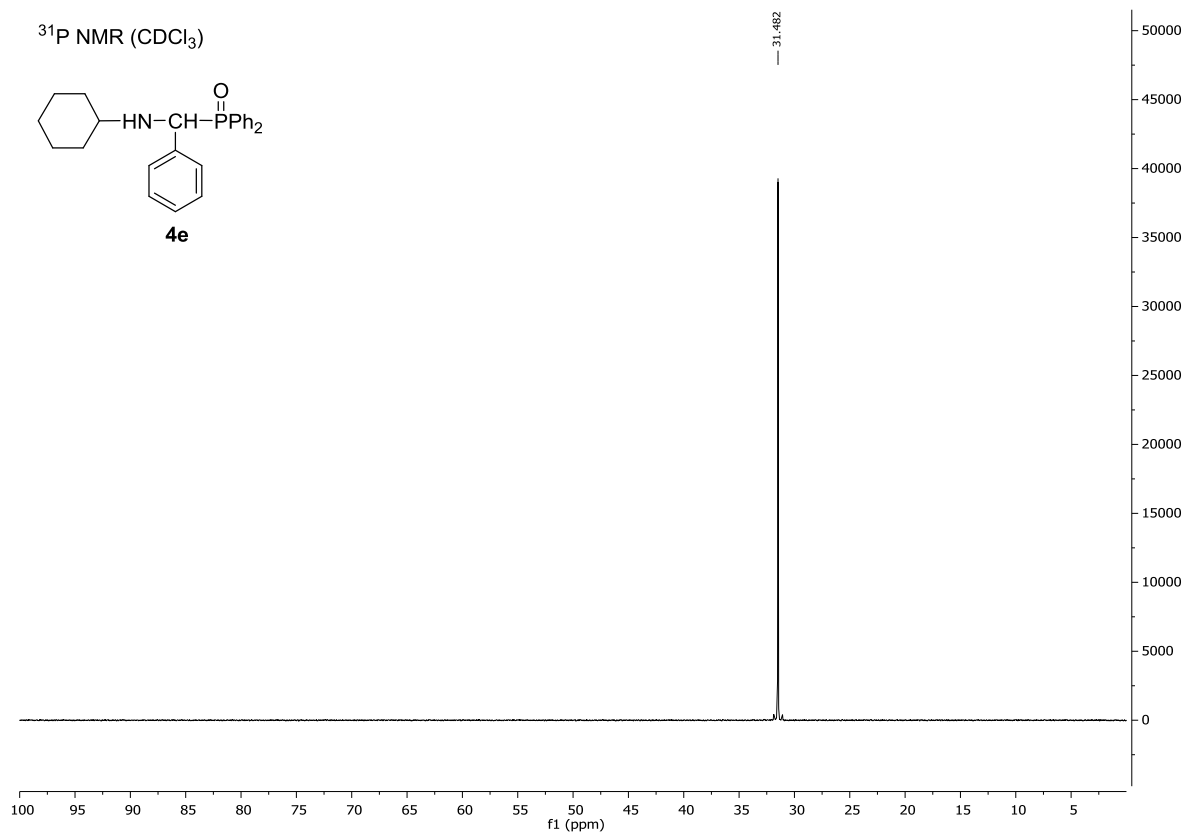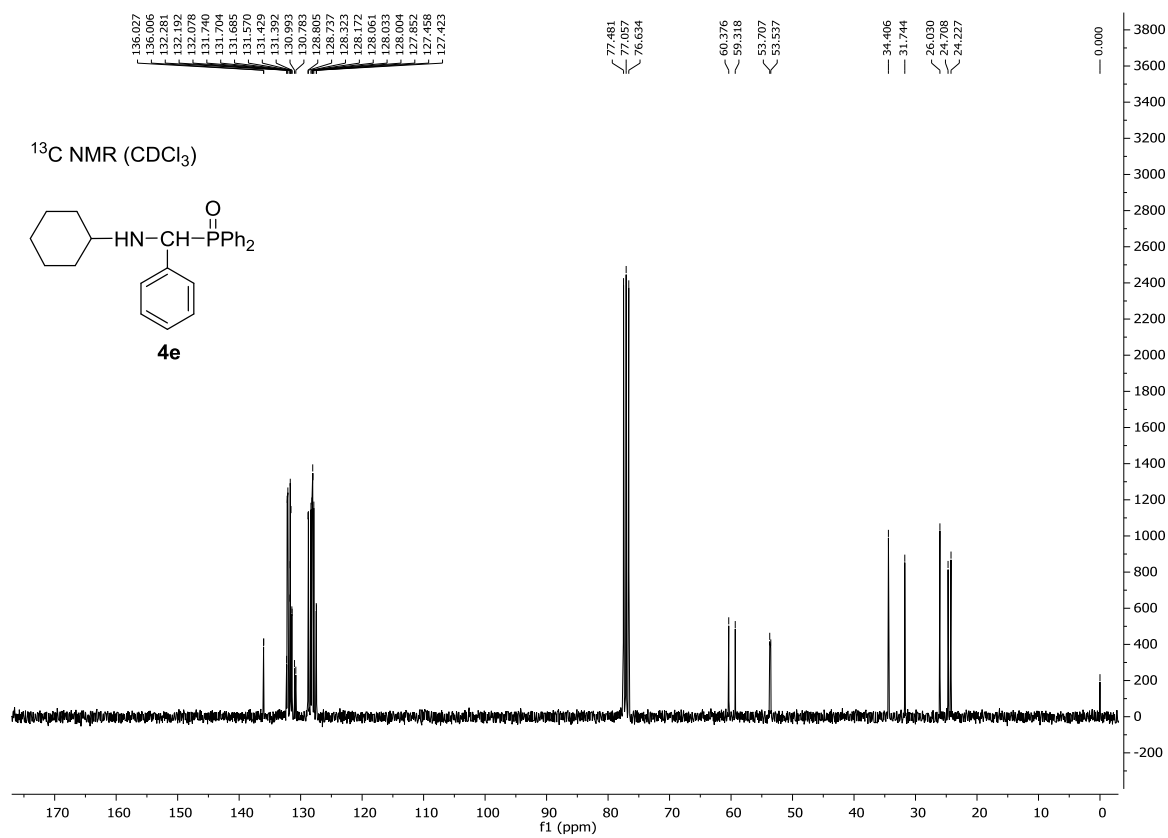

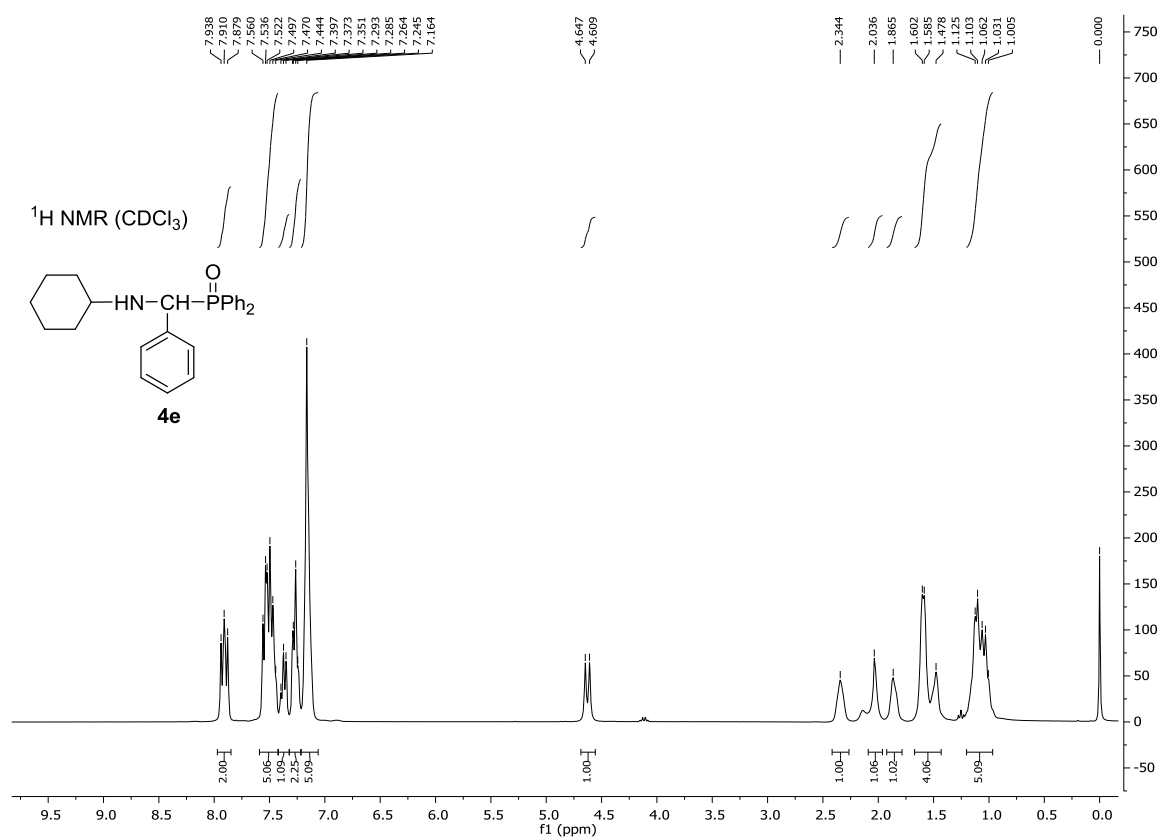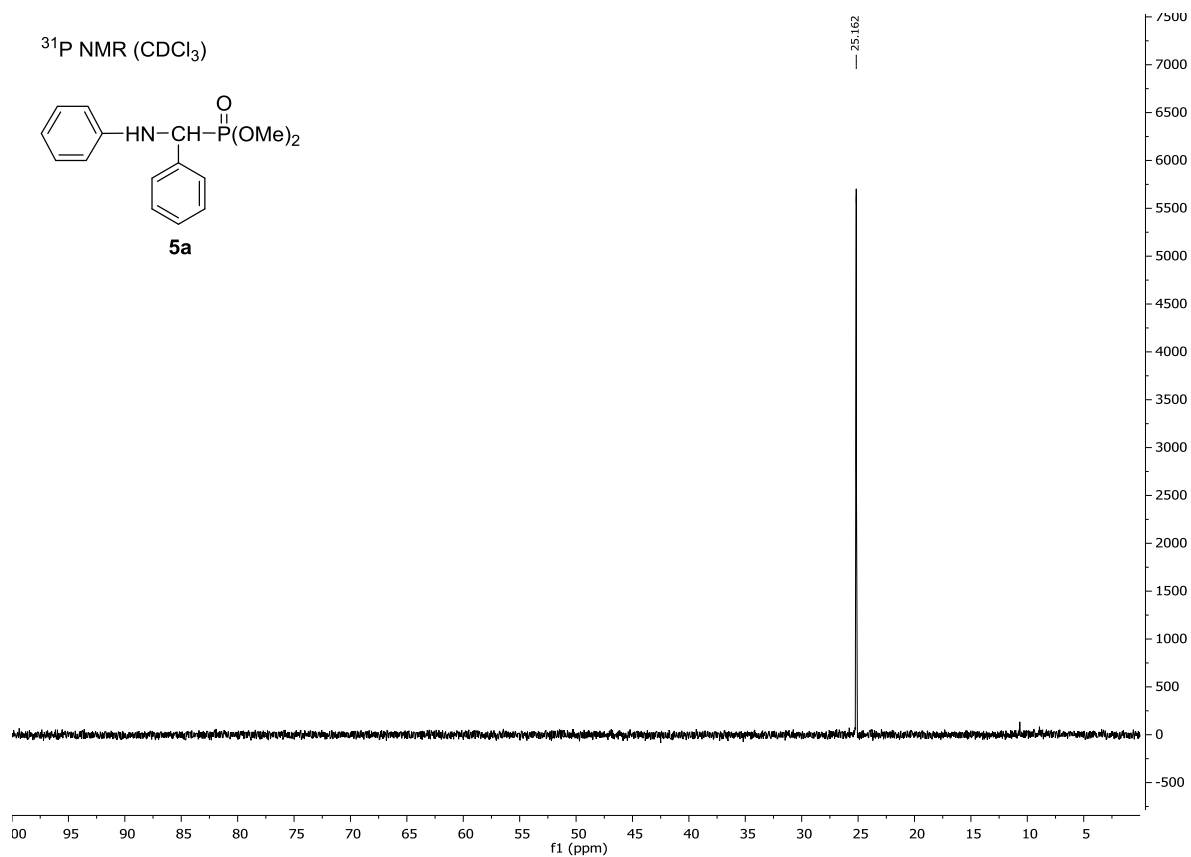

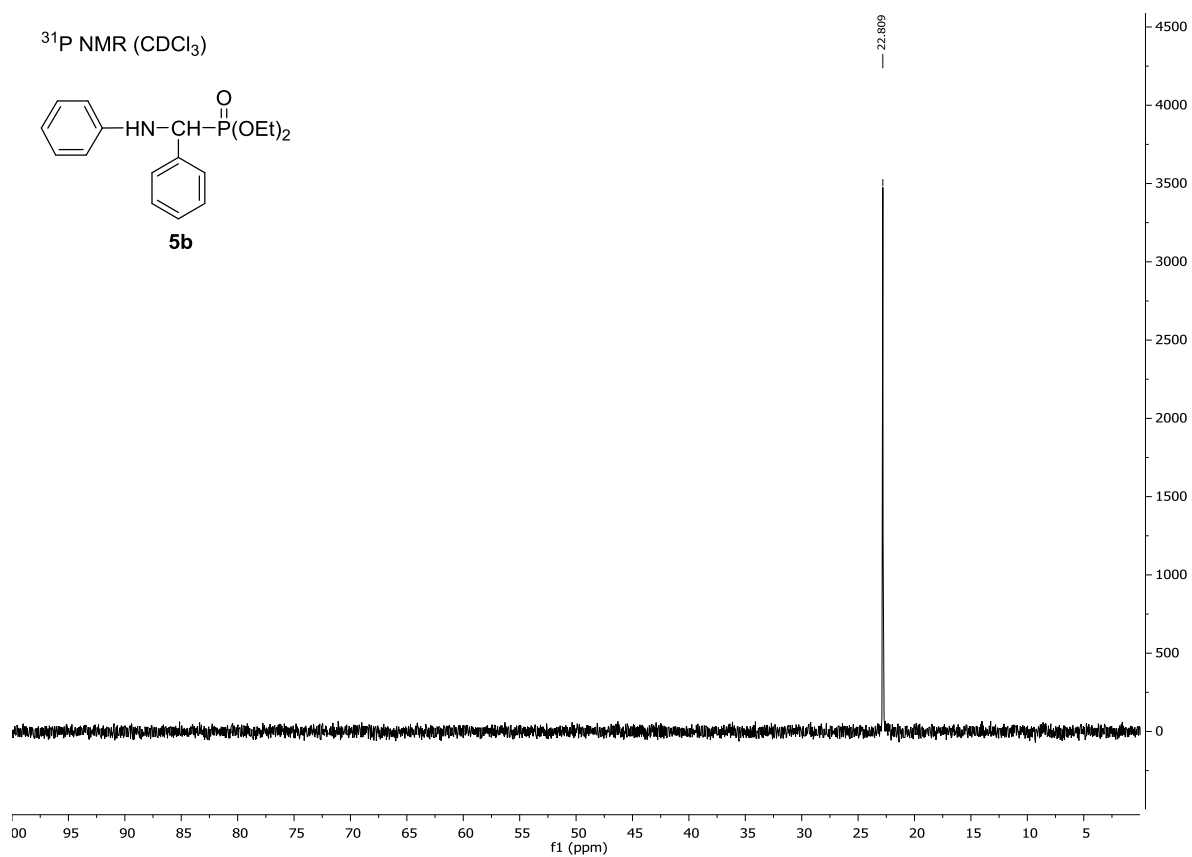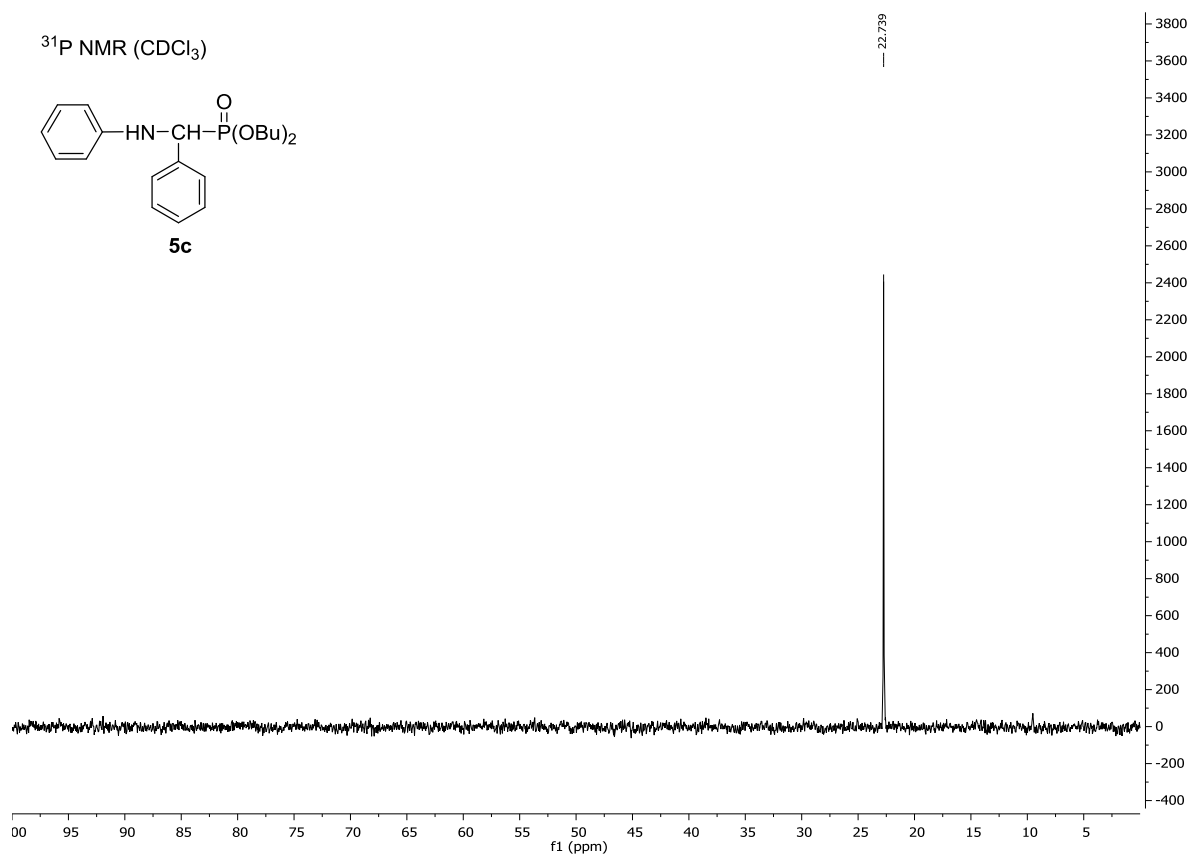

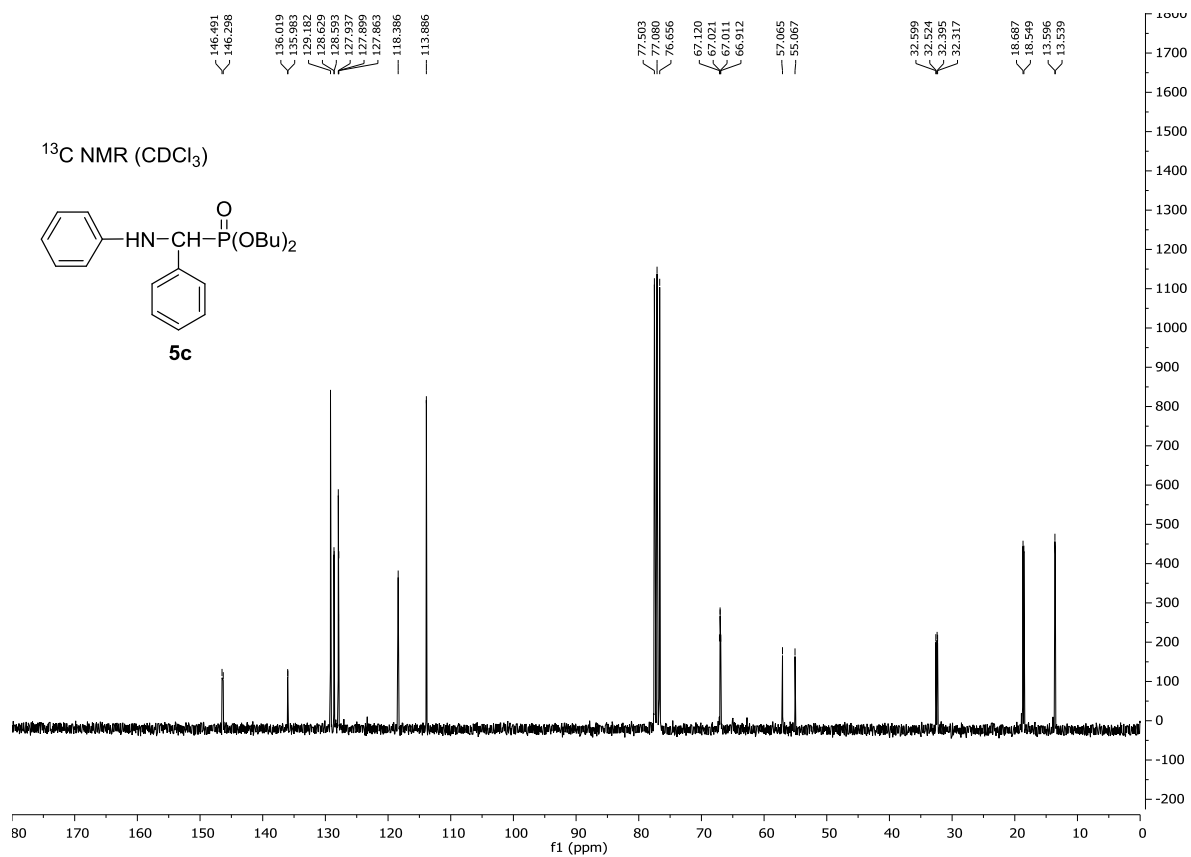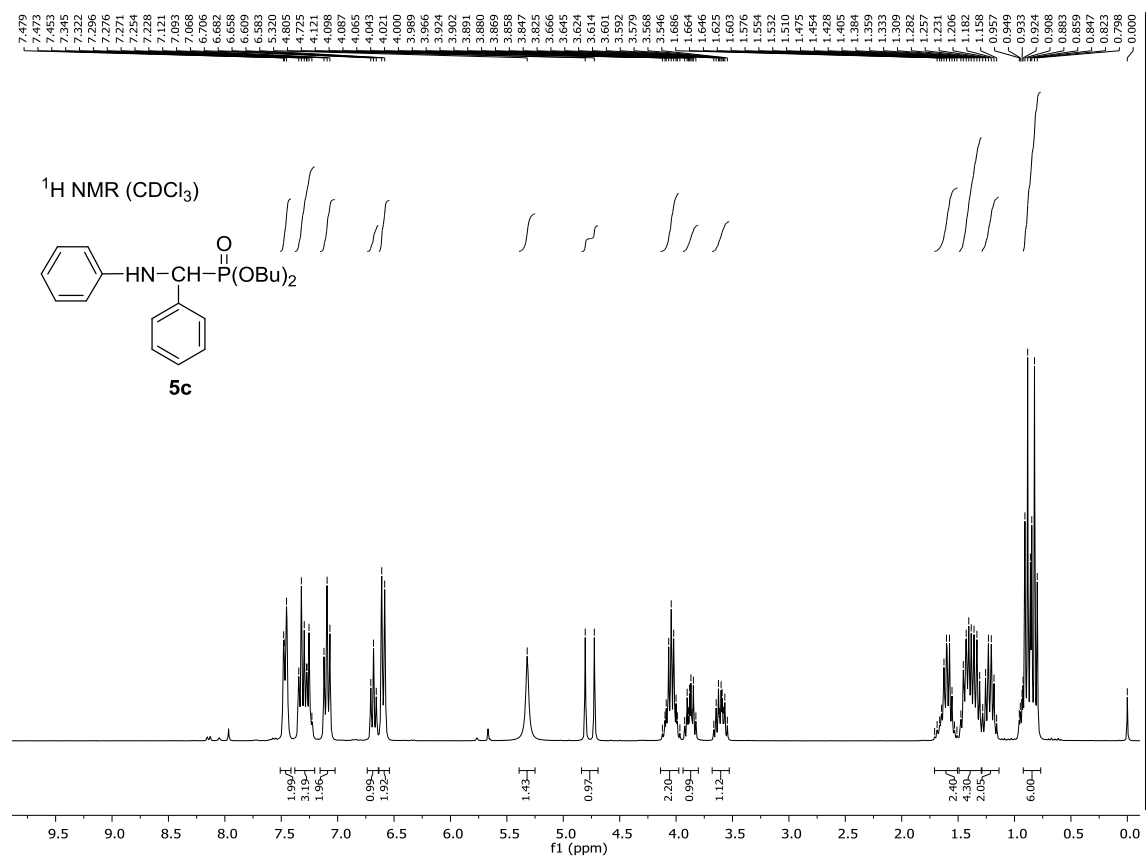

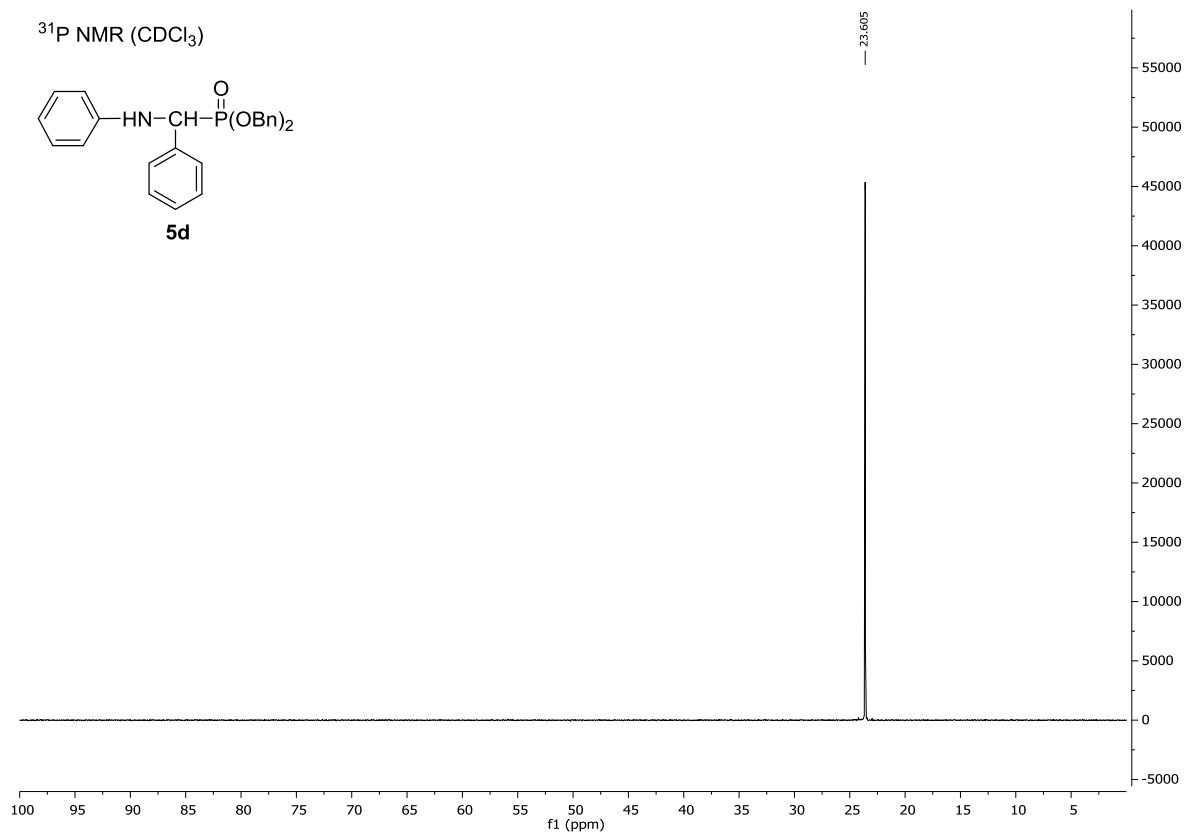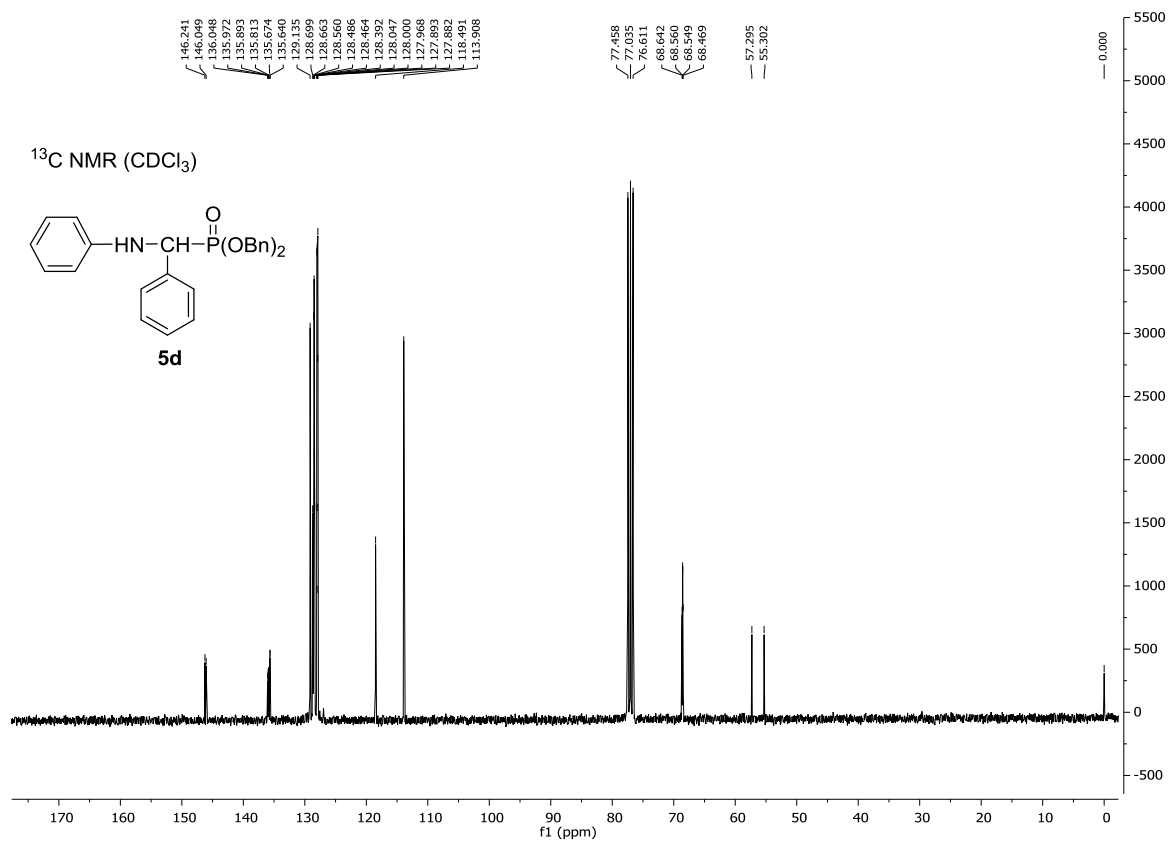

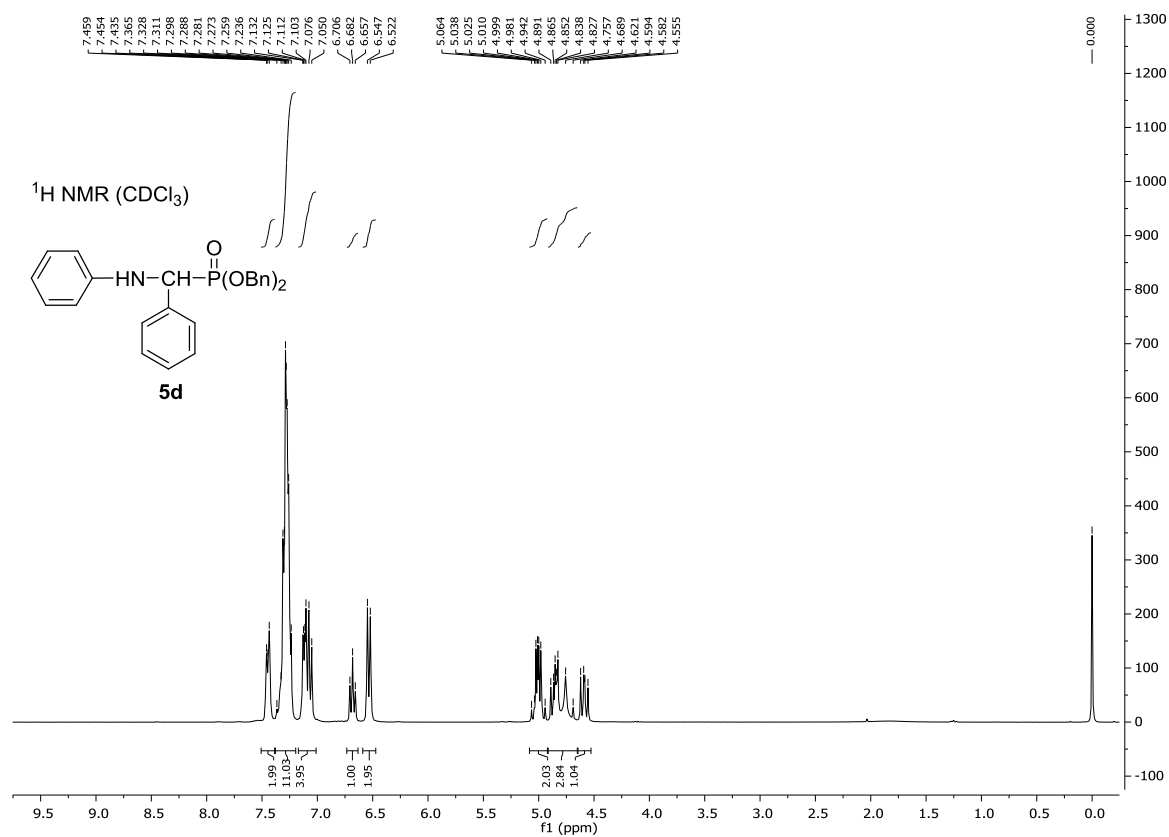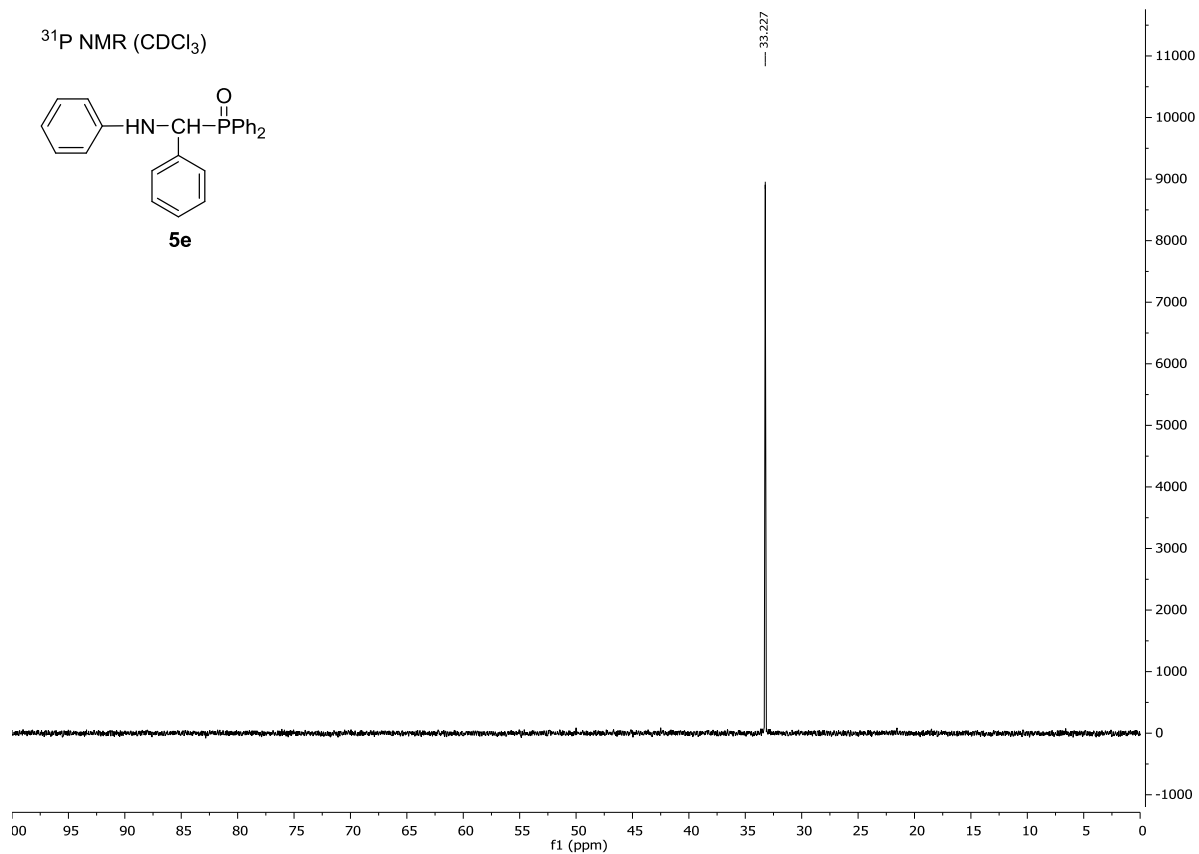

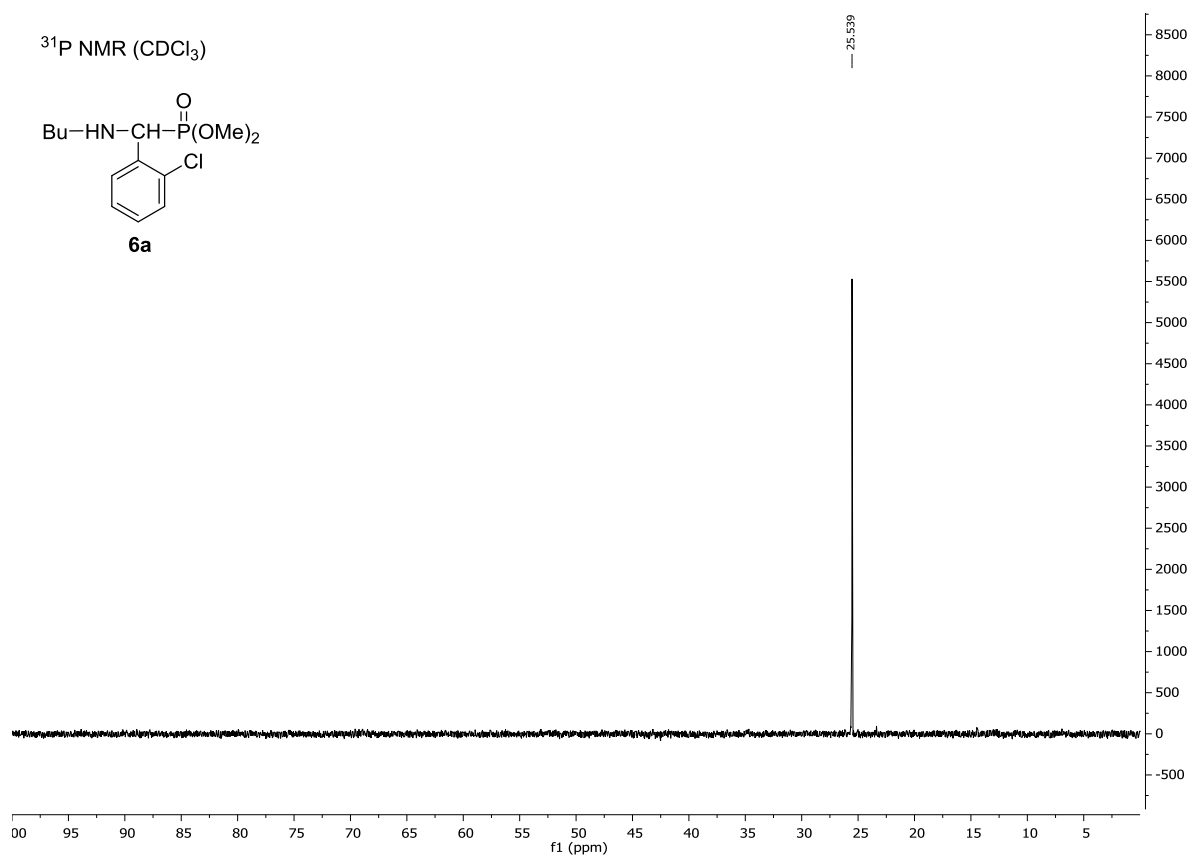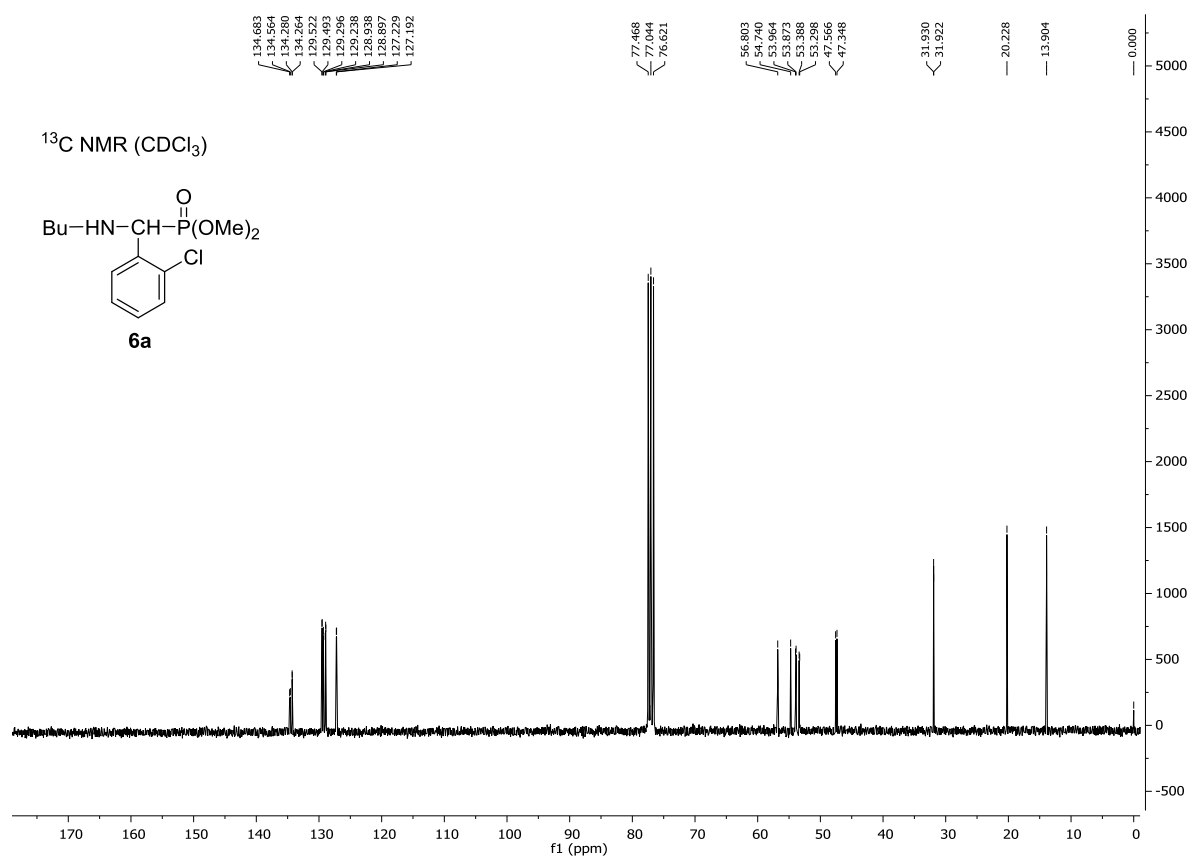

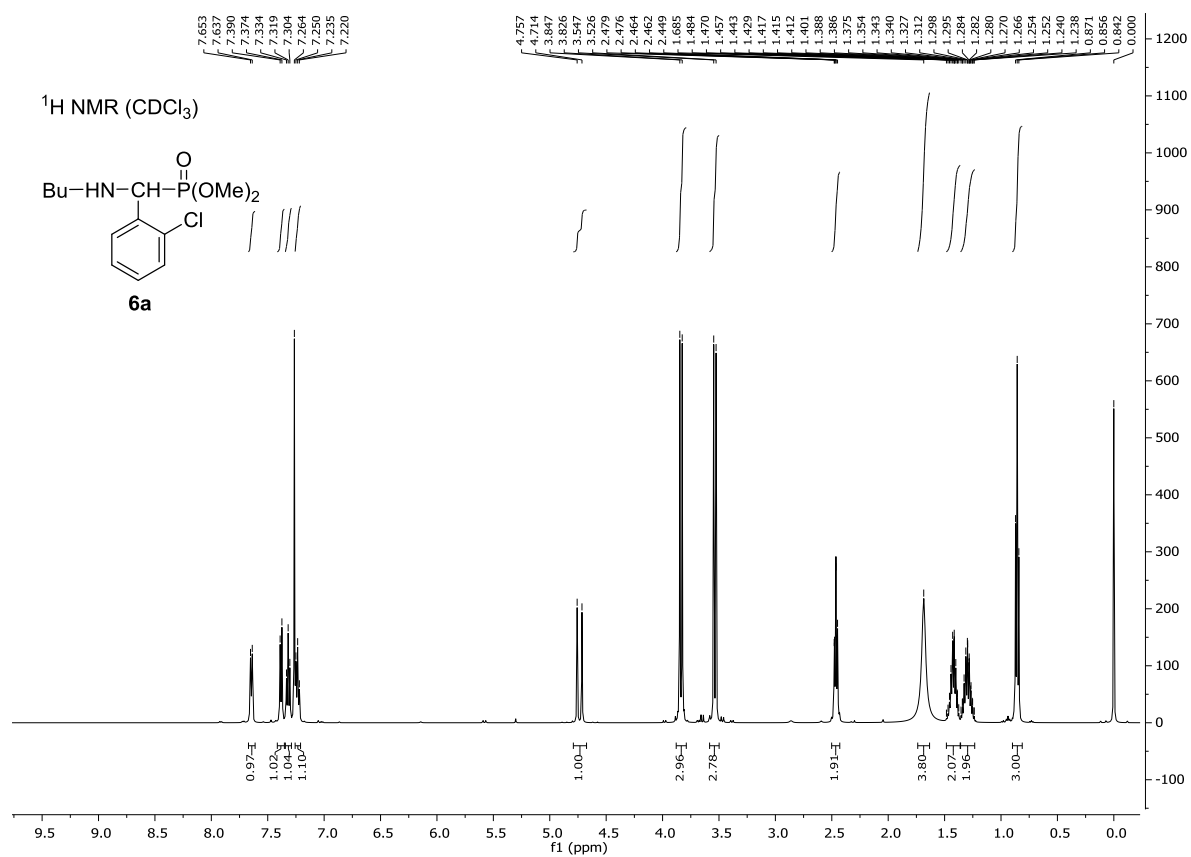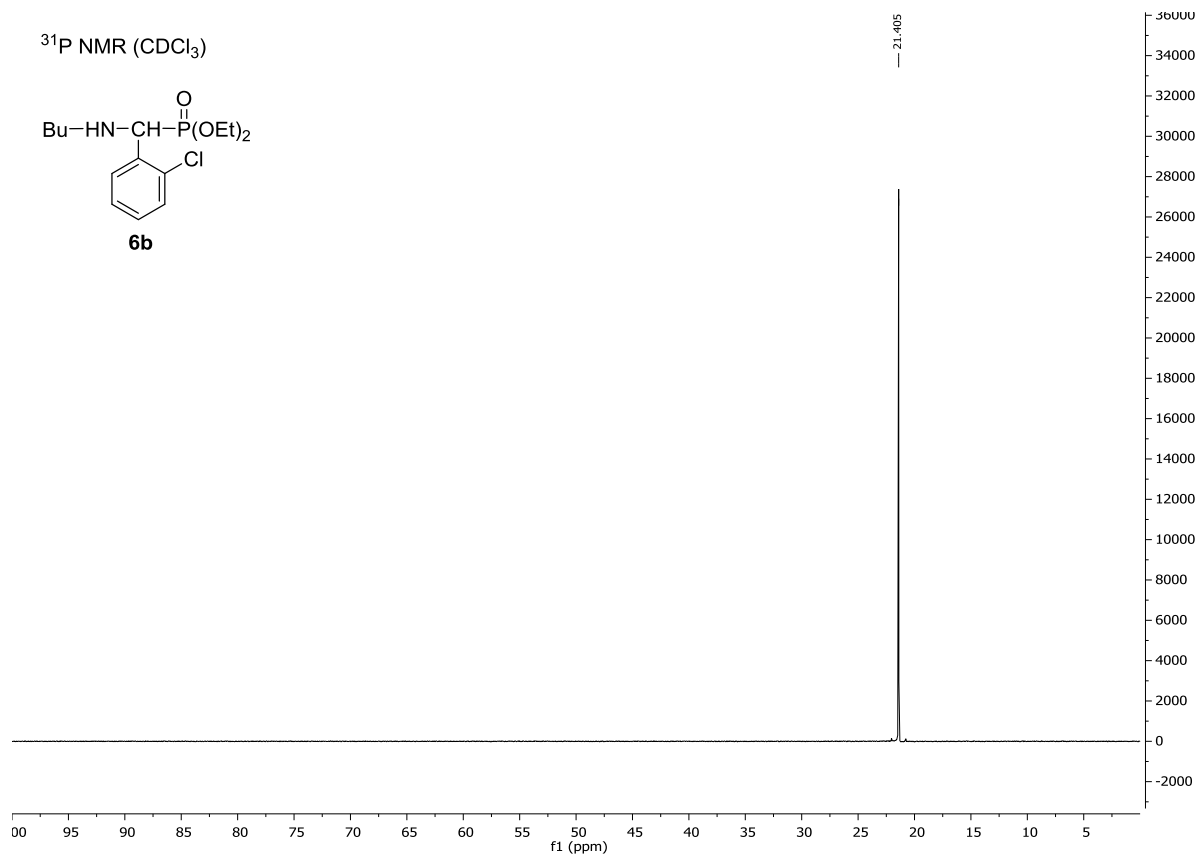

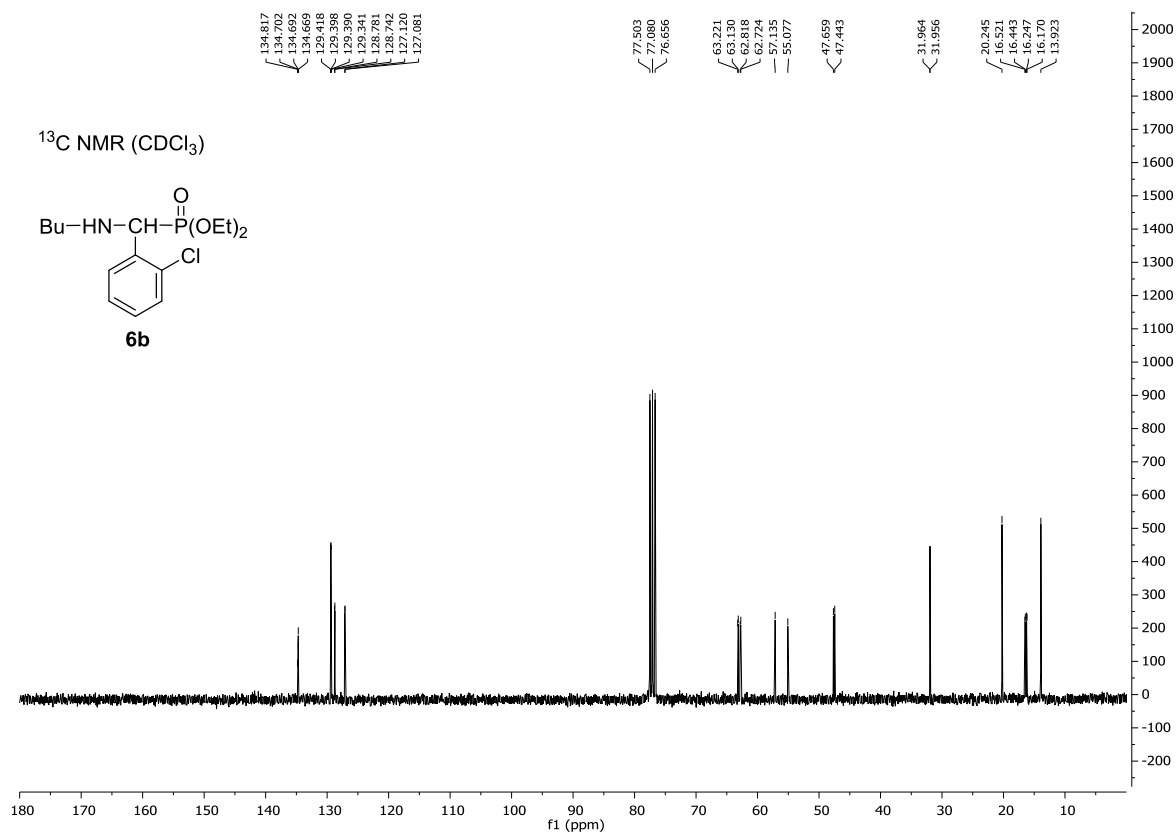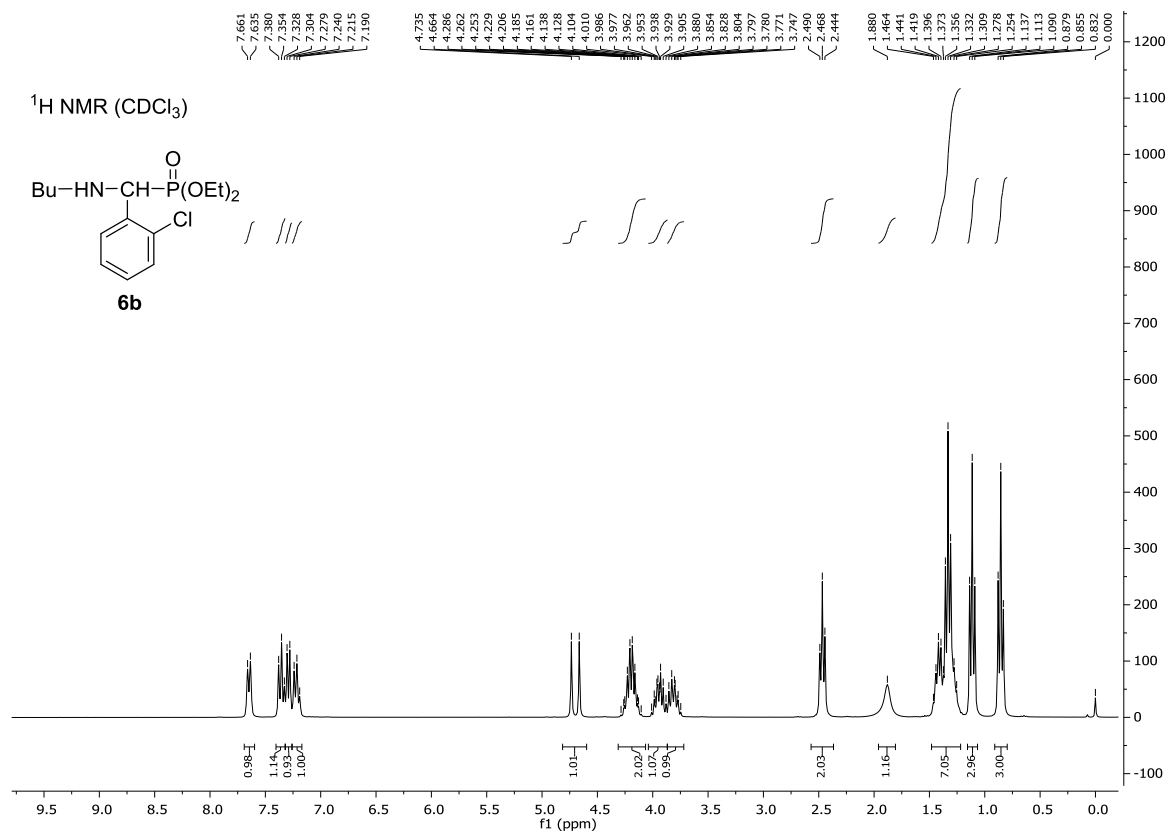

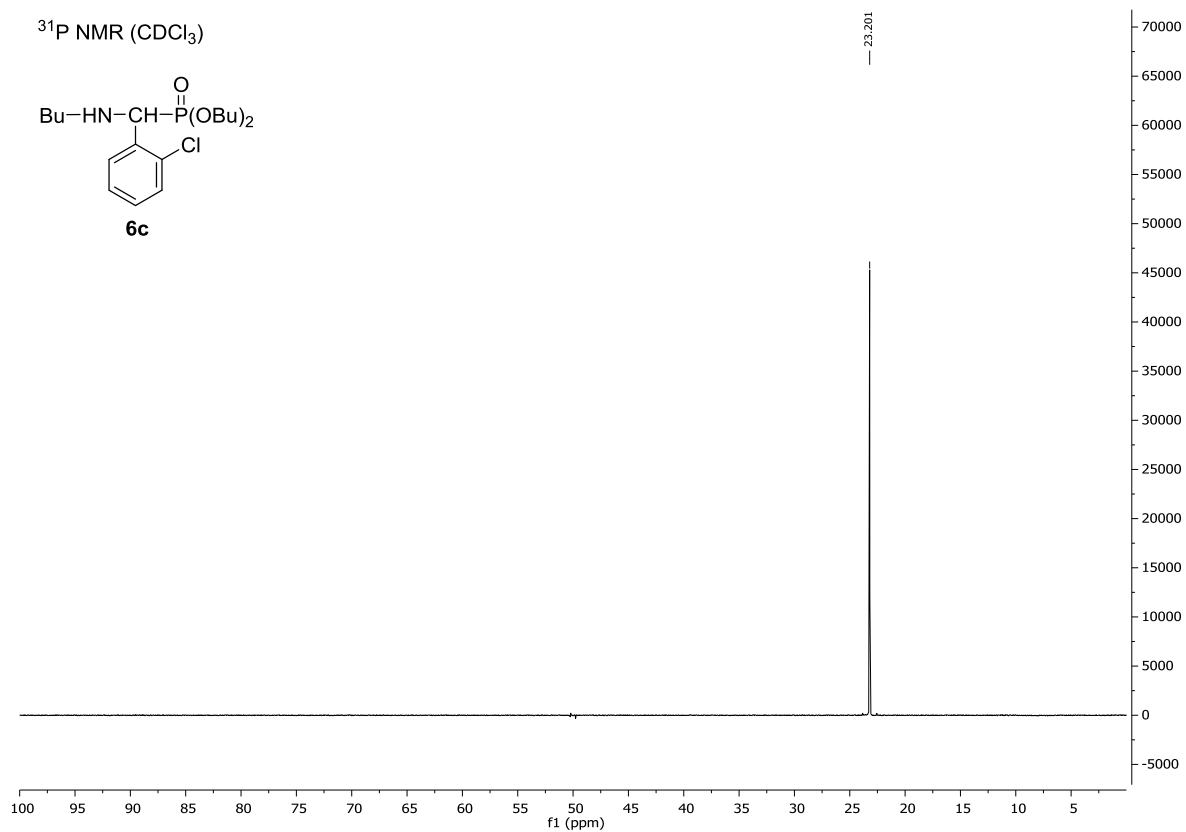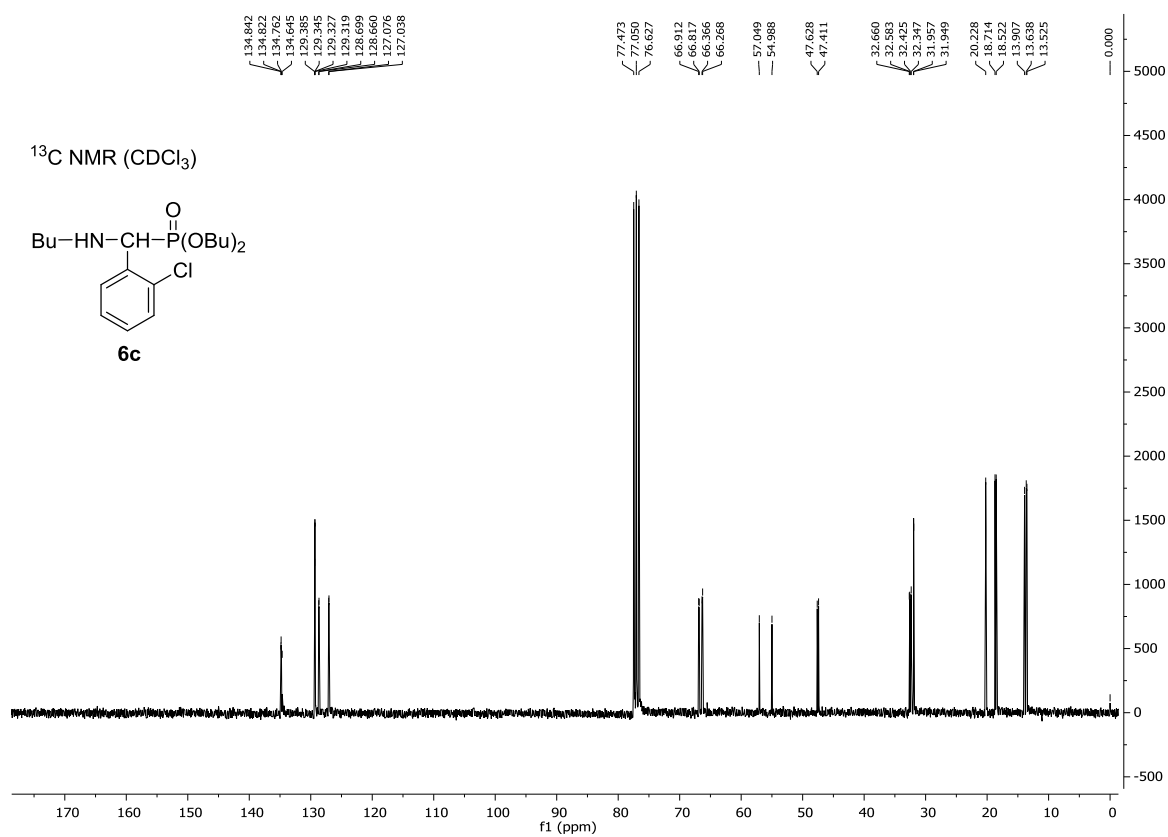

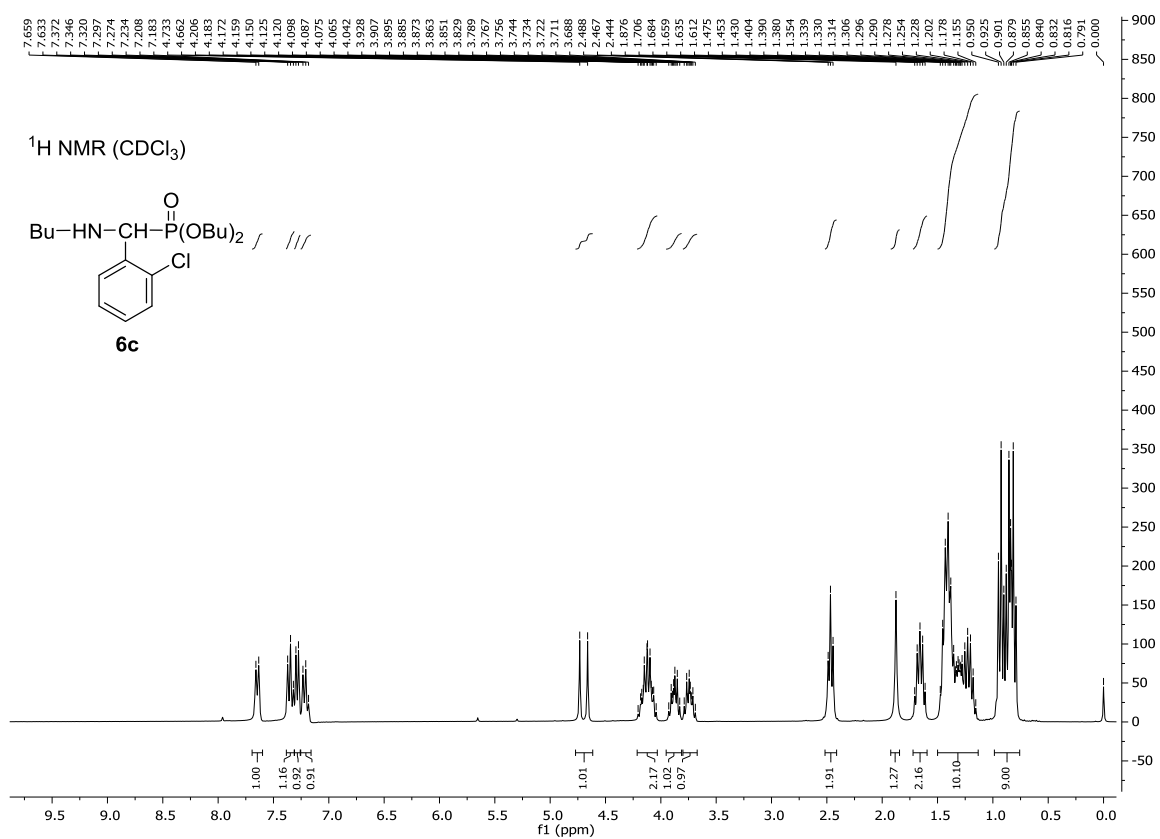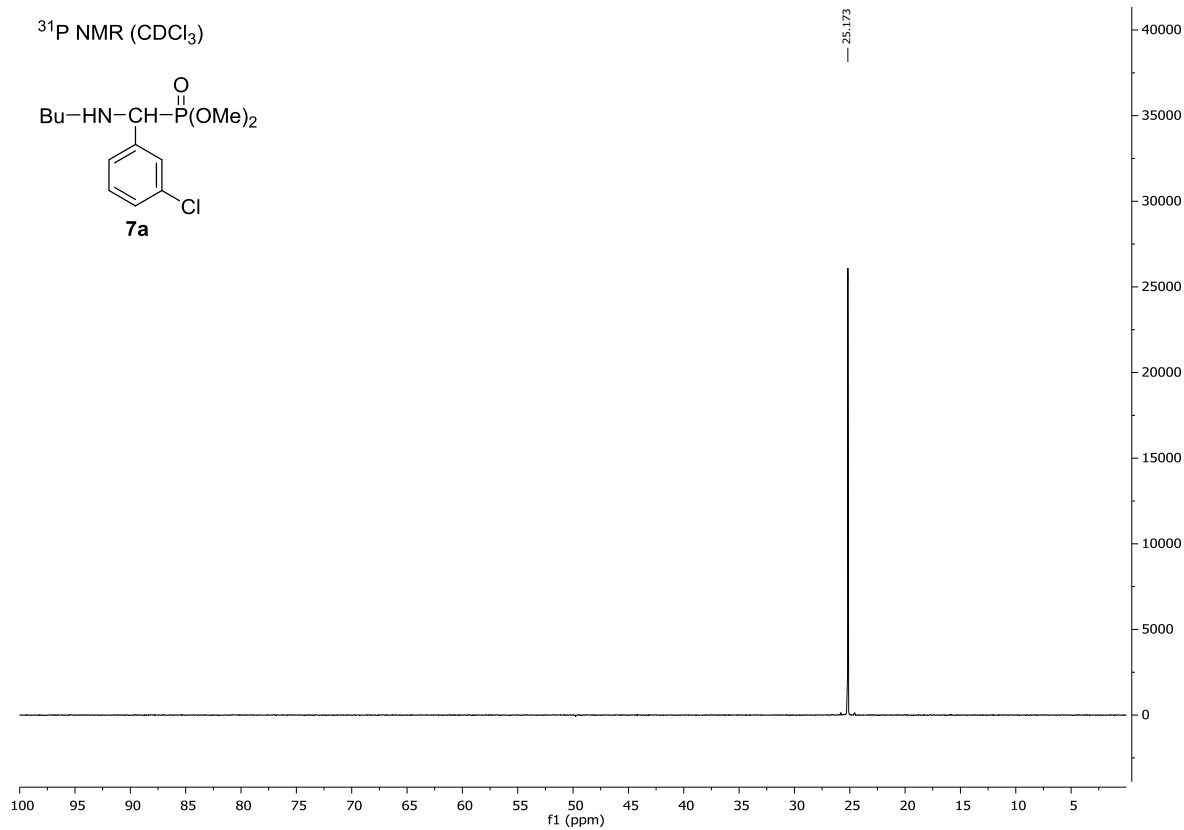

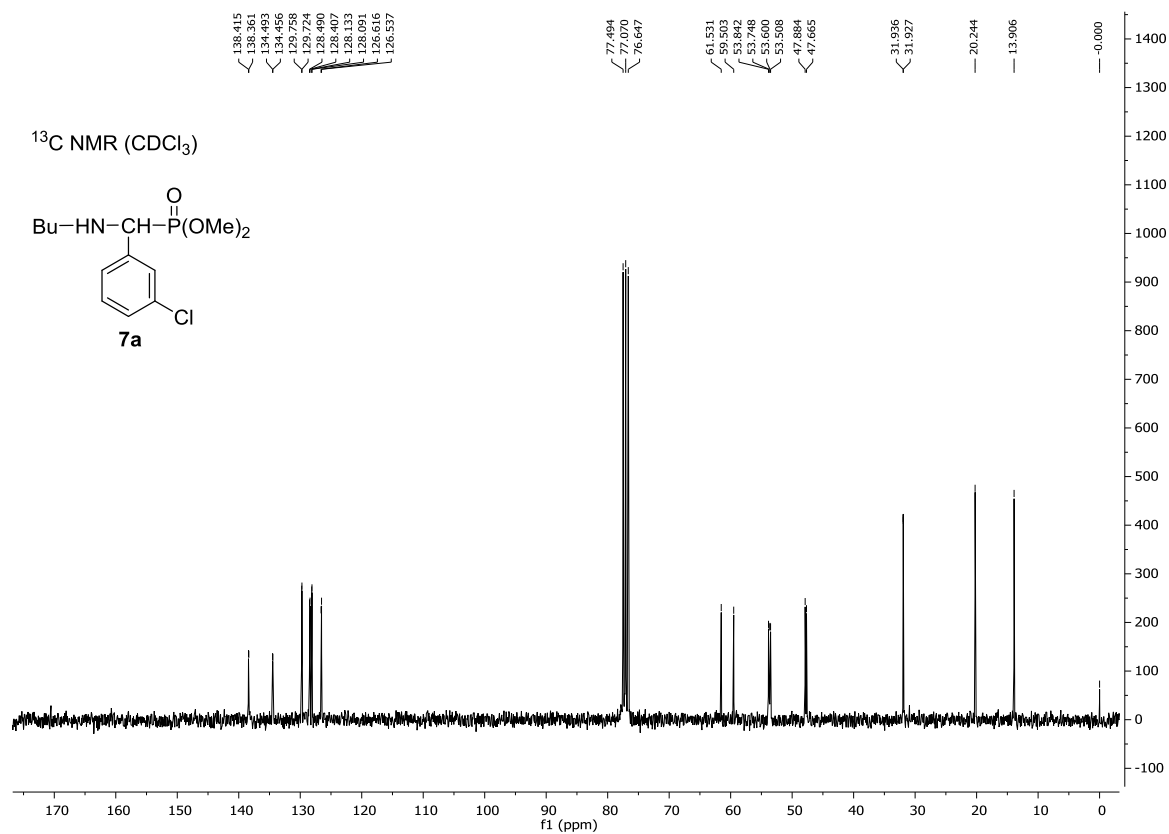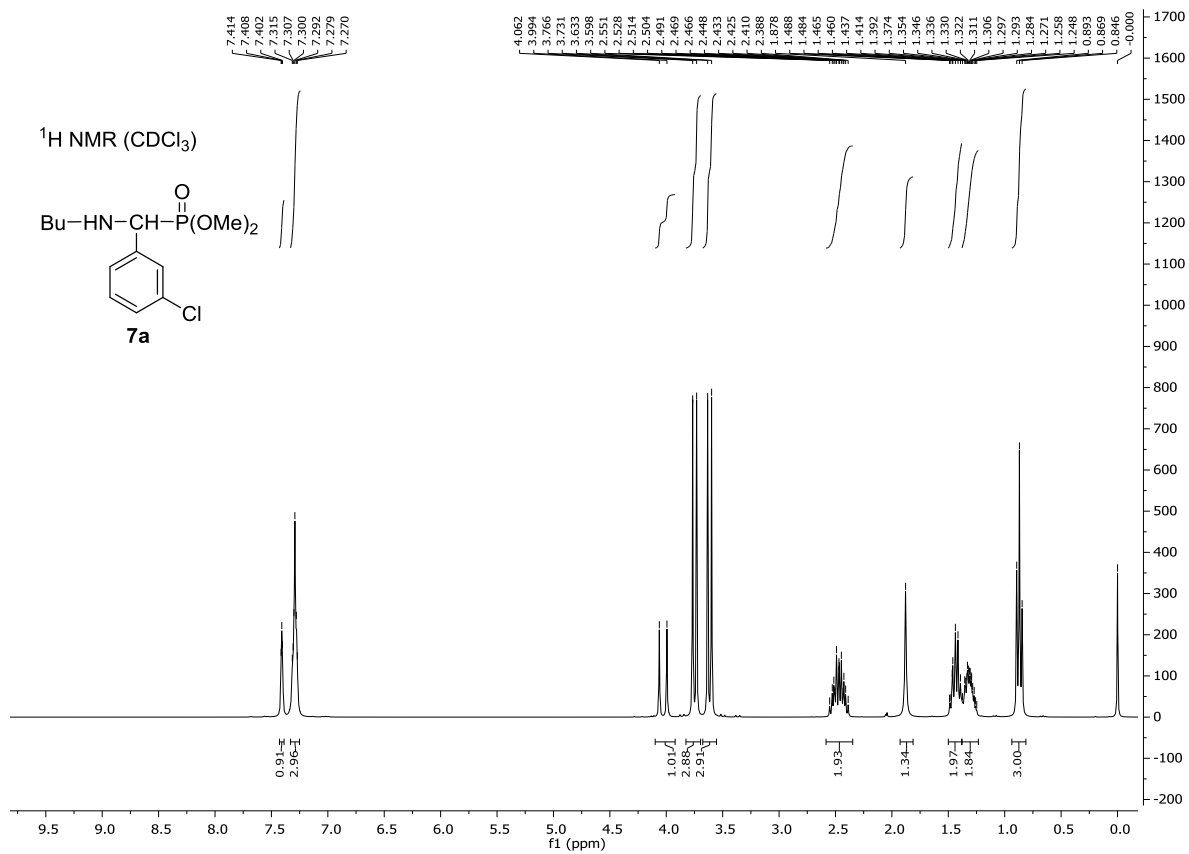

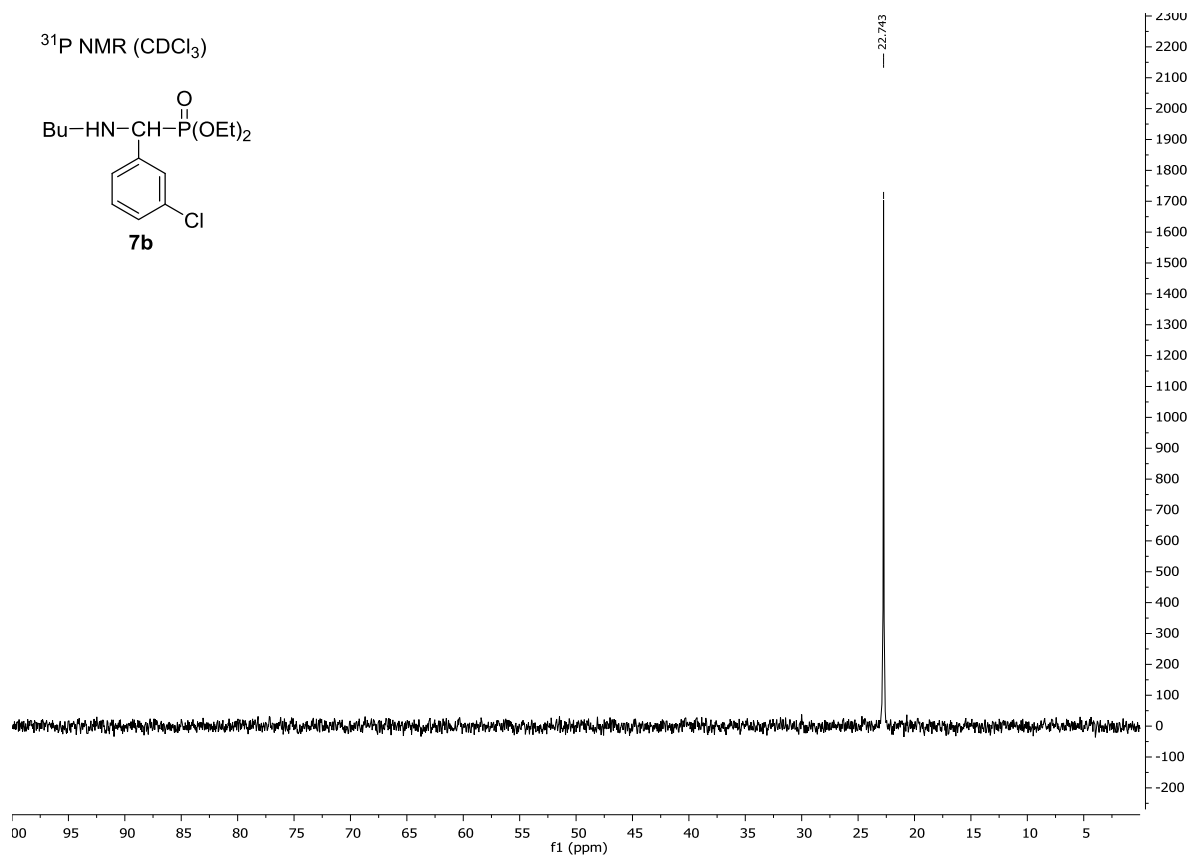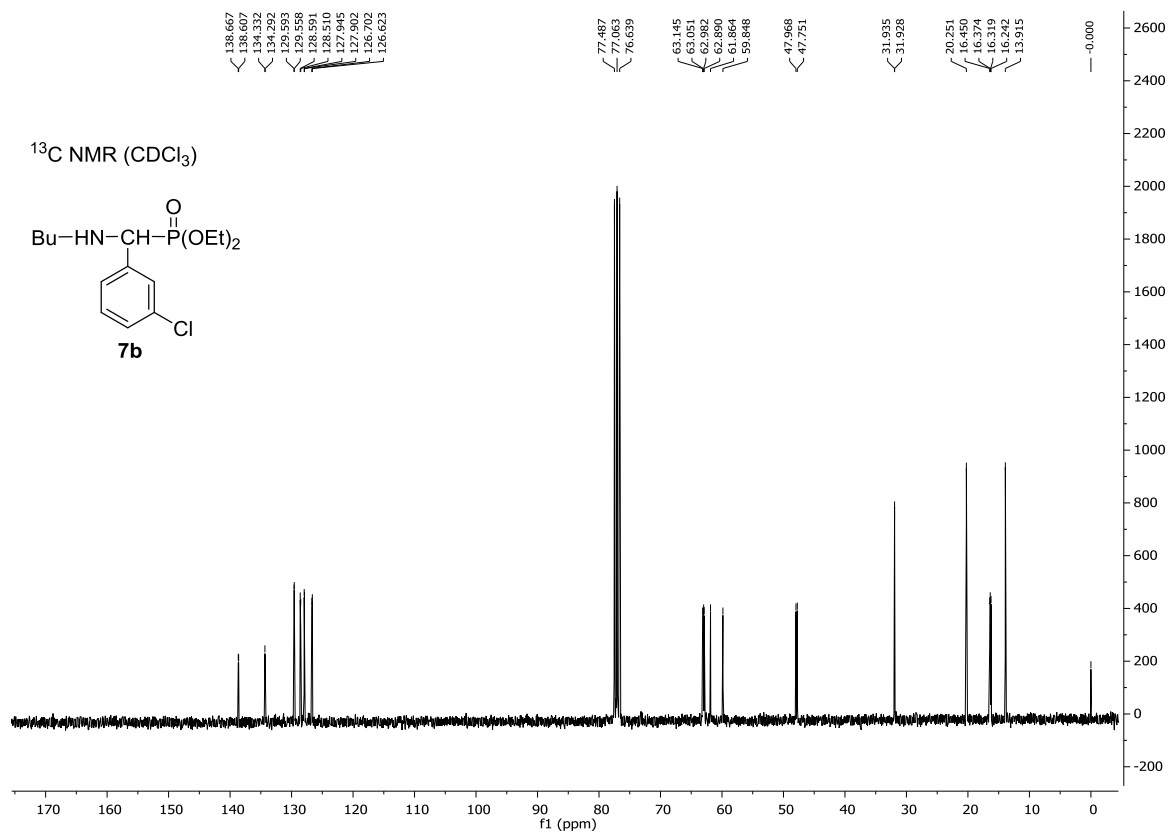

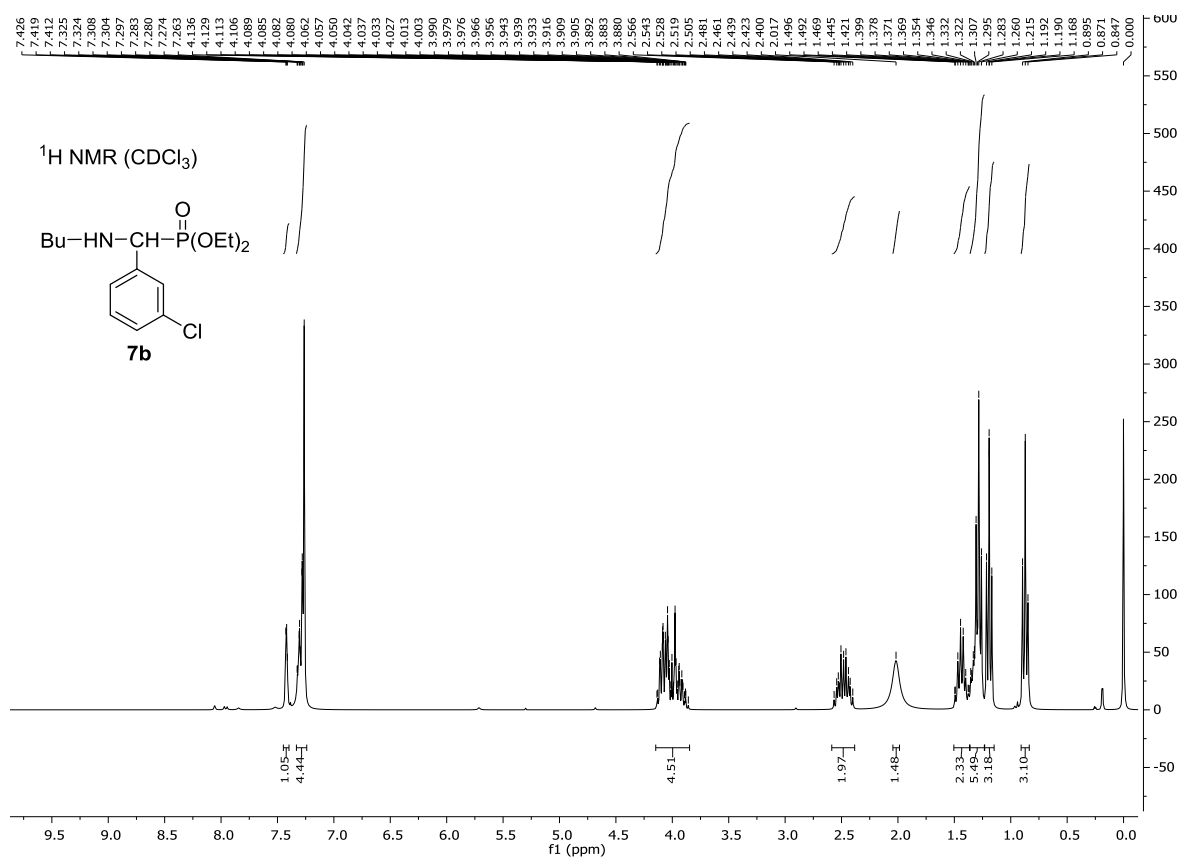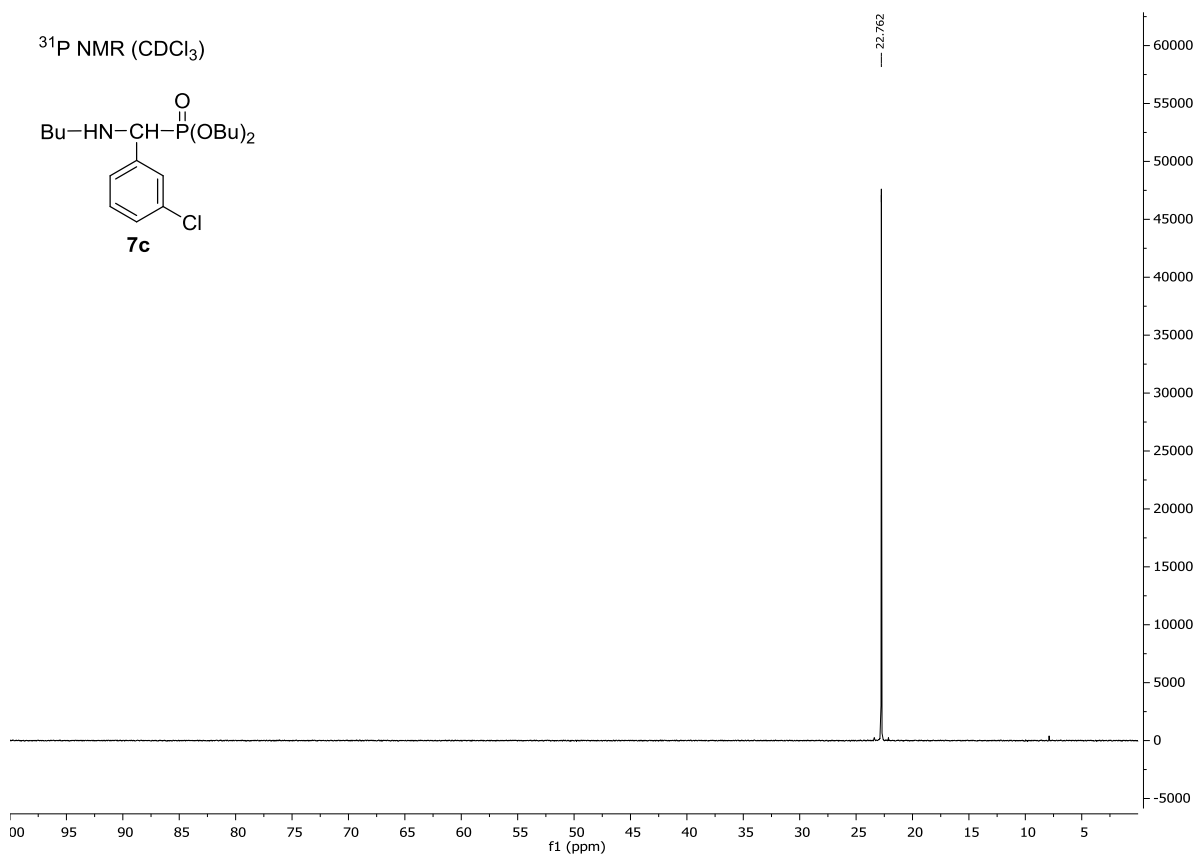



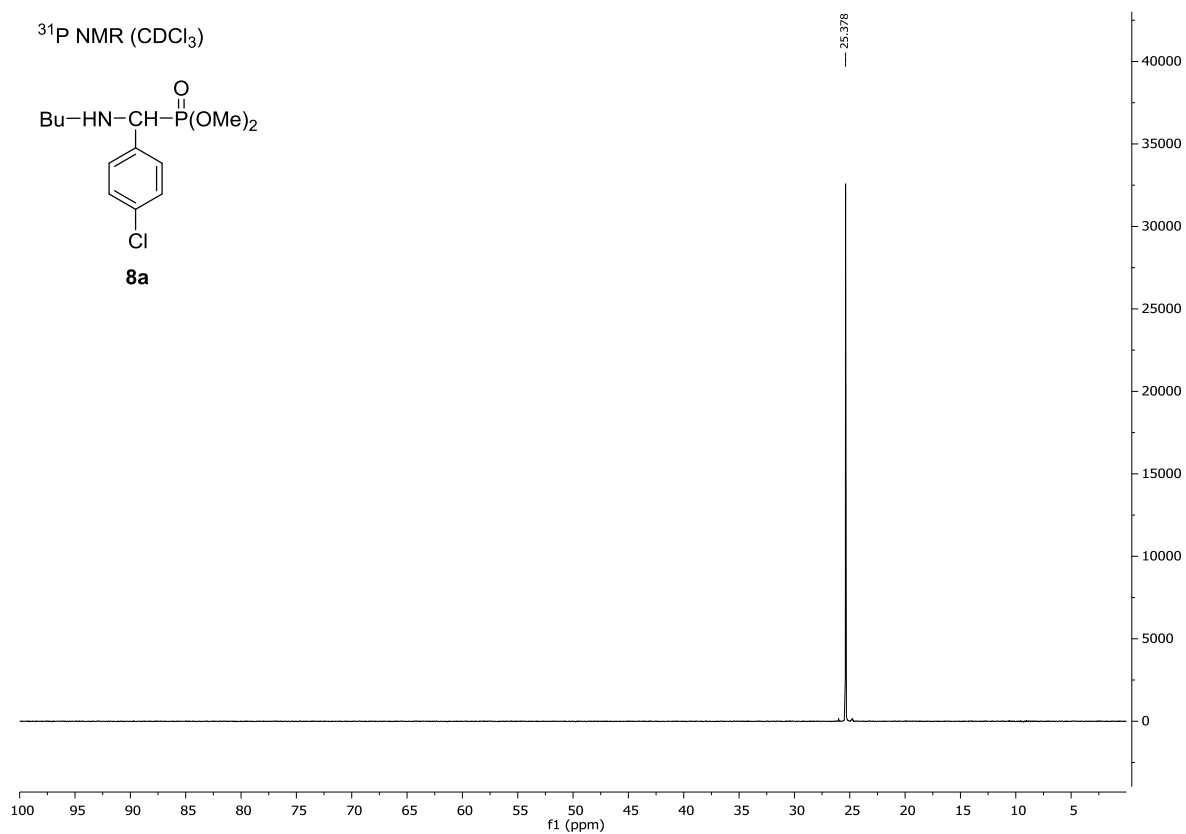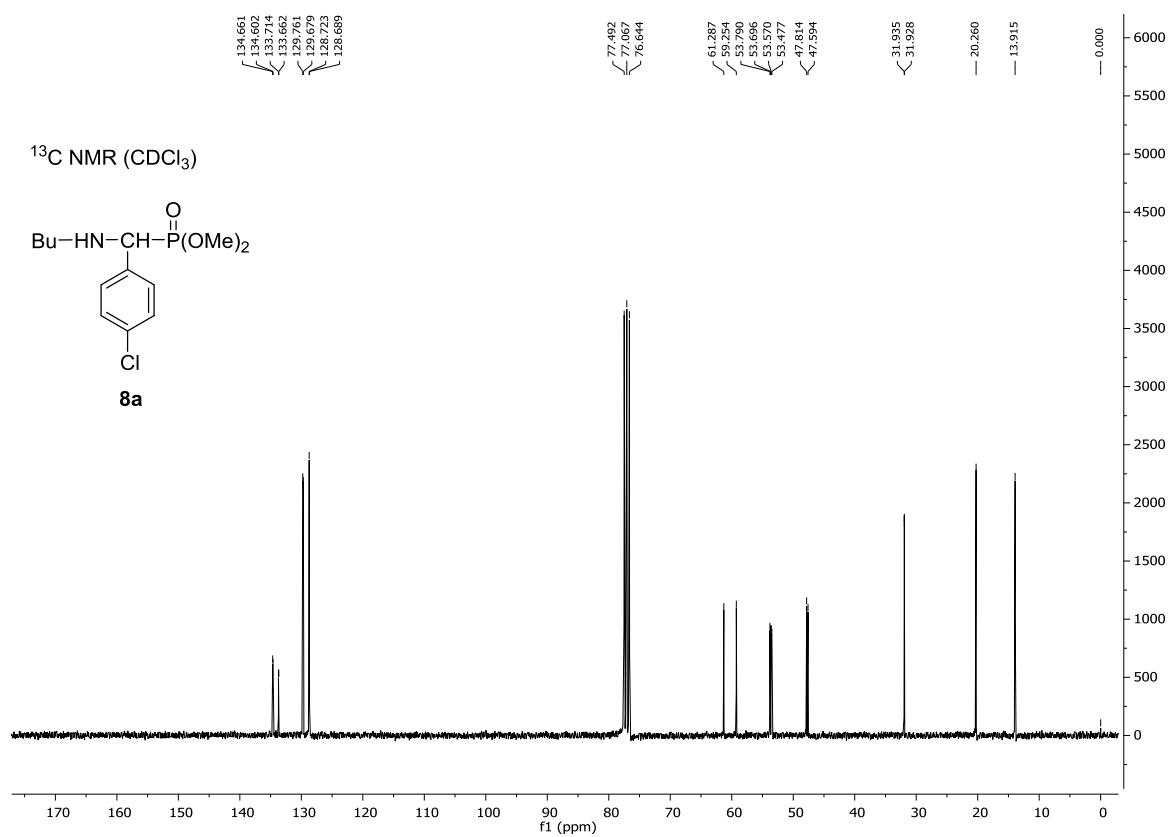

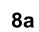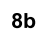

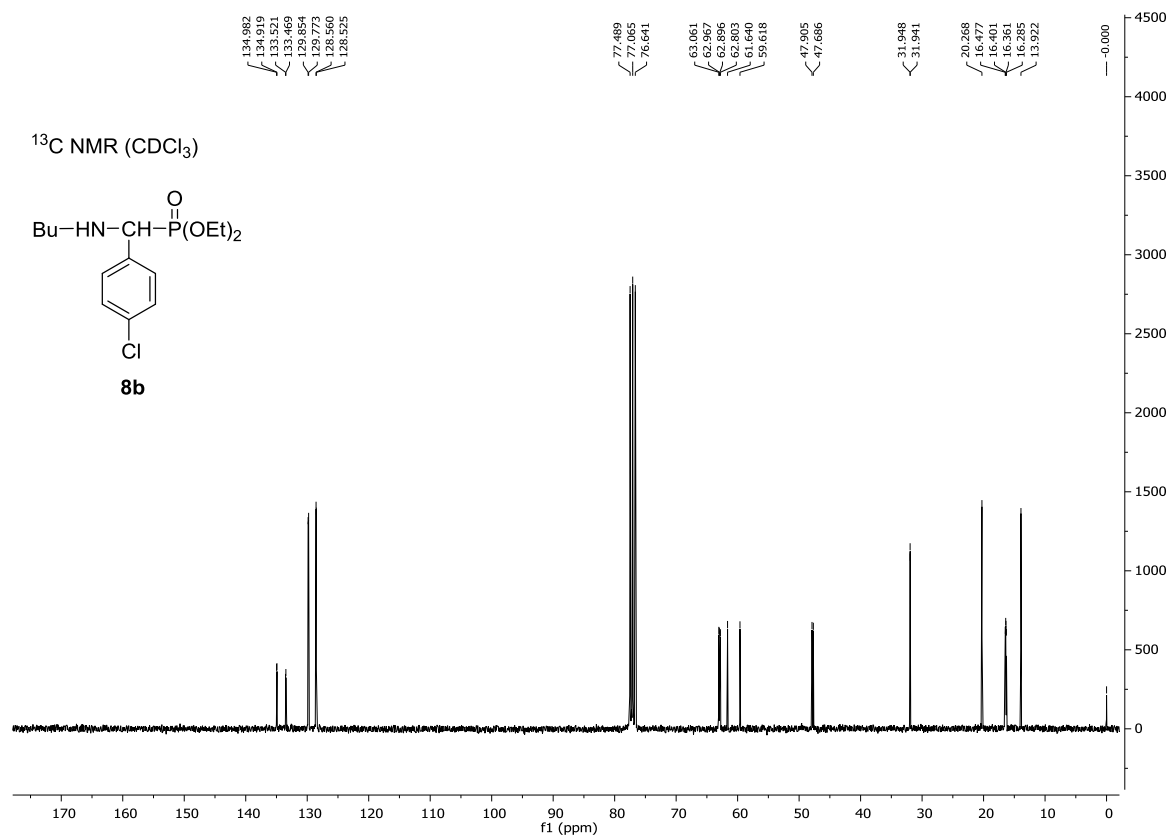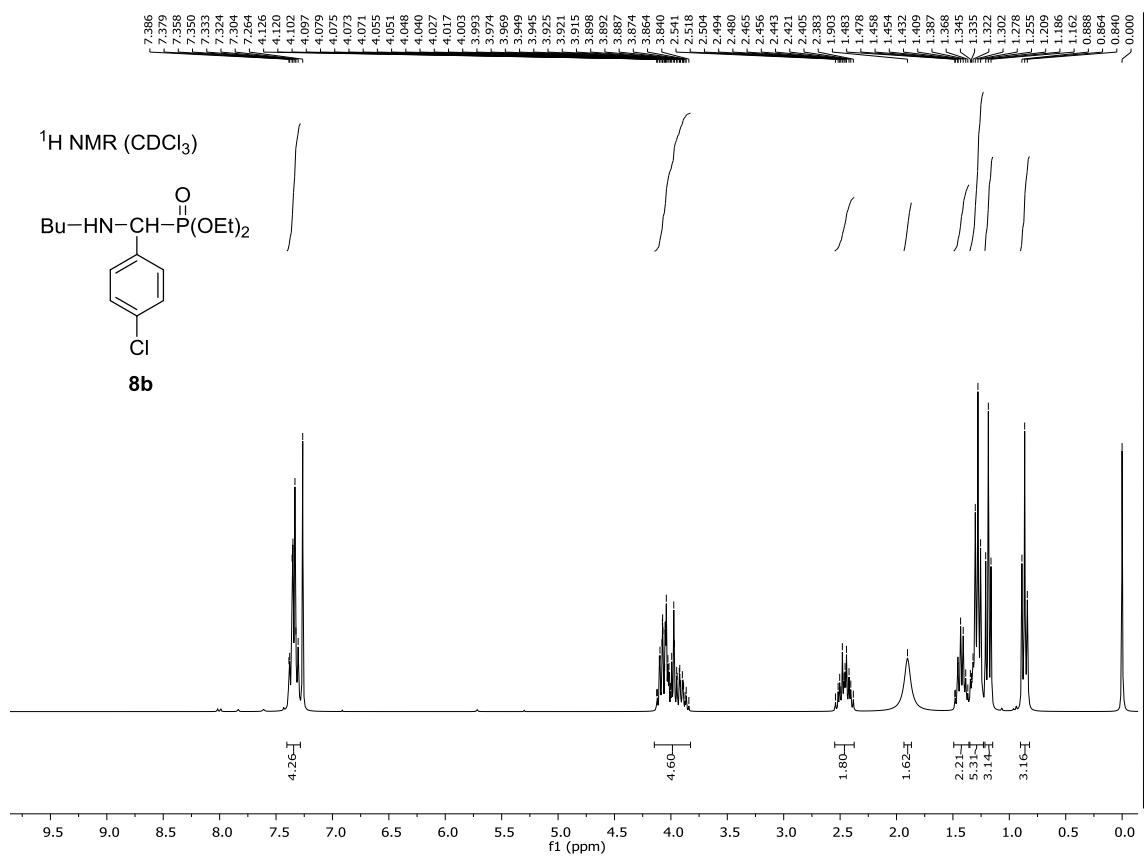

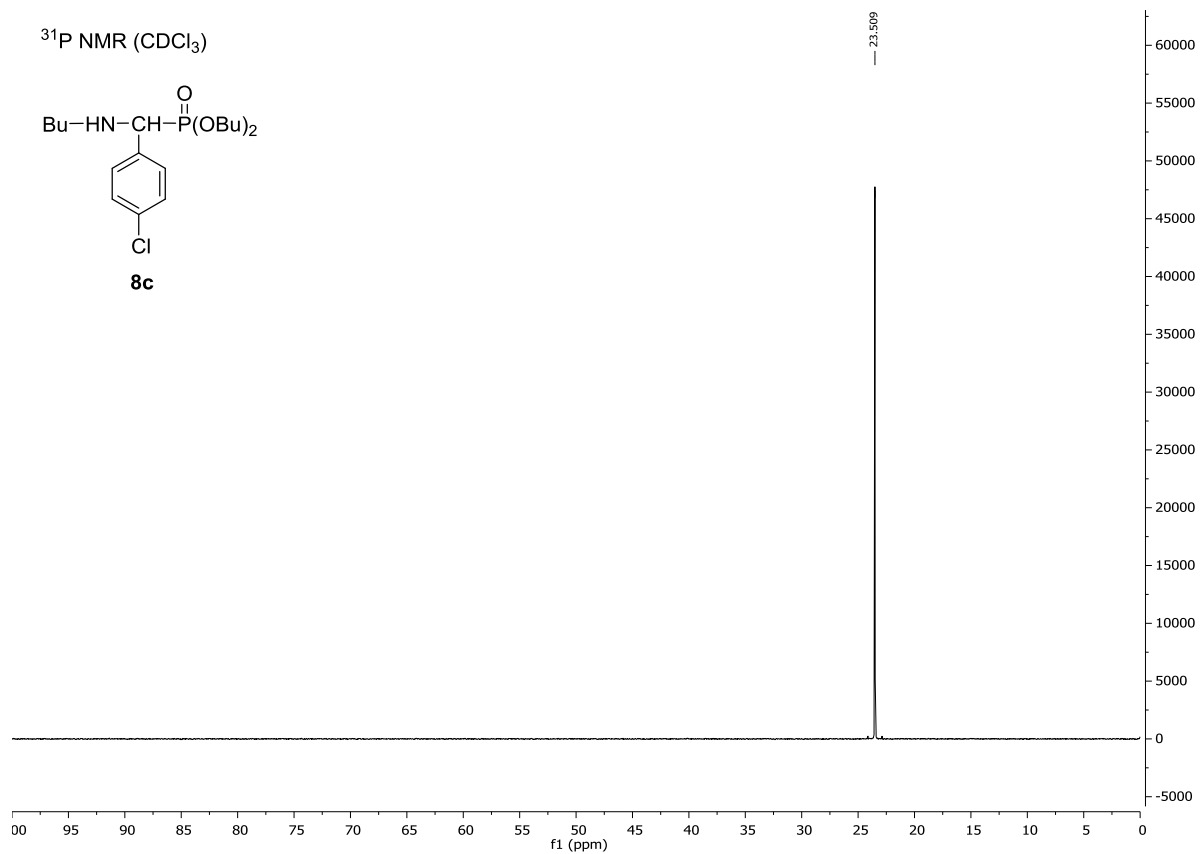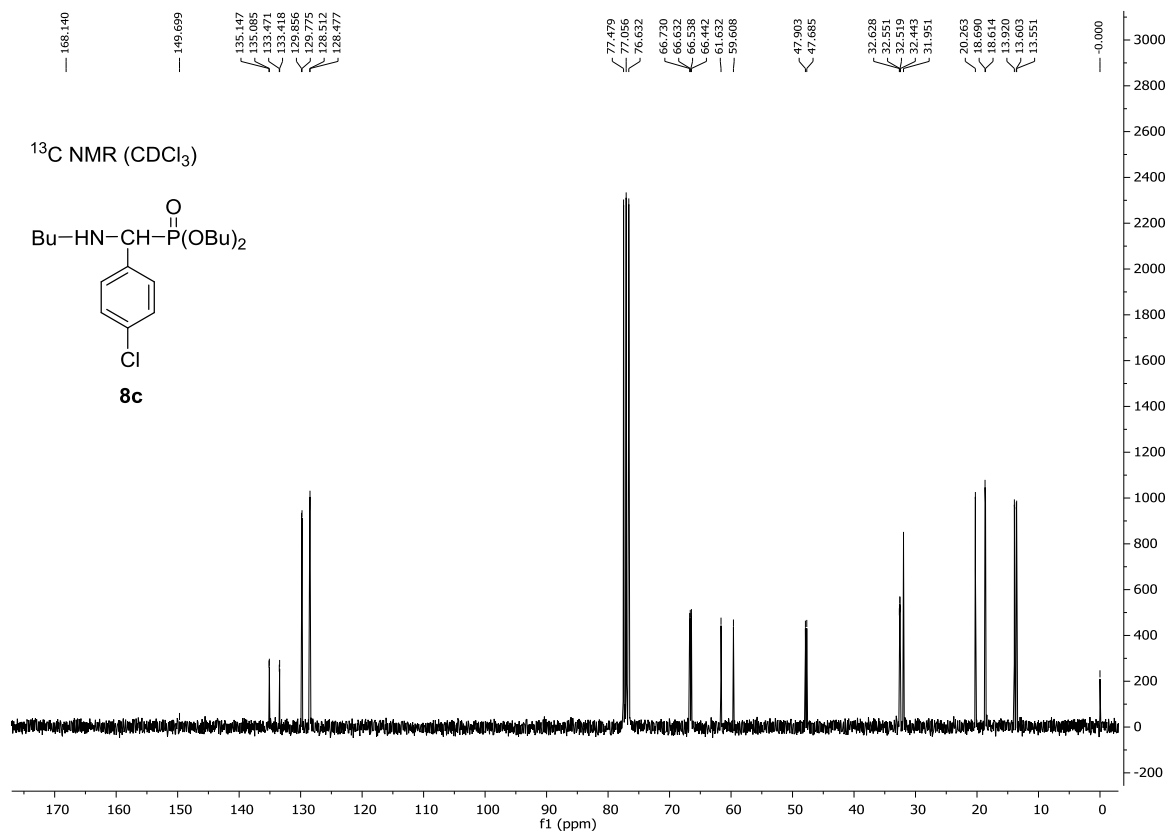

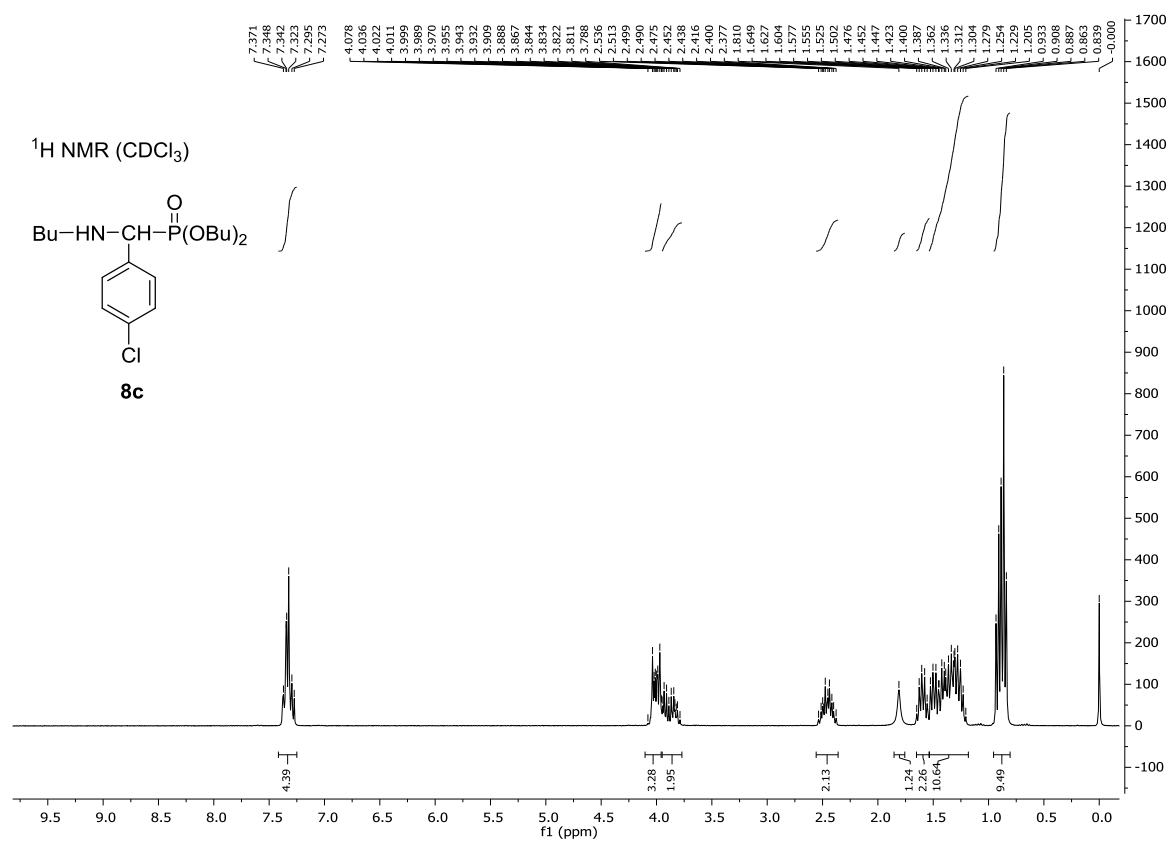

## References

- S1 Zhang, E.; Tian, H.; Xu, S.; Yu, X.; Xu, Q. *Org. Lett.* **2013**, *15*, 2704–2707.
- S2 Song, Q.-W.; Yu, B.; Liu, A.-H.; He, Y.; Yang, Z.-Z.; Diao, Z.-F.; Song, Q.-C.; Li, X.-D.; He, L.-N. *RSC Adv.* **2013**, *3*, 19009–19014.
- S3 Kuzmina, O. M.; Knochel, P. *Org. Lett.* **2014**, *16*, 5208–5211.
- S4 Xu, J.; Zhuang, R.; Bao, L.; Tang, G.; Zhao, Y. *Green Chem.* **2012**, *14*, 2384–2387.
- S5 Kiss, N. Z.; Kaszás, A.; Drahos, L.; Mucsi, Z.; Keglevich, G. *Tetrahedron Lett.* **2012**, *53*, 207–209.
- S6 Keglevich, G.; Kiss, N. Z.; Menyhárd, D. K.; Fehérvári, A.; Csontos, I. *Heteroatom Chem.* **2012**, *23*, 171–178.
- S7 Ghafuri, H.; Rashidizadeh, A.; Zand, H. R. E. *RSC Adv.* **2016**, *6*, 16046–16054.
- S8 Li, X.-C.; Gong, S.-S.; Zeng, D.-Y.; You, Y.-H.; Sun, Q. *Tetrahedron Lett.* **2016**, *57*, 1782–1785.
- S9 Milen, M.; Ábrányi-Balogh, P.; Dancsó, A.; Frigyes, D.; Pongó, L.; Keglevich, G. *Tetrahedron Lett.* **2013**, *54*, 5430–5433.
- S10 Gallardo-Macias, R.; Nakayama, K. *Synthesis* **2010**, 57–62.
- S11 Keglevich, G.; Szekrényi, A. *Lett. Org. Chem.* **2008**, *5*, 616–622.
- S12 Tang, J.; Wang, L.; Wang, W.; Zhang, L.; Wu, S.; Mao, D. *J. Fluorine Chem.* **2011**, *132*, 102–106.
- S13 Sheldrick, G. M. *Acta Cryst.* **2008**, *64*, 112–122.
- S14 Spek, A. L. *Acta Cryst.* **2009**, *65*, 148–155.
- S15 *Diamond - Crystal and Molecular Structure Visualization*, Crystal Impact - Dr. H. Putz & Dr. K. Brandenburg, GbR.: Kreuzherrenstr. 102, 53227 Bonn, Germany.
- S16 Becke, A. D. *J. Chem. Phys.* **1993**, *98*, 5648–5656.
- S17 Lee, C.; Yang, W.; Parr, R. G. *Phys. Rev. B* **1988**, *37*, 785–789.
- S18 Stephens, P. J.; Devlin, F. J.; Chabalowski, C. F.; Frisch, M. J. *J. Phys. Chem.* **1994**, *98*, 11623–11627.
- S19 Francl, M. M.; Pietro, W. J.; Hehre, W. J.; Binkley, J. S.; DeFrees, D. J.; Pople, J. A.; Gordon, M. S. *J. Chem. Phys.* **1982**, *77*, 3654–3665.
- S20 Hariharan, P. C.; Pople, J. A. *Theoret. Chim. Acta* **1973**, *28*, 213–222.
- S21 *Gaussian 09*, Revision D.01; Gaussian, Inc.: Wallingford, CT, **2009**.
- S22 Tomasi, J.; Mennucci, B.; Cancès, E. *J. Mol. Struct. THEOCHEM* **1999**, *464*, 211–226.
- S23 Tomasi, J.; Mennucci, B.; Cammi, R. *Chem. Rev.* **2005**, *105*, 2999–3093.
